# Supplementary material for: Waterlogging in soil restricts the growth of Gleditsia sinensis seedlings and inhibits the accumulation of lignans and phenolic acids in thorns
Source: PeerJ. 2024 Mar 22;12:e17137. doi: 10.7717/peerj.17137 (PMC10962338; doi:10.7717/peerj.17137)
Supplement: Supplemental Information 2 [file peerj-12-17137-s002.xlsx]

## Sheet: Table S1
Table S1 Soil physical and cheical properties in control soil and pindstrup soil.
Soil properties	Control soil	Pindstrup soil
pH	7.26±0.07a	7.55±0.13a
TN (%)	2.08±0.33a	1.91±0.04 a
TP (g.kg-1)	0.89±0.03a	1.03±0.07a
K (g.kg-1)	21.48±1.35a	16.76±3.85a
Ca (g.kg-1)	13.61±1.13b	31.14±2.85a
Mg (g.kg-1)	7.94±0.39a	7.36±1.26a
Fe (g.kg-1)	36.13±3.21a	29.38±8.08a
Cu (g.kg-1)	77.05±8.69a	99.95±21.36a
Zn (g.kg-1)	213.00±36.49a	309.00±78.38a
Mo (g.kg-1)	2.24±0.16a	3.86±0.72a
Mn (g.kg-1)	849.75±21.47a	822.25±149.27a
The data represent the mean ± SD (n = 4). Different lowercase letters in the same row represent significant differences between contrast soil and pindstrup soil (P < 0.05).

## Sheet: Table S2
Table S2 All annotated metabolites are detected by UHPLC-OE-MS platform.
id	Putative metabolites	RT	m/z	Ion mode	Control soil 1	Control soil 2	Control soil 3	Control soil 4	Control soil 5	Control soil 6	Pindstrup soil 1	Pindstrup soil 2	Pindstrup soil 3	Pindstrup soil 4	Pindstrup soil 5	Pindstrup soil 6
1	2-Methyl-1,3-cyclohexadiene	76.9294	95.0848	POS	0.0518343	0.0689939	0.0123778	0.00912065	0.00988528	0.0525605	0.0576481	0.0533425	0.0624737	0.0551589	0.0569625	0.0667597
2	Glyoxylic acid	26.3028	72.9934	NEG	0.197313	0.610396	0.709423	0.338512	0.400827	0.279442	0.352785	0.352798	0.287927	0.272076	0.177329	0.262895
3	Kojic acid	22.0534	141.018	NEG	4.08135	3.88102	3.42371	3.88854	3.72139	4.04225	3.46045	3.91845	4.09448	3.4042	4.08807	3.67073
4	Isoscopoletin	171.436	191.036	NEG	34.2687	17.5963	16.1528	39.0527	35.0537	5.62636	10.4424	16.8136	40.6923	23.2891	17.1911	31.9265
5	3,4-Dihydroxybenzoic acid	47.7499	153.02	NEG	0.513969	1.01983	0.694091	0.629663	0.535246	0.492613	0.486624	0.505363	0.551184	0.523205	0.524194	0.593199
6	Adenosine	46.6356	268.102	POS	0.125291	0.0841672	0.135392	0.122036	0.125719	0.0987045	0.173728	0.127607	0.158772	0.175745	0.172118	0.186114
7	4-Hydroxybenzaldehyde	164.19	121.03	NEG	8.21998	9.02426	5.77922	8.73601	9.7131	6.34604	3.92923	3.98179	4.9131	4.44157	3.7493	4.31137
8	2-Isopropylmalic acid	107.197	175.062	NEG	0.576569	0.406259	2.12216	1.67341	2.32992	1.10801	2.09151	1.31377	2.32969	1.82164	1.21238	1.33864
9	(R)-lipoic acid	21.7529	223.021	NEG	0.832887	0.643964	0.566629	0.771218	0.685651	0.813851	0.618782	0.810654	0.829485	0.699839	0.761606	0.640897
10	Phorbol	237.703	387.177	POS	3.69036	3.92221	2.75382	3.63654	3.92315	3.84374	5.27816	2.45981	1.67024	2.41136	2.69426	6.83902
12	Blinin	249.526	415.209	POS	2.66599	3.01734	2.03246	2.8452	3.07138	2.93774	4.22705	1.68889	1.1873	1.63944	1.99505	5.31979
13	Isosilybin	209.088	481.115	NEG	15.6541	38.2412	30.8124	22.6601	33.9974	15.5447	22.71	18.2998	13.4195	14.5103	13.6418	25.9892
14	4-Nitrophenol	199.161	138.02	NEG	2.47425	2.73962	1.4888	2.34458	2.22027	3.09571	1.08892	1.16337	1.22004	1.09772	1.31252	1.30769
16	Hydrogen phosphate	30.75	96.97	NEG	0.417919	0.454665	0.616675	0.356581	0.366606	0.337044	0.526291	0.519106	0.848747	0.611848	0.56275	0.651873
17	4-Methyl-2-pentenal	118.585	99.0798	POS	0.391109	0.385804	0.401676	0.401303	0.419229	0.393741	0.372601	0.378409	0.374559	0.402037	0.387002	0.383993
18	L-Malic acid	32.4554	133.015	NEG	1.78985	10.101	6.3272	4.81649	4.98703	1.06578	1.74718	1.22134	1.69939	0.562458	1.42937	1.44659
19	Didox	24.9452	168.034	NEG	5.2616	3.49887	4.31054	4.36293	5.04485	4.80105	6.40719	6.35838	5.57608	5.46624	6.2187	6.68108
20	Vitexin	180.027	431.1	NEG	63.4479	79.8082	52.2355	85.9837	70.5863	85.973	56.1122	66.6485	83.5514	62.1514	76.5868	62.4157
21	Taurine	24.8601	124.008	NEG	0.447648	0.306082	0.370355	0.311691	0.487957	0.329427	0.623737	0.667384	0.639558	0.617569	0.566015	0.51872
22	2-Methoxycinnamaldehyde	264.184	163.074	POS	0.364385	0.347436	0.340981	0.342827	0.351279	0.346252	0.366792	0.346075	0.344868	0.34665	0.355283	0.349304
23	Azelaic acid	199.159	187.099	NEG	7.9162	7.37431	5.81559	8.36317	9.17238	6.31567	4.5167	3.6965	4.57746	4.01371	3.53389	3.75107
24	Indole-3-lactic acid	69.4482	188.069	POS	10.6354	15.2407	11.7142	15.0559	13.6758	2.48794	8.78608	7.14607	8.29621	8.83626	5.51834	6.69767
25	Palmitoylethanolamide	303.923	300.287	POS	0.119251	0.111353	0.0806893	0.084414	0.0943054	0.101739	0.0795766	0.0832827	0.0981964	0.0735755	0.0832157	0.0811212
26	4-Pyridoxic acid	24.8624	184.062	POS	2.12647	1.48784	1.91622	1.78408	2.03438	1.6684	2.32725	2.41608	2.13981	2.03415	2.32401	2.5009
27	Traumatic Acid	229.04	227.13	NEG	0.578249	0.469165	0.585305	0.713453	0.831211	0.538926	0.406929	0.425006	0.5459	0.459552	0.404018	0.429688
28	2-Methoxy-4-vinylphenol	60.0737	149.062	NEG	0.411764	0.552362	0.326898	0.0515839	0.494829	0.28614	0.527109	0.396605	0.307675	0.493423	0.488538	0.438049
29	Taxifolin	183.33	303.052	NEG	216.761	447.706	367.954	261.46	368.992	231.474	226.733	289.553	237.806	255.853	252.435	285.994
30	Linoleoyl ethanolamide	295.32	324.287	POS	0.285059	0.39329	0.298923	0.35565	0.413337	0.495821	0.300394	0.36588	0.335779	0.312585	0.256051	0.32629
31	Vanillic acid	47.4067	167.036	NEG	7.97517	14.9803	9.55429	11.3581	10.9089	9.61349	7.27427	6.89848	7.69101	7.82746	5.86091	5.78271
32	Afalanine	166.486	206.083	NEG	6.26527	10.2703	6.40297	6.43131	11.2309	5.80417	7.03217	6.12258	10.8611	8.35608	6.39479	6.09043
33	Trehalose	25.8424	341.11	NEG	6.40357	5.68687	13.6644	6.43504	7.76894	4.69814	5.41055	6.04219	5.36715	4.37289	4.39584	6.31582
34	Alpinetin	193.221	271.094	POS	0.409134	0.398499	0.469704	0.489734	0.238678	0.412455	0.445512	0.511723	0.362323	0.486264	0.405638	0.507096
35	Succinic acid	32.0414	117.02	NEG	0.75341	1.13913	0.832888	0.788589	1.06056	0.531059	0.607492	0.621243	0.661167	0.527471	0.469517	0.726675
36	Syringaldehyde	178.565	183.064	POS	0.0317694	0.0557195	0.0517949	0.0513056	0.0699505	0.0419764	0.0283735	0.0334623	0.0262798	0.0370761	0.0258633	0.0343765
37	PC(16:2e/2:0)	279.364	520.336	POS	0.760144	0.383578	0.673654	0.499608	0.852999	0.536533	0.819668	0.855549	0.729203	0.728804	0.842388	1.06431
38	O-Acetyl-L-serine	24.7202	130.049	POS	0.952645	0.0297494	0.954675	0.577109	0.817359	0.822822	1.04796	1.15908	0.971363	0.967187	1.09361	1.04575
40	3-O-Methylquercetin	211.091	315.052	NEG	8.67253	35.6715	11.048	5.04524	8.55992	16.3585	13.4079	18.6922	19.9522	17.8275	27.631	17.48
41	16-Hydroxy hexadecanoic acid	310.578	271.229	NEG	73.753	96.5845	83.6275	66.6913	73.1678	88.8511	80.9639	82.0512	69.4017	76.3788	60.9648	88.7153
42	(2S,3R,4S)-4-Hydroxyisoleucine	21.035	130.085	POS	0.0113225	0.826947	0.00868031	0.269407	0.239382	0.0109272	0.0119129	0.00122267	0.000929536	0.00367856	0.00558204	0.0141688
44	1,3,5-Trihydroxybenzene	162.353	125.025	NEG	0.189002	0.318328	0.238129	0.52441	0.229338	0.171456	0.206603	0.143689	0.18762	0.198397	0.177763	0.0827083
45	Syringic acid	81.9796	199.059	POS	0.0504699	0.117388	0.0771051	0.0687249	0.0845433	0.0596479	0.0483138	0.039112	0.0635699	0.0541333	0.0350822	0.0360364
46	(+)-Secoisolariciresinol	188.616	361.168	NEG	4.57706	8.37608	8.05303	6.79256	8.16123	7.6179	7.23389	6.72125	8.28599	6.94104	6.9768	5.61632
47	2,2,5,7,8-Pentamethyl-6-Chromanol	321.883	265.149	NEG	2.67745	3.80811	3.44731	2.93114	2.40739	3.00094	3.15652	3.05574	3.24438	3.4064	3.00787	3.83443
48	Glycerophosphocholine	24.6545	258.108	POS	0.237207	0.334399	0.307202	0.220016	0.278368	0.169755	0.488577	0.610434	0.543108	0.479539	0.562922	0.744858
49	Kynurenic Acid	149.897	190.049	POS	0.0891354	0.0949198	0.102132	0.105536	0.104641	0.115443	0.0815238	0.112468	0.0879119	0.0947093	0.0937112	0.0850089
50	Phytosphingosine	248.95	318.297	POS	1.11687	1.36308	1.87331	0.874529	1.31482	1.5878	1.47559	1.32064	0.811099	1.83102	1.22946	1.57975
51	(-)-Camphoric acid	207.114	199.098	NEG	0.377016	0.238892	0.304566	0.373538	0.482595	0.344738	0.19651	0.185837	0.220116	0.129019	0.205601	0.173467
52	Lapachol	144.335	241.088	NEG	11.5952	12.4491	10.9248	12.6634	12.4315	10.7917	8.97889	9.97813	9.64029	10.5877	9.11854	10.6307
53	Coniferaldehyde	179.237	179.069	POS	1.58508	1.79703	1.65962	1.72148	1.74886	1.58088	1.69446	1.49317	1.78378	1.42657	1.49648	1.60519
54	2-indolecarboxylic-acid	193.235	160.041	NEG	9.3069	8.85572	9.95736	10.0124	7.71273	9.85605	8.60066	9.94657	10.5233	8.50078	8.70469	9.01725
55	D-Arabitol	24.9394	151.062	NEG	5.63318	4.98009	5.36686	5.68872	6.8915	5.44431	5.85881	5.94775	5.99655	6.32312	5.75652	5.31973
57	Mannitol	24.8601	181.073	NEG	25.9394	17.8504	22.7474	21.7289	27.9714	23.4062	29.9975	31.031	28.0566	26.9056	30.6071	33.0171
58	2-Benzofurancarboxaldehyde	148.079	147.043	POS	0.0707963	0.0969867	0.0732447	0.0630404	0.088708	0.0674484	0.0800457	0.0670869	0.0748346	0.0791552	0.0819975	0.0868097
59	PC(18:2/18:2)	342.896	782.557	POS	0.0313841	0.0316271	0.0283188	0.0285322	0.0377752	0.0286853	0.03495	0.0384437	0.0315454	0.0246661	0.0319116	0.0303914
60	Dibutyl phthalate	283.447	277.146	NEG	0.0309553	0.228223	0.0628589	6.55415e-05	0.0509634	0.0488144	0.0911921	0.322613	0.0630233	0.125846	0.0383784	0.0769753
61	D-Pinitol	25.4325	193.072	NEG	2.26304	6.44855	4.02093	3.17294	2.33999	1.79101	1.4303	1.0256	2.29437	1.10309	0.89601	1.09563
62	Harmanine	175.107	199.074	POS	0.0599921	0.0692335	0.0568079	0.0653924	0.0713989	0.0756828	0.0562515	0.057587	0.0573757	0.0658369	0.055808	0.0503454
63	(±)-Dihydroactinidiolide	221.177	181.121	POS	0.0701436	0.0624984	0.0613993	0.0770253	0.110531	0.0749161	0.0402346	0.0355162	0.046548	0.0339189	0.0411055	0.0383413
64	Ac-DL-Trp-OH	179.371	245.094	NEG	8.14451	11.1348	9.79145	4.61301	7.3912	7.60365	4.0155	5.98415	7.36569	5.71489	2.84085	4.05087
65	Diethanolamine	356.286	74.0959	POS	1.35386	1.18104	1.2911	1.28829	1.17174	1.1672	1.31656	1.35044	1.31402	1.30821	1.1561	1.18683
66	Glutaric acid	52.3554	131.035	NEG	0.295945	0.498094	0.331022	0.329796	0.289639	0.46954	0.256616	0.26271	0.269604	0.264309	0.223562	0.254968
67	beta-Sitostenone	332.76	413.375	POS	1.51574e-05	0.197441	0.203293	0.215581	0.138851	0.225003	0.374868	0.310376	0.123252	0.226856	0.227084	0.112912
68	PC(14:0/22:3)	334.187	784.578	POS	0.00101478	0.1221	0.121476	0.15616	0.112088	0.143388	0.147275	0.197551	0.0833206	0.170737	0.159067	0.0951189
69	DL-Glutamine	24.2949	145.063	NEG	6.39846	4.18149	5.71112	5.27727	7.08146	5.75526	7.00549	8.08166	6.73221	6.6718	7.67432	7.75586
70	LPA(18:2)	333.823	433.238	NEG	1.06335	0.979749	1.68058	1.11703	1.05077	1.07784	1.88658	1.86044	1.24651	1.50814	1.42103	2.51747
71	LPA(18:3)	325.966	431.223	NEG	0.168875	0.127406	0.226453	0.159136	0.134969	0.158809	0.171713	0.192656	0.125136	0.168862	0.187211	0.357862
72	Citric acid	33.1288	191.021	NEG	1.44492	2.8725	5.00627	1.64585	4.16072	1.55994	2.09465	1.24382	2.08672	1.72845	1.15067	1.7275
73	Pyrrolidine	355.594	72.0802	POS	0.0757673	0.0861406	0.0787825	0.0839489	0.0919654	0.0795891	0.0926398	0.0904406	0.0783905	0.074779	0.0771396	0.069113
74	Isoorientin	172.762	447.096	NEG	45.91	61.2668	32.7539	53.396	53.1896	45.7419	35.1291	44.7217	61.4552	47.9172	55.6653	46.0888
75	Alisol A	250.321	549.382	NEG	3.26292	1.98367	2.126	2.02437	3.89761	2.69307	5.14328	4.54862	3.00674	2.44065	5.56793	4.88776
76	(R)-Leucic acid	176.071	131.072	NEG	0.918292	1.30025	1.56249	0.996948	0.964197	0.942028	0.951741	0.427198	0.806393	0.705967	0.571578	0.650692
77	PC(14:0/22:5)	312.089	780.561	POS	0.00231401	0.0266356	0.0185525	0.0260014	0.00172732	0.032176	0.0138182	0.0141419	0.026451	0.0118429	0.0331792	0.00932043
78	5-Acetylamino-6-formylamino-3-methyluracil	167.242	227.08	POS	0.24384	0.336558	0.215445	0.217544	0.261874	0.237667	0.206213	0.192731	0.260111	0.198716	0.193243	0.195505
79	LPC(18:3)	269.477	518.32	POS	0.277717	0.155279	0.255409	0.233865	0.327184	0.199479	0.26069	0.246333	0.237662	0.216331	0.251767	0.337399
80	5-Feruloylquinic acid	154.541	367.106	NEG	0.383464	0.404964	0.38769	0.405251	0.408298	0.42191	0.438264	0.38565	0.388514	0.373972	0.407583	0.422915
82	Sesamol	179.416	137.025	NEG	1.23294	1.6145	0.956599	1.20276	1.49916	0.975225	0.861018	0.925574	1.04126	1.10369	0.823106	0.918928
84	5-Hydroxy-L-tryptophan	44.7681	221.091	POS	0.172487	0.384556	0.167563	0.416935	0.189103	0.190163	0.217759	0.191955	0.146922	0.164324	0.0995879	0.105512
85	Rutin	177.419	609.149	NEG	0.45838	3.45527	1.50215	0.48314	0.97048	0.386366	0.606202	0.75933	1.30357	1.30741	0.780434	0.832867
86	LPE(16:0)	293.368	452.281	NEG	0.41577	0.575803	0.41788	0.852653	0.969896	0.649715	0.266523	0.254298	0.487306	0.354378	0.315524	0.28923
87	3-Methoxybenzoic-acid	359.471	151.041	NEG	0.0701892	0.0986178	0.0872797	0.109416	0.111383	0.0805274	0.0792335	0.0756893	0.0837808	0.0863185	0.0688097	0.0921559
88	3-hydroxytetradecanoic acid	284.741	243.198	NEG	0.227018	0.231759	0.222674	0.238967	0.282191	0.251622	0.182249	0.194132	0.193027	0.189498	0.186487	0.183107
89	Dodecanedioic acid	235.053	229.146	NEG	0.411129	0.335717	0.28694	0.366971	0.449208	0.307883	0.265521	0.228577	0.245576	0.253806	0.242534	0.298713
90	Undecanedioic acid	224.433	215.13	NEG	0.946641	0.797059	0.715079	0.90438	0.931643	0.781877	0.576855	0.527957	0.620449	0.598805	0.574323	0.56303
91	Pinocembrin	195.898	255.068	NEG	0.495108	0.425974	0.312263	0.34992	0.572857	0.217891	0.342368	0.485325	0.344977	0.399843	0.365691	0.607371
92	1H-Indole-2,3-dione	160	146.025	NEG	1.19833	1.56913	1.29525	1.44583	0.892116	1.38126	0.868561	0.949732	1.07347	0.943225	0.787701	0.816458
93	(-)-Epiafzelechin	174.588	275.089	POS	0.18638	0.187226	0.0959476	0.169591	0.24427	0.153062	0.117949	0.127995	0.153005	0.179256	0.203769	0.200287
94	Noreugenin	188.624	191.036	NEG	4.24745	4.59612	3.70085	4.15676	4.62401	3.06425	2.71231	3.35467	3.72696	3.1946	3.10594	3.28959
95	N-(3-Methylbut-2-EN-1-YL)-9H-purin-6-amine	139.825	204.123	POS	0.152022	0.0259876	0.042416	0.0942849	0.0638088	0.0804656	0.072645	0.166245	0.0377007	0.0511681	0.0750583	0.0693149
96	Indole-3-carboxaldehyde	190.542	146.059	POS	1.12343	1.43303	1.10776	1.39598	1.03658	1.47982	0.724727	0.738237	0.91962	0.772055	0.656837	0.651309
97	LPE(18:2)	282.13	476.281	NEG	0.803432	0.405537	0.849625	0.633671	0.917134	0.508935	0.938469	0.914899	0.887749	0.866519	1.01133	1.20517
98	Pregnenolone monosulfate	249.526	397.198	POS	0.045005	0.0523491	0.0320841	0.0481988	0.0501347	0.0510671	0.0731981	0.0280086	0.019637	0.0283857	0.0350352	0.0914032
99	Vicenin-1	168.875	563.142	NEG	4.13108	6.46549	6.59001	3.37013	7.64358	6.96547	6.00568	5.92607	7.68483	6.19036	4.29424	4.73466
100	6-Methylmercaptopurine	266.223	165.02	NEG	0.0208566	0.0161372	0.00769553	0.023395	0.0163072	0.0191766	0.0165727	0.0124301	0.0276645	0.0198829	0.0141013	0.0189528
101	Tetradecanedioic acid	253.679	257.177	NEG	0.309418	0.161701	0.149559	0.193683	0.192305	0.164896	0.146658	0.139072	0.153033	0.136111	0.132424	0.165335
103	Bayogenin	255.658	547.366	NEG	1.91757	1.57458	2.08245	1.67345	1.79597	2.24232	2.64297	3.22834	1.70218	1.88079	2.6194	2.72235
104	Tris(2,4-di-tert-butylphenyl)phosphate	309.103	663.447	POS	0.125356	1.63785	0.983109	1.11655	0.1323	2.02505	1.49743	0.901418	1.32733	1.15139	1.28323	1.58941
105	5-Methoxysalicylic acid	203.746	167.036	NEG	0.547455	1.05005	0.593602	0.549515	0.59487	0.538392	0.580163	0.648998	0.584539	0.566023	0.644972	0.659062
106	Oleamide	308.776	282.276	POS	26.308	27.6059	21.755	21.4527	31.3867	26.4746	33.7073	23.3119	22.3983	21.9837	17.6776	37.0642
108	Pelargonic acid	350.116	157.124	NEG	0.103503	0.110227	0.114692	0.0907843	0.010701	0.122856	0.099195	0.0930253	0.108218	0.0956399	0.108725	0.118277
109	[10]-Shogaol	288.706	331.229	NEG	0.43488	0.435849	0.504321	0.390989	0.372288	0.475513	0.409947	0.469275	0.47046	0.544228	0.483689	0.512179
110	3-Hydroxybenzaldehyde	146.205	121.03	NEG	1.19714	1.35054	1.11357	1.31579	1.27225	1.09769	0.99926	1.06862	1.16256	1.05095	1.07119	1.08503
111	Aromadendrin	193.965	287.057	NEG	33.1755	96.9667	57.8043	44.0871	74.5976	22.1934	40.1135	42.7954	27.6218	27.1142	23.1821	54.3564
112	Eleutheroside E	162.511	741.268	NEG	0.349788	1.40376	0.64442	0.637865	1.11514	0.648906	0.243509	0.336063	0.393585	0.321549	0.25737	0.329542
113	(2E)-N-(4-aminobutyl)-3-(4-hydroxy-3-methoxyphenyl)prop-2-enimidic acid	138.708	265.152	POS	0.0472538	0.094743	0.139531	0.121196	0.127349	0.0528382	0.0333469	0.0353192	0.0313211	0.0367628	0.0320556	0.0410336
114	Maleic acid	32.0572	115.004	NEG	0.828307	3.76795	2.68376	2.02465	2.03405	0.584167	1.03667	0.749023	0.885515	0.462197	0.832767	0.841922
115	Polygodial	265.554	233.156	NEG	0.615738	0.581492	0.595644	0.613034	0.589096	0.536021	0.575182	0.632998	0.860067	0.600103	0.568067	0.530546
116	Isorhamnetin-3-O-glucoside	189.931	477.106	NEG	1.10237	3.37855	1.44466	1.2267	2.19309	1.42569	1.04062	1.09608	1.19348	1.20851	1.59543	1.845
117	Palmitic amide	306.19	256.262	POS	4.80808	5.00429	3.84698	4.08428	5.46196	4.66581	5.77429	4.4022	3.81532	4.09698	3.45668	5.8845
118	Mesylate	32.1629	94.9813	NEG	0.240508	0.128308	0.12161	0.181911	0.193854	0.129157	0.17285	0.154688	0.16605	0.142431	0.167096	0.166402
119	Sphinganine	239.063	302.303	POS	0.511613	0.48462	0.433102	0.417897	0.427783	0.436485	0.438491	0.489272	0.695724	0.445638	0.378134	0.304374
120	4-Methylbenzaldehyde	237.736	121.064	POS	0.105623	0.11461	0.0804101	0.107238	0.111776	0.10695	0.153342	0.0740311	0.0495268	0.0735595	0.0763337	0.192433
121	L-Tyrosine	43.2178	182.08	POS	0.018963	0.0167155	0.0182506	0.0173533	0.0207714	0.0144994	0.0150755	0.0126954	0.0153142	0.0152217	0.0136637	0.0150642
122	Alisol B	289.411	531.372	NEG	2.29591	3.88785	2.27086	3.68651	1.9675	2.71295	2.12625	2.27367	2.3114	2.52703	2.39143	2.50955
123	Folinic acid	58.8479	472.162	NEG	0.0853848	0.167035	0.118193	0.0734958	0.0835212	0.091856	0.0900743	0.0829679	0.111517	0.126582	0.0701242	0.0858592
124	D-Proline	24.7509	116.07	POS	0.156983	0.303583	0.221568	0.465993	0.423017	0.044477	0.044584	0.0779251	0.0977864	0.0892206	0.110603	0.053673
125	(E)-3-(4-Hydroxyphenyl)-2-propenal	186.639	147.046	NEG	2.92478	2.96619	2.92753	2.69059	4.24739	3.43538	1.60681	1.7386	3.17093	2.02536	1.98343	1.77455
126	1-Cyano-2-hydroxy-3-butene	27.2142	98.0593	POS	0.0307351	0.0284018	0.0342274	0.0331749	0.0336533	0.0319677	0.0286859	0.0297123	0.0297895	0.0302686	0.0243879	0.028108
127	Octadecanamide	320.442	284.293	POS	1.19795	1.09735	0.769616	0.846905	1.32251	1.05477	1.33	0.909113	0.789745	0.772367	0.678235	1.3532
128	Antiarol	149.946	185.08	POS	0.146223	0.258488	0.183743	0.140587	0.157898	0.107985	0.127562	0.104825	0.0997257	0.133016	0.107016	0.114056
129	Isovitexin	196.524	431.1	NEG	2.95941	3.56503	2.57489	4.0634	3.51477	3.69627	2.91647	3.68456	4.18205	3.1467	3.95668	3.35557
130	DL-Threonine	24.6214	118.052	NEG	0.617815	0.408453	0.571587	0.543016	0.697672	0.434105	0.623683	0.617707	0.614323	0.49566	0.612015	0.747528
131	Hydroxyisocaproic acid	161.882	131.072	NEG	0.428189	0.556675	0.620961	0.401862	0.354178	0.354179	0.403794	0.214413	0.359899	0.281247	0.256222	0.268887
132	Methyl isovanillate	144.906	181.051	NEG	1.7081	1.75228	1.42844	1.80476	1.78199	1.52106	1.25578	1.29243	1.40016	1.25406	1.22041	1.34644
133	Tridecanedioic acid	244.98	243.161	NEG	0.297678	0.229881	0.211555	0.250987	0.244776	0.228924	0.26221	0.238452	0.222956	0.220624	0.198613	0.294126
134	Schaftoside	168.669	565.152	POS	0.550616	0.857743	0.870198	0.42424	1.06543	1.02905	0.861038	0.852858	1.12984	0.890741	0.593084	0.701968
135	Alisol B 23-acetate	295.334	513.362	NEG	3.53295	3.2186	4.56943	4.09194	3.56492	5.11249	2.79209	4.03897	3.34391	3.40679	3.27203	3.27839
136	2,6-diaminohexanoic acid	20.8986	147.112	POS	0.00988362	0.00664616	0.00761935	0.0446175	0.017062	0.0138592	0.0170051	0.000241415	0.00174457	0.00187452	0.0107516	0.0140004
137	Gaultherin	47.8255	491.142	NEG	0.225965	0.461531	0.300665	0.256795	0.350883	0.287544	0.17088	0.144198	0.230899	0.284759	0.225357	0.126925
138	Scopolin	148.967	413.111	NEG	4.34923	10.9739	7.45869	7.20404	6.78341	4.3889	3.22032	5.66202	9.08222	5.27277	6.92779	4.01215
139	D-Glycero-D-galacto-heptitol	158.623	213.101	POS	0.117061	0.0832654	0.0693138	0.0945305	0.0765954	0.0824058	0.0788454	0.066359	0.06816	0.0661116	0.0775679	0.0832665
140	Phenobarbital	175.25	233.09	POS	0.0258483	0.0352572	0.0277554	0.0378913	0.0238476	0.0392121	0.052992	0.0551631	0.0646248	0.0453894	0.056754	0.0560933
141	Deoxyshikonin	178.04	271.099	NEG	1.39723	1.12232	1.20203	1.483	1.58377	1.34853	1.24517	1.36583	1.27781	1.14978	1.11598	1.36338
142	Fraxidin	158.015	223.059	POS	0.0634717	0.17716	0.191031	0.0542014	0.0940828	0.102217	0.0880031	0.110089	0.127994	0.0757031	0.0978553	0.124828
143	PE(18:2/18:2)	319.237	738.513	NEG	6.15359e-05	0.154911	0.138383	0.146364	0.0869828	0.184981	0.171681	0.23058	0.113964	0.262485	0.193561	0.134205
144	Aloesin	141.809	393.123	NEG	0.261516	0.249718	0.218904	0.28016	0.30894	0.202581	0.221868	0.206543	0.204448	0.227071	0.209228	0.230182
145	Pogostone	203.712	241.109	NEG	1.13082	0.713985	0.626067	1.24454	1.59688	0.799962	0.367268	0.241952	0.485013	0.438377	0.353468	0.26729
146	Isovanillin	170.78	151.041	NEG	8.30956	9.17503	7.29533	9.81484	9.61878	8.0011	6.45844	5.59528	6.7619	6.24548	5.58255	5.49381
147	LPA(18:1)	344.739	435.255	NEG	0.119323	0.125413	0.160329	0.13376	0.120728	0.124557	0.224276	0.211483	0.250756	0.196054	0.305184	0.337479
148	Quinaldic acid	41.547	172.041	NEG	0.596926	0.698517	0.630938	0.743282	0.670428	0.59051	0.562682	0.603228	0.668902	0.656595	0.655819	0.623051
150	Dihydrojasmonic acid	233.029	211.135	NEG	1.3866	1.44977	1.19921	1.77933	1.83796	1.55336	0.827005	0.774785	1.12103	0.938668	0.721222	0.709123
151	Estrone glucuronide	237.707	445.188	NEG	2.48658	2.71121	1.94753	2.58167	2.74777	2.60366	3.49861	1.74284	1.10663	1.76812	1.78031	4.77245
152	Astragalin	172.586	449.104	POS	5.76592	7.75914	4.33982	6.05435	6.2285	5.67181	4.70874	5.94967	7.76123	6.10623	7.18668	6.09249
153	Canrenone	339.74	339.202	NEG	4.07867	9.6787	5.97918	5.92443	6.39718	6.67991	8.55474	6.25188	6.98742	6.15867	6.52141	7.35261
154	PC(9:0/26:4)	350.16	768.547	POS	0.0182263	0.00997647	0.0141017	0.00866163	0.0079986	0.0132841	0.026085	0.0304767	0.01925	0.0147311	0.0228565	0.018114
155	LPC(16:0)	290.29	554.349	NEG	0.422667	0.500017	0.332842	0.477672	0.792619	0.341614	0.362111	0.350832	0.484236	0.47478	0.352852	0.319391
156	Spiraeoside	184.554	465.1	POS	0.0764842	0.601746	0.178136	0.0857308	0.143544	0.170311	0.185706	0.181403	0.216595	0.185875	0.288326	0.201781
157	Morin	183.331	301.037	NEG	48.5529	101.199	76.2367	53.3217	87.2463	46.9472	45.8824	58.3818	49.6853	53.1734	49.1315	54.6321
158	Liquiritigenin	223.772	255.068	NEG	0.914985	1.27355	0.903843	1.15207	0.91181	0.457806	0.458283	0.502278	0.673354	0.327284	0.351297	0.501241
159	Delphinidin 3-glucoside	184.646	464.093	NEG	0.723323	3.55407	1.23067	0.73136	1.0588	1.20364	1.25842	1.37696	1.52933	1.31854	1.90467	1.54194
160	Silibinin	190.743	483.125	POS	0.0497287	0.124099	0.116086	0.0743542	0.101253	0.0545897	0.0657161	0.0582691	0.0527176	0.0457006	0.0489	0.0681435
161	Isosteviol	260.903	317.214	NEG	0.646819	0.582226	0.710637	0.584599	0.595834	0.698363	0.899955	0.971118	0.717389	0.643015	0.875517	0.965003
162	LPA(16:0)	345.036	409.239	NEG	0.262329	0.480992	0.545515	0.40991	0.440264	0.349677	0.434399	0.578483	0.46201	0.398609	0.451389	0.449073
163	Amarogentin	135.302	603.175	NEG	0.00841219	0.00586297	0.00706153	0.0106959	0.0138719	0.00805104	0.00959624	0.00692758	0.00920894	0.00898773	0.016527	0.00968428
164	2-acetyl-1-alkyl-sn-glycero-3-phosphocholine	305.794	524.368	POS	0.0886574	0.0852748	0.0601038	0.0963518	0.120078	0.0776878	0.075001	0.0666945	0.0740061	0.0784389	0.0693123	0.0651084
165	Sebacic acid	213.045	201.114	NEG	0.921631	0.772116	0.690171	1.03405	0.893453	0.702935	0.602981	0.521697	0.58299	0.600954	0.538605	0.591126
166	Isoquercitrin	137.506	463.091	NEG	0.0213071	0.0329378	0.0215723	0.0534675	0.00546837	0.0043341	0.0176766	0.0181207	0.0172539	0.0146223	0.0179111	0.0139057
167	Orientin	191.845	449.106	POS	0.196068	0.447577	0.153174	0.20516	0.213417	0.227487	0.274329	0.237223	0.310798	0.317824	0.358596	0.245645
169	Isorhamnetin	225.119	317.063	POS	0.0688438	0.200764	0.111475	0.0817233	0.096185	0.106895	0.0939107	0.111212	0.0997409	0.113595	0.13281	0.110737
170	Eupafolin	211.09	317.063	POS	0.617442	2.63754	0.79492	0.361304	0.586993	1.20226	0.993865	1.31539	1.47796	1.24922	2.11913	1.24628
171	2-Oxovaleric acid	42.08	115.041	NEG	0.25835	0.630878	0.41505	0.438548	0.401533	0.23307	0.158091	0.249567	0.197474	0.307591	0.194714	0.223395
172	Bryodulcosigenin	288.093	533.388	NEG	1.20045	1.30677	1.34061	1.2219	1.47265	1.49573	0.958767	1.13199	1.1909	1.38328	1.37925	1.52933
174	5-Hydroxyoxindole	163.649	148.041	NEG	0.273993	0.408872	0.483057	0.191324	0.2001	0.328627	0.217161	0.27476	0.271899	0.255241	0.172599	0.185669
175	Naringenin chalcone	213.882	271.062	NEG	4.23416	9.77403	8.19734	5.4432	6.29814	4.72676	4.05593	5.01791	5.68225	5.75088	4.15589	4.22034
177	Neodiosmin	177.25	609.178	POS	0.160149	0.178236	0.0858292	0.169442	0.105	0.136369	0.150738	0.110095	0.163417	0.118042	0.15816	0.133044
178	Itaconic acid	45.0588	129.02	NEG	0.406728	0.597973	0.53877	0.493724	0.447601	0.395052	0.373668	0.337277	0.378997	0.338761	0.328549	0.343866
179	(Z)-2,6,10-Bisabolatriene	308.382	205.193	POS	0.0118493	0.0110297	0.00752293	0.0112002	0.0149346	0.0117919	0.00902282	0.00657383	0.00878691	0.00896968	0.0108982	0.0123583
180	Glyceraldehyde	24.9488	89.0247	NEG	2.72952	2.98035	3.07057	3.01347	3.08134	2.61214	2.62768	2.67924	2.70121	2.56151	2.45425	2.61595
181	Typhaneoside	99.1941	769.236	NEG	0.0543709	0.0390418	0.0542918	0.0294721	0.0505967	0.0171446	0.061979	0.0843921	0.0488043	0.056491	0.0675901	0.0837768
182	Cinobufagin	249.614	460.265	POS	0.094564	0.0998946	0.0850335	0.0881275	0.102336	0.0995813	0.138582	0.0737536	0.0428178	0.0746856	0.0742453	0.168277
183	Macaridine	357.693	216.098	POS	0.00641626	0.0059435	0.00483246	0.00604844	0.00851712	0.00603831	0.00417047	0.00724196	0.00425121	0.00433935	0.00740605	0.00519645
184	Nordiazepam	219.79	271.058	POS	0.166101	0.119207	0.0893037	0.121113	0.194075	0.14938	0.169921	0.163467	0.187225	0.108721	0.14859	0.169072
185	LPC(18:0)	301.852	582.389	NEG	0.40404	0.512821	0.501663	0.421744	0.444273	0.481645	0.391424	0.398943	0.350371	0.401657	0.33007	0.449499
186	PC(10:0/26:2)	334.015	786.586	POS	0.000945109	0.0212133	0.0193663	0.0270335	0.0124865	0.0248975	0.0289932	0.0263742	0.0152103	0.0267938	0.023469	0.017094
187	5,7-Dimethoxyluteolin	305.282	313.08	NEG	0.0269212	0.0155462	0.0182743	0.0179577	0.0259377	0.00943717	0.0214157	0.0186686	0.0164904	0.0151738	0.0190218	0.0041353
189	Glycine	24.4968	74.025	NEG	0.26773	0.239366	0.313309	0.324503	0.351542	0.245956	0.306835	0.320637	0.279763	0.284067	0.310626	0.353231
190	PC(16:4/24:4)	295.897	830.548	POS	0.00382229	0.00499865	0.00835367	0.00448834	0.00456236	0.00337858	0.00499347	0.00357168	0.00586451	0.00452866	0.00282945	0.00388753
191	2-Amino-5-phenylpyridine	148.131	171.09	POS	0.382704	0.363256	0.301525	0.425046	0.301637	0.344328	0.320864	0.280101	0.349489	0.3066	0.29373	0.281941
192	Succinic anhydride	71.7871	99.0092	NEG	0.0628325	0.0549117	0.0767893	0.075396	0.0780182	0.0889581	0.0613998	0.0344925	0.0764892	0.0699986	0.0711528	0.0504774
193	Vericiguat	90.7648	425.125	NEG	0.322545	0.580551	0.122236	0.743073	0.28629	0.703202	0.526702	0.265166	0.611162	0.192968	0.33346	0.279366
194	Tezacaftor	172.839	579.212	NEG	3.07284	4.55434	4.07804	4.38876	5.84694	3.50501	3.75255	3.40136	3.44329	5.48732	3.51802	2.66646
195	LPG(16:0)	341.082	483.276	NEG	0.221755	0.424195	0.44499	0.693171	0.999578	0.459755	0.370454	0.303088	0.391639	0.370734	0.401483	0.387543
196	Monobutyl phthalate	272.766	205.084	POS	0.0426565	0.0381451	0.0480621	0.0494849	0.0459404	0.0434868	0.0431515	0.0429693	0.0504538	0.0403788	0.0387005	0.0466707
197	(E)-Methyl 4-coumarate	197.846	179.069	POS	0.313758	0.339502	0.326278	0.320933	0.632053	0.330006	0.555646	0.306041	0.34671	0.281951	0.521574	0.528985
198	DEHP	321.298	391.281	POS	0.0356398	0.0275179	0.0341774	0.0245532	0.0418254	0.0581668	0.038495	0.0419508	0.0377918	0.029694	0.0250393	0.0366835
199	13,21-Dihydroeurycomanone	137.439	409.152	NEG	2.91507	3.97685	3.2446	3.98427	5.29721	3.10032	3.20876	2.79538	3.36792	3.03002	2.85193	2.72398
200	LPE(18:3)	272.179	474.264	NEG	0.146948	0.103763	0.148276	0.112429	0.201789	0.113458	0.133995	0.128059	0.137697	0.105292	0.12941	0.172375
201	N-Acetyl-glucosamine 1-phosphate	29.8872	300.05	NEG	0.0997387	0.197178	0.200046	0.163003	0.168415	0.0823617	0.258546	0.207926	0.347192	0.281817	0.276582	0.299875
202	Octadecanedioic acid	261.616	313.239	NEG	5.90528	6.49052	5.54811	6.36737	5.74093	7.42407	5.212	4.60544	5.42609	6.12645	4.77832	5.20493
203	Ketoleucine	17.4372	129.056	NEG	0.107951	0.134838	0.127551	0.119604	0.117412	0.123445	0.0806967	0.128037	0.122523	0.128915	0.0856547	0.117277
204	Panaxatriol	296.978	477.403	POS	0.0123375	0.104913	0.140549	0.0978086	0.145076	0.0892311	0.0709066	0.1405	0.11027	0.136703	0.224703	0.130996
205	Levonordefrin	41.7848	166.085	POS	0.0590855	0.0717492	0.0853447	0.0999054	0.112689	0.0683692	0.0658939	0.0512219	0.0586829	0.0483301	0.0525763	0.0632675
206	Cortisol	257.531	361.203	NEG	0.0844524	0.075937	0.0885388	0.0874018	0.0592548	0.123549	0.0875127	0.0662686	0.0796957	0.0694105	0.0817384	0.0867374
207	Ergosterol	323.63	379.334	POS	0.120995	0.0790014	0.102107	0.08773	0.124169	0.0939302	0.110683	0.110278	0.077239	0.0976344	0.110637	0.119333
208	2-Hydroxycinnamic acid	148.11	163.041	NEG	1.57217	2.25404	1.62687	1.59146	2.07469	1.47719	1.50254	1.31121	1.58373	1.58267	1.51003	1.57028
209	Nodakenin	52.6725	407.137	NEG	0.00910516	0.0135509	0.00712366	0.0163562	0.041061	0.0135984	0.0150634	0.00811937	0.00993297	0.0109481	0.0109747	0.00465231
210	Paeonol	186.111	167.069	POS	0.16112	0.291238	0.198334	0.547081	0.233331	0.16702	0.155187	0.167196	0.195486	0.171409	0.16804	0.159791
211	Daidzin	192.548	415.106	NEG	0.794283	0.726665	0.446561	0.724442	0.553493	1.05501	0.400321	0.28386	0.811324	0.371758	0.53148	0.34147
212	8-Azaguanine	41.7555	151.041	NEG	0.373098	0.601852	0.562805	0.527704	0.460643	0.479908	0.468187	0.514876	0.517824	0.500151	0.471875	0.532048
213	(-)-Syringaresinol	176.602	401.154	POS	0.218592	0.313212	0.253497	0.235661	0.273917	0.272972	0.226329	0.212194	0.244064	0.237955	0.225321	0.204108
214	Adenosine monophosphate	34.7056	348.068	POS	0.0022935	0.00983075	0.00575199	0.00592694	0.00633453	0.0054602	0.0108922	0.0156645	0.00766827	0.00832904	0.0104803	0.0168568
215	alpha-Asarone	285.279	209.115	POS	0.0856077	0.0791094	0.0793963	0.0764906	0.0678217	0.0825008	0.0838895	0.0853497	0.128143	0.0819156	0.0821172	0.0652979
216	3-Hydroxydecanoic acid	252.322	187.135	NEG	0.0978754	0.129095	0.0990182	0.11579	0.0893481	0.0914348	0.0866386	0.11356	0.0894903	0.100084	0.0873592	0.0851591
218	Cer/NS(d18:2/16:1)	336.196	534.485	POS	0.000664676	0.238062	0.223348	0.196381	0.259264	0.17287	0.199514	0.170056	0.260301	0.150615	0.221642	0.262266
220	Cefuroxime (sodium)	162.582	442.104	POS	0.0433316	0.0476696	0.0387341	0.0317545	0.0299583	0.0195537	0.0201341	0.0288849	0.0349554	0.0195391	0.0427943	0.0231953
221	Carabrone	309.603	265.15	NEG	0.154249	0.572942	0.538427	0.189038	0.328422	0.20209	0.386615	0.539536	0.459686	0.475977	0.464935	0.530486
222	Ganoderic acid G	239.713	531.299	NEG	0.561089	0.164375	0.274148	0.181412	0.165174	0.319465	0.627797	0.598487	0.464428	0.824156	0.725983	0.765114
223	Epicatechin	57.9926	291.084	POS	0.0261265	0.0630093	0.0257265	0.0212179	0.0195879	0.0357649	0.0324048	0.042343	0.0388656	0.0804443	0.0396608	0.0628835
224	Mesalazine	219.744	152.036	NEG	1.15229	0.597723	0.715147	1.13209	1.04814	0.792006	0.644785	0.707237	0.597593	0.504198	0.743909	0.500694
225	1,4-D-Gulonolactone	26.7252	195.052	NEG	4.97954	15.415	8.61787	11.3123	10.6815	4.45819	3.95529	2.96568	4.5392	2.87909	2.20945	2.36921
226	Salsolidine	130.019	208.132	POS	0.0106365	0.0113818	0.0107991	0.0116533	0.0117117	0.0110138	0.0110923	0.00896899	0.0106593	0.0101748	0.0112687	0.0117075
227	4,6-Dioxoheptanoic acid	59.4106	157.051	NEG	0.185872	0.126405	0.134294	0.138514	0.114157	0.11515	0.1847	0.172066	0.174317	0.165292	0.176842	0.175301
228	Eriodictyol	175.332	289.069	POS	0.0699931	0.164801	0.0595215	0.0839235	0.0786432	0.0496792	0.0729231	0.066713	0.0774456	0.058794	0.0890256	0.0969501
229	Magnolioside	149.131	353.089	NEG	0.858303	1.98573	1.28385	1.27853	1.25702	0.863656	0.7146	1.14615	1.55097	2.14411	1.36493	0.974094
230	Podecdysone B	292.099	485.287	POS	0.0562602	0.0518249	0.0645369	0.066659	0.0551846	0.0752662	0.0541808	0.0527655	0.0618148	0.0572509	0.233193	0.311744
231	Vitexin 2''-O-rhamnoside	178.137	579.167	POS	1.6439	2.66242	1.06391	1.79829	1.3533	1.46696	1.61365	1.4836	1.74968	1.38154	1.80647	1.28345
232	Sinapyl alcohol	197.175	193.085	POS	0.141203	0.168018	0.136699	0.149069	0.152853	0.132028	0.154967	0.147514	0.149318	0.135222	0.106839	0.13058
233	20-Hydroxyeicosatetraenoic acid	275.481	319.229	NEG	0.173804	0.218819	0.210086	0.181295	0.163238	0.223472	0.257691	0.263572	0.184302	0.225103	0.248591	0.248947
234	Dihydrosinapic acid	27.416	227.09	POS	0.0220627	0.0332272	0.0226279	0.0314034	0.0499351	0.0173685	0.00951887	0.0101274	0.0122967	0.01055	0.00847518	0.0115027
235	FAHFA(13:1/15:1)	343.378	449.365	NEG	0.189656	0.0956644	0.0940408	0.104913	0.0943384	0.110881	0.0676008	0.0982744	0.0715209	0.0727809	0.0980076	0.0835203
236	Ginkgolide J	131.591	441.142	NEG	0.436027	0.510965	0.232823	0.573734	0.567374	0.266589	0.167827	0.225866	0.207781	0.249164	0.175523	0.22419
237	4-Hydroxycinnamic acid	181.357	163.041	NEG	0.555619	0.687656	0.478534	0.405811	0.73866	0.59794	0.272877	0.30325	0.400817	0.587472	0.441403	0.399829
239	Methyl phenylacetate	175.933	151.074	POS	0.174824	0.255063	0.182741	0.206541	0.217994	0.222323	0.210126	0.186679	0.20973	0.187437	0.180608	0.161254
240	LPC(18:2)	279.437	578.348	NEG	1.03562	0.555661	0.916594	0.660201	1.07382	0.659899	1.05852	1.16622	0.96736	0.981609	1.101	1.41389
241	PE(18:2/18:3)	348.395	736.494	NEG	0.170649	0.13627	0.134556	0.135288	0.183963	0.132632	0.167057	0.174116	0.146725	0.103329	0.1382	0.12901
242	Isoliquiritigenin	223.786	257.078	POS	0.0469549	0.0639278	0.0445029	0.0543033	0.0406097	0.0259525	0.0250064	0.0227615	0.0347452	0.0161966	0.016787	0.0273126
243	Chavicol	16.86	135.079	POS	0.0673745	0.0691465	0.0700187	0.0701117	0.0682888	0.074105	0.0715193	0.0655833	0.0699489	0.0651744	0.0720153	0.0725746
245	Coniferyl alcohol	151.929	167.069	POS	0.47068	0.712773	0.471704	0.577196	0.484375	0.481285	0.308954	0.328092	0.330885	0.399128	0.264992	0.361761
246	PC(15:1/22:6)	318.319	790.552	POS	0.0223161	0.0323106	0.0224141	0.0311441	0.0252624	0.0419089	0.0238379	0.0236743	0.0380804	0.0231343	0.0232126	0.0212585
247	D-Glutamine	24.6545	147.075	POS	0.596464	0.43426	0.581709	0.46179	0.647145	0.493608	0.60372	0.660312	0.581431	0.592294	0.637526	0.593768
248	Biochanin A	198.579	285.073	POS	0.458006	0.607524	0.312976	0.465733	0.676587	0.367721	0.377767	0.46389	0.996451	0.236888	0.321561	0.487015
249	4-Hydroxychalcone	178.176	225.089	POS	0.0475503	0.0451882	0.0174265	0.0388641	0.0478903	0.0234418	0.0201803	0.0286133	0.027012	0.0265769	0.0178248	0.0302678
250	Dehydrophytosphingosine	243.006	316.282	POS	1.99589	1.93287	2.77694	1.5676	2.69868	2.67767	2.46315	2.29066	1.47759	2.74321	1.96304	2.44951
251	gamma-L-Glutamyl-L-pipecolic acid	42.5267	259.127	POS	0.0788479	0.122164	0.0925452	0.059081	0.105374	0.0851364	0.173143	0.108356	0.12441	0.0831255	0.125203	0.119296
252	Gallopamil (hydrochloride)	292.05	543.3	NEG	0.0541719	0.0492807	0.0615924	0.0600819	0.0536128	0.072926	0.0322032	0.0559388	0.0634032	0.0822616	0.208752	0.314771
253	Isoamyl salicylate	270.8	209.109	POS	0.0571036	0.0562433	0.0628451	0.0689383	0.0629801	0.0580399	0.0689938	0.0596035	0.0675778	0.0652826	0.0565952	0.0659987
254	5-Hydroxyindoleacetylglycine	31.3704	249.085	POS	0.0268251	0.0252005	0.0186472	0.028564	0.0298304	0.0185153	0.0188819	0.0170678	0.0218658	0.0197188	0.017297	0.0173813
255	Methyl Paraben	209.12	151.041	NEG	0.642813	0.655659	0.475904	0.577228	0.695683	0.506989	0.521513	0.477924	0.611339	0.808298	0.236446	0.491547
256	6-(alpha-D-Glucosaminyl)-1D-myo-inositol	22.166	342.137	POS	0.0160018	0.0139	0.0122262	0.0135111	0.0192723	0.0143577	0.0132019	0.00560484	0.0050342	0.00670705	0.00854302	0.0120685
257	Dihydroartemisinic acid	254.323	281.177	NEG	0.1883	0.134501	0.152379	0.180736	0.174095	0.162363	0.139533	0.148056	0.180218	0.206121	0.173236	0.164976
258	Desoxycortone	305.971	389.238	NEG	1.08011	1.13452	0.89671	0.91261	0.913352	0.811436	1.0389	1.17209	1.53153	1.02394	0.798984	0.79966
259	L-Arginine	22.5196	173.105	NEG	0.114972	0.0909641	0.175021	0.0669075	0.217745	0.168876	0.205184	0.0111579	0.0216521	0.00980474	0.0740144	0.22291
260	Hypoxanthine	26.0562	135.03	NEG	0.386454	0.882245	0.524721	0.615862	0.38959	0.229206	0.355133	0.256143	0.407461	0.252302	0.241567	0.262366
261	(+)-Maackiain	197.85	283.063	NEG	0.515086	0.306848	0.373013	0.344908	0.690841	0.317645	0.389923	0.385067	0.839473	0.370476	0.32753	0.264243
262	Iloprost	280.115	359.224	NEG	0.0516746	0.0664663	0.0802849	0.0461399	0.0371461	0.0827692	0.0512945	0.0702184	0.0612391	0.104655	0.0809871	0.0822415
264	Methylnissolin	193.848	299.094	NEG	0.885951	0.763671	0.953817	0.994768	0.975779	1.25899	1.5773	0.62583	1.20597	0.919892	1.28365	0.640783
265	Meconine	149.125	195.064	POS	0.0387194	0.0324428	0.0184044	0.0165189	0.0427861	0.034419	0.0136517	0.0115542	0.0253692	0.0110744	0.0167604	0.0139325
266	5'-Deoxyadenosine	50.9436	252.108	POS	0.016944	0.022736	0.0257024	0.0210305	0.0148613	0.0193811	0.015176	0.0114599	0.014708	0.0131244	0.0102641	0.0095162
267	PC(14:0/22:6)	332.933	778.533	POS	0.0428848	0.053621	0.0438616	0.0484234	0.0617528	0.0514208	0.0534194	0.053772	0.0407228	0.0289076	0.0399576	0.038976
269	2-Ketobutyric acid	42.4617	101.025	NEG	0.56262	0.76341	0.825831	0.594567	0.546481	0.902296	0.5156	0.970108	0.580553	0.456698	0.464719	1.12649
270	Epigallocatechin gallate	83.2828	457.078	NEG	0.00501376	0.0134726	0.00723265	0.00565315	0.00686688	0.00470183	0.00467286	0.00603301	0.00401999	0.0054584	0.00416993	0.00547783
271	Citrinin	157.681	267.089	NEG	0.629747	0.80837	0.974223	0.751649	0.651828	0.879966	0.798574	0.624157	0.885678	0.813121	0.717416	0.664661
272	Irenolone	75.2538	289.08	POS	0.0204314	0.0321253	0.0298143	0.00715632	0.00730617	0.0200032	0.0135057	0.0171828	0.0214378	0.0201069	0.0148727	0.0176599
273	Poncirin	131.828	593.176	NEG	0.0121272	0.0295505	0.0194895	0.0297256	0.0283364	0.0108183	0.00928501	0.00495376	0.0146332	0.00997388	0.0078151	0.0062063
274	5-hydroxy-2-phenyl-4H-chromen-4-one	53.0533	239.066	POS	0.0370343	0.0658927	0.0520012	0.0562803	0.0503451	0.0328649	0.0566448	0.0528266	0.0944055	0.054054	0.0413734	0.0350777
275	O-Ureidohomoserine	194.717	178.082	POS	0.00665532	0.00464307	0.00787709	0.00494054	0.00634917	0.00424156	0.0039745	0.00584646	0.00317805	0.00613321	0.00474783	0.00579788
277	Myo-Inositol	26.0562	179.057	NEG	1.83368	3.13953	2.52938	2.5399	2.16596	1.63394	1.35627	1.09885	1.82744	1.2638	1.16899	1.22197
278	PC(18:5e/13:1)	310.303	694.49	POS	0.0205827	0.0280427	0.0322089	0.0151687	0.00648476	0.0467945	0.0318928	0.0171314	0.0282625	0.0200143	0.0304985	0.034998
279	Pinoresinol	173.951	341.136	POS	1.33234	1.8696	2.02589	2.08057	2.00061	1.54934	1.68123	1.42305	1.68007	2.17158	2.01963	1.41316
280	cis-9,10-Epoxystearic acid	303.313	297.244	NEG	0.253985	0.251308	0.233882	0.33685	0.379614	0.206365	0.221782	0.237928	0.231505	0.198106	0.198612	0.891133
281	3,6-Dimethoxy-4-phenanthrenol	143.95	255.1	POS	0.0556796	0.0530276	0.0489274	0.0548577	0.0590542	0.0520927	0.0423374	0.0489955	0.0469357	0.0492087	0.0435581	0.0523171
282	Bilobalide A	146.791	325.095	NEG	0.613855	1.05653	0.753142	0.762209	0.895172	0.743841	0.551543	0.53742	0.67903	0.657677	0.511191	0.541094
283	(E)-Ethyl p-methoxycinnamate	177.261	207.1	POS	0.364652	0.496632	0.383686	0.4187	0.457596	0.471419	0.383029	0.349612	0.445864	0.375141	0.371589	0.288617
284	L-Carnitine	23.9945	162.111	POS	0.216443	0.129776	0.180514	0.142077	0.232014	0.168035	0.260712	0.247771	0.19946	0.193577	0.264155	0.269376
285	Thiazopyr	90.9314	397.105	POS	0.0183493	0.0216604	0.00659712	0.0380653	0.00260505	0.0129078	0.0129202	0.00700749	0.0158604	0.00894872	0.010154	0.00605124
286	Dihydro-4-mercapto-3(2H)-furanone	21.5505	119.018	POS	0.0696137	0.0793555	0.0945112	0.0485767	0.0658667	0.181868	0.114085	0.027999	0.0657746	0.0381186	0.0445164	0.0562181
287	Medicarpin	189.282	315.089	NEG	2.14898	1.71205	1.94772	1.86924	2.01516	1.79782	2.2027	2.23317	1.95198	2.26847	2.29094	2.30819
288	Suberic acid	181.358	173.083	NEG	1.12025	0.952871	0.998715	1.04821	0.997431	0.640611	0.525221	0.329561	0.689317	0.547126	0.414794	0.492471
289	2-(3,4-dihydroxyphenyl)-3,5,7-trihydroxy-3,4-dihydro-2H-1-benzopyran-4-one	183.228	305.064	POS	0.119207	0.264566	0.225339	0.136321	0.1947	0.122286	0.133627	0.17673	0.146821	0.1698	0.142203	0.158987
290	5,7-Dimethoxyflavone	193.965	281.083	NEG	1.43924	1.13155	1.00998	1.31918	1.44519	0.902419	0.854986	0.996858	0.988423	0.986553	0.907011	1.16523
291	Pinoresinol 4-O-β-D-glucopyranoside	177.396	519.19	NEG	0.730995	1.41284	0.964285	1.09065	1.13887	1.2706	0.686437	0.730153	0.907557	1.11133	0.709052	0.502093
292	PC(8:0/26:2)	334.195	758.562	POS	0.0033733	0.158033	0.124802	0.144434	0.11776	0.130706	0.154348	0.177332	0.0929804	0.15765	0.156924	0.118131
293	Di-2-furanylmethane	151.45	149.059	POS	0.192837	0.252073	0.144287	0.206145	0.183537	0.170163	0.13169	0.129606	0.158469	0.150263	0.119878	0.127655
294	PA(18:2/18:3)	351.165	693.455	NEG	0.0570982	0.168855	0.145275	0.137179	0.0358183	0.146297	0.16087	0.166175	0.202328	0.191499	0.225626	0.238402
295	2,6-Dimethoxy-4-phenanthrenol	177.726	255.1	POS	0.195594	0.20553	0.157772	0.33394	0.243296	0.176056	0.149694	0.146557	0.16495	0.139498	0.141603	0.14532
296	Formylanthranilic acid	174.795	164.036	NEG	1.94066	1.73679	2.61124	2.02465	1.51003	2.39941	2.09871	1.31759	2.08613	2.05485	1.92291	2.2672
297	Hispolone	83.3118	221.08	POS	0.135457	0.103588	0.0827384	0.138014	0.0122028	0.110442	0.0825988	0.070726	0.0868186	0.0798603	0.0770348	0.074654
298	Rhamnocitrin	189.202	301.068	POS	0.364797	0.829255	0.291639	0.128964	0.605556	0.261732	0.335413	0.661993	0.522034	0.539516	0.370659	0.375448
299	12-Hydroxystearic acid	324.487	299.261	NEG	1.17912	0.545781	0.497802	0.956008	1.1356	0.487834	0.565801	0.586666	0.490951	0.419399	0.744286	0.505945
300	Cytochalasin Ppho	288.603	512.311	POS	0.133584	0.114373	0.112937	0.114533	0.109973	0.121512	0.126889	0.126	0.178287	0.125366	0.112098	0.0975548
301	Prostaglandin J2	237.105	333.209	NEG	0.317777	0.305178	0.5014	0.280945	0.425804	0.336892	0.461569	0.760683	0.557952	0.509177	0.6239	1.05725
302	Aurantio-obtusin	202.46	331.079	POS	0.242416	0.490433	0.30514	0.223284	0.304618	0.204625	0.188608	0.215543	0.211967	0.195674	0.177928	0.238635
303	8-​O-​Acetylharpagide	149.851	405.142	NEG	0.523191	0.95944	0.655011	0.560213	0.575056	0.385262	0.494566	0.381784	0.357364	0.497671	0.377568	0.400002
304	Cyanidin 3-glucoside	29.7126	447.094	NEG	0.0114733	0.0185051	0.019677	0.0172521	0.0092318	0.0125207	0.0109479	0.0134688	0.0136289	0.0116078	0.0146278	0.0120151
306	3-Dehydroteasterone	344.536	447.344	POS	0.00755808	1.47858e-05	0.00377562	0.0117835	0.0215764	0.00181237	0.00269193	0.00471882	0.00238311	0.00357518	0.000502907	0.00737313
307	(-)-Catechin	152.921	289.073	NEG	0.24666	0.619129	0.239232	0.283896	0.386088	0.300742	0.350299	0.476705	0.42366	0.829962	0.389273	0.511665
309	Alpha-dimorphecolic acid	276.8	295.229	NEG	93.9442	89.5636	78.4111	129.345	153.782	98.3511	55.374	54.6099	67.3658	56.6201	50.3268	59.3139
310	N-acetyl-5-aminosalicylic acid	145.518	194.047	NEG	0.263693	0.270102	0.323276	0.291634	0.236025	0.222982	0.301462	0.43109	0.319421	0.344419	0.326133	0.353445
311	8-Epiloganic acid	133.747	375.131	NEG	0.182994	0.37841	0.262115	0.180283	0.295687	0.219717	0.18028	0.132859	0.135487	0.131857	0.0967625	0.104584
312	3-(3-Hydroxyphenyl)propanoic acid	152.045	165.057	NEG	5.53131	6.37115	4.08144	8.4044	5.85181	6.68938	2.86822	2.68434	3.74557	3.37507	2.74236	3.03277
313	Iristectorin A	149.622	491.123	NEG	0.29872	0.815626	0.347424	0.376551	0.406409	0.226568	0.0986796	0.199133	0.3749	0.245939	0.234237	0.157822
314	Gentisate aldehyde	174.376	139.038	POS	0.0344814	0.0288185	0.0191799	0.0328472	0.0439881	0.033656	0.0382389	0.0233058	0.0289391	0.0319201	0.0361003	0.0370622
315	2,3-Dihydroxy-1-(4-hydroxy-3-methoxyphenyl)-1-propanone	80.5576	213.074	POS	0.244013	0.233746	0.194398	0.215222	0.213683	0.197548	0.192838	0.165305	0.204703	0.183682	0.194343	0.160553
316	D-(+)-Melezitose	26.0562	503.164	NEG	0.221682	0.321505	0.412162	0.268335	0.257358	0.224256	0.221545	0.239415	0.289094	0.408871	0.227625	0.218416
317	2'-O-Methyladenosine	82.3568	282.118	POS	0.00845276	0.0118075	0.00797551	0.0192388	0.0396593	0.0079262	0.00397356	0.00289679	0.00481886	0.00284616	0.00358549	0.00344284
318	PC(8:0/26:4)	340.856	754.534	POS	0.00800624	0.00310382	0.00511546	0.00418784	0.0109499	0.00457032	0.00917151	0.00827117	0.00742478	0.00338421	0.00644557	0.00957656
319	2',4-Dihydroxy-4',6'-dimethoxy-3'-prenylchalcone	237.725	369.167	POS	0.0971534	0.105858	0.0727139	0.0943721	0.106669	0.103127	0.140822	0.065716	0.0453561	0.0648035	0.070101	0.18083
320	3,4,5-Trimethoxybenzoic acid	148.198	211.062	NEG	1.41943	1.67871	1.44683	1.49195	1.49667	1.24913	1.28205	1.31228	1.33666	1.31823	1.31204	1.31464
321	Dopamine	42.604	299.079	NEG	1.01592	1.4539	0.856774	1.39237	1.73376	0.847985	0.551473	0.934263	0.634701	1.21607	0.598635	1.14248
322	Hexadecanedioic acid	270.202	285.209	NEG	1.45761	1.31658	1.11371	1.6351	2.29657	1.39151	1.10038	1.02538	1.07289	0.937856	1.00447	1.0783
323	LPC(18:1)	290.069	580.37	NEG	0.193994	0.163017	0.138776	0.23493	0.444408	0.189068	0.132253	0.0577134	0.0593079	0.106551	0.109129	0.183062
324	[(2R,3S,4R,5R)-5-(2,4-dioxo-1,2,3,4-tetrahydropyrimidin-1-yl)-3,4-dihydroxyoxolan-2-yl]methyl {[(3R,4S,5S,6R)-3,4,5-trihydroxy-6-(hydroxymethyl)oxan-2-yl phosphonato]oxy}phosphonate	35.9638	565.052	NEG	0.974281	0.931159	1.14134	0.873368	1.42442	0.832163	1.35771	1.4286	1.26747	1.01232	1.39481	1.59966
325	Silychristin	166.045	483.125	POS	0.156197	0.365425	0.348698	0.213968	0.330737	0.155591	0.120993	0.191456	0.156049	0.148672	0.130047	0.153436
326	Mulberrin	254.968	421.158	NEG	0.476106	0.438355	0.456105	0.481928	0.392564	0.254993	0.386021	0.49902	0.726525	0.441891	0.375616	0.339763
327	Petunidin 3-gentiobioside	159.409	641.167	POS	0.00833101	0.0310758	0.0121533	0.00779885	0.0184081	0.0149902	0.00436409	0.00822829	0.0112164	0.00353154	0.0101694	0.0139442
328	Ricinoleic acid (purity≥99%)	272.183	315.255	NEG	1.2812	1.5376	2.01299	1.4776	1.97196	1.48224	2.30093	2.09344	2.6154	1.77304	1.17611	1.37116
329	L-Uridine	27.6556	243.063	NEG	0.642068	0.51318	0.563656	1.06522	1.19242	0.546146	0.48935	0.335396	0.499813	0.450341	0.437684	0.441325
330	Eupatorin	227.841	345.094	POS	0.00641993	0.0169913	0.0111269	0.00398406	0.00559771	0.0199166	0.0172636	0.0130355	0.00757396	0.00655136	0.015175	0.0117165
331	Gnetol	142.555	245.079	POS	0.018819	0.0658289	0.023874	0.0154512	0.0428058	0.0153031	0.049114	0.0310668	0.0312946	0.0444242	0.0466349	0.0290303
332	Phenol	285.959	95.0483	POS	0.0178774	0.0164788	0.0112431	0.015336	0.00930532	0.00738271	0.0154857	0.0160205	0.0242974	0.0134381	0.0130755	0.00662105
333	Diacetone alcohol	218.418	115.077	NEG	0.367352	0.421915	0.399302	0.394642	0.472876	0.336934	0.240436	0.28148	0.242506	0.226227	0.301031	0.251294
335	Saponarin	171.645	593.154	NEG	1.46396	3.02018	2.90663	2.04506	4.59276	1.92773	1.90342	1.70203	1.90608	1.61144	2.28526	1.61506
336	13-L-Hydroperoxylinoleic acid	258.241	295.224	POS	0.843681	0.769051	0.656307	0.975165	1.19119	0.88157	0.547726	0.450141	0.606279	0.508956	0.489953	0.563483
337	PA(18:2/18:2)	350.365	695.47	NEG	0.251224	0.303639	0.363595	0.0970582	0.150125	0.27175	0.345851	0.346897	0.175544	0.474453	0.319321	0.334476
338	15-Hydroxymarasmen-3-one	146.037	265.141	POS	0.0220633	0.0302033	0.0218851	0.0220491	0.0155602	0.0304677	0.0256668	0.0129671	0.02648	0.0201142	0.0149171	0.0128075
339	Silydianin	193.228	481.115	NEG	3.03151	6.86405	6.34757	4.93246	7.01424	3.23566	3.65759	3.50877	2.33294	2.79716	2.39895	4.69395
340	Quercetin 3-O-(6''-acetyl-glucoside)	190.603	505.101	NEG	0.426655	1.45539	0.324231	0.281827	0.371875	0.352553	0.393612	0.369457	0.588745	0.449014	0.655306	0.566309
341	5-Methyl-2(3H)-furanone	25.3427	99.0433	POS	0.0965952	0.0764911	0.0880934	0.0866579	0.101496	0.148319	0.0593985	0.10874	0.107666	0.111305	0.0780826	0.0884054
342	Phenylacetaldehyde	285.457	121.064	POS	0.460305	0.42291	0.417982	0.421213	0.399202	0.426344	0.502397	0.448644	0.641002	0.430368	0.390404	0.323716
343	FAHFA(2:0/18:0)	324.487	341.272	NEG	0.228593	0.0997729	0.54969	0.255777	0.207141	0.156949	0.103588	0.107632	0.413127	0.108716	0.124328	0.120116
344	Eplerenone	249.021	432.235	POS	0.267191	0.305378	0.195901	0.281256	0.306223	0.29348	0.430967	0.156135	0.110064	0.156914	0.203358	0.564319
345	Choline	23.0417	104.106	POS	1.09905	1.26334	1.29952	1.10332	1.19723	0.8697	1.29694	1.17563	1.18471	1.20035	1.33223	1.57426
346	Riboflavin	42.2684	375.131	NEG	0.134976	0.289045	0.158491	0.205077	0.125629	0.325715	0.133024	0.110069	0.138563	0.151883	0.144514	0.107032
347	5-Hydroxyenterolactone	55.0621	315.121	POS	0.0553998	0.0589404	0.0418723	0.0346583	0.0644171	0.0407239	0.0388341	0.0356315	0.0347465	0.0406591	0.0341276	0.0399516
348	Norambreinolide	258.245	251.198	POS	0.0472638	0.0443675	0.042197	0.0493001	0.0956681	0.053476	0.0519701	0.0524526	0.0440453	0.0820864	0.0616774	0.0508418
349	Tiotidine	35.8593	357.084	NEG	0.109726	0.259261	0.193631	0.154344	0.157282	0.159475	0.128735	0.112268	0.157723	0.135818	0.0880815	0.0739146
350	5-Hydroxytryptophol	170.548	178.085	POS	0.123563	0.133171	0.163529	0.146601	0.123957	0.159148	0.113618	0.162125	0.136549	0.14014	0.116828	0.133615
351	PA(16:0/18:2)	349.608	671.47	NEG	0.372534	0.714797	0.40912	0.410438	0.445517	0.299867	0.43093	0.507114	0.135993	0.700364	0.142918	0.472873
352	2,3-Butanediol	29.4911	73.0642	POS	0.0172255	0.017576	0.0198015	0.020657	0.0187637	0.0192726	0.0173415	0.0147962	0.0200382	0.0174957	0.0187909	0.0183811
353	Tricin	219.151	331.078	POS	0.0583812	0.188834	0.0975029	0.0422142	0.0609998	0.112276	0.0669718	0.102836	0.107338	0.0887737	0.115691	0.0899656
355	Alisol C 23-acetate	251.614	527.339	NEG	0.214422	0.203391	0.27948	0.203084	0.22849	0.302516	0.223191	0.224852	0.319905	0.270623	0.237571	0.216163
356	Monooleoylglycerol	346.808	391.255	NEG	0.928227	0.564882	0.667002	0.824213	0.707942	0.788499	0.395838	0.372879	0.527529	0.402975	0.369638	0.560966
357	Sphingosine 1-phosphate	284.045	378.244	NEG	0.373925	0.315195	0.394137	0.315757	0.372354	0.404456	0.36256	0.385272	0.406709	0.353893	0.29711	0.293629
358	HexCer/NS(d18:2/16:1)	316.414	696.536	POS	0.00118079	0.227911	0.194629	0.211954	0.222515	0.181724	0.197853	0.180209	0.300575	0.183038	0.240857	0.243818
359	4'-Hydroxyacetophenone	152.045	135.046	NEG	3.14926	3.55453	2.26077	3.13973	3.26929	2.33484	1.51675	1.4156	2.03563	1.90666	1.46284	1.69923
360	PE(16:0/18:2)	341.736	714.513	NEG	0.000887461	0.127246	0.101055	0.0935647	0.0843375	0.11236	0.123166	0.128119	0.0867007	0.120943	0.112261	0.110242
361	Entadamide-A-β-D-glucopyranoside	169.529	322.094	NEG	0.287299	0.372165	0.358923	0.514002	0.35871	0.482724	0.160809	0.184124	0.292358	0.191248	0.124921	0.174274
362	2,5-Dimethylfuran	122.799	97.0641	POS	0.084143	0.0836319	0.0847206	0.0838097	0.0837059	0.0784175	0.0798818	0.0804037	0.0829694	0.0836484	0.0831764	0.0824222
363	Phenylacetic acid	163.8	135.046	NEG	0.696921	0.683173	0.578358	0.681831	0.811919	0.541892	0.461061	0.482957	0.515169	0.514873	0.47741	0.565899
364	L-Kynurenine	96.9491	191.08	POS	0.00516174	0.0102421	0.00905308	0.00967769	0.00875379	0.00946126	0.00330169	0.00758462	0.00609801	0.00482576	0.00752402	0.00323523
365	2,3,9-Trimethoxypterocarpan	130.799	315.121	POS	0.0353553	0.0364401	0.02546	0.0301505	0.0491861	0.0224514	0.0219881	0.0183213	0.0249486	0.0251462	0.0205799	0.024498
366	Biorobin	171.956	595.163	POS	0.18236	0.317962	0.136604	0.220419	0.599484	0.274903	0.221239	0.19603	0.205911	0.171041	0.246976	0.176916
367	Methyl 5-hydroxypyridine-2-carboxylate	207.092	152.036	NEG	0.509604	0.317456	0.261828	0.24019	0.20467	0.26844	0.390766	0.37326	0.280776	0.333476	0.329276	0.424527
368	Nardosinone	235.675	249.151	NEG	0.671187	0.464573	0.745283	0.627111	0.56148	0.471318	0.625135	0.524242	0.449511	0.560348	0.528478	0.642519
369	Gomisin D	155.423	531.208	POS	0.013459	0.0161858	0.0129072	0.0172152	0.0248014	0.0127926	0.016677	0.013646	0.012401	0.0138411	0.0179338	0.0152518
370	Hydroxyprolyl-Methionine	30.0007	263.1	POS	0.0146066	0.0180169	0.0106654	0.0183477	0.018847	0.0127707	0.0109854	0.00629025	0.0118234	0.00893317	0.0115329	0.00672139
372	Gingerol	320.611	293.181	NEG	0.406565	0.534815	0.577837	0.4561	0.394908	0.460567	0.457246	0.521421	0.496341	0.54671	0.433738	0.540318
375	Lactose	24.3658	365.104	POS	0.190719	0.150465	0.254625	0.163416	0.208438	0.135402	0.107334	0.142218	0.134406	0.104271	0.112419	0.135689
376	PS(16:0/18:3(9Z,12Z,15Z))	284.62	758.494	POS	0.0310361	0.0299607	0.0345142	0.0253064	0.0241881	0.0330711	0.0244436	0.0295908	0.0333162	0.0334473	0.031223	0.0251042
377	L-beta-aspartyl-L-serine	151.541	221.079	POS	0.107273	0.114207	0.0987551	0.1006	0.111751	0.0952339	0.091219	0.0869265	0.0974223	0.0912244	0.0859149	0.0946981
378	Darexaban	249.573	473.221	NEG	1.49469	1.71337	1.21664	1.60276	1.68549	1.66933	2.32317	0.925896	0.662177	0.991935	1.11811	3.05476
379	7-Amino-4-methylcoumarin	179.364	174.057	NEG	2.88207	2.57633	3.21696	3.48897	2.15151	3.32747	2.23825	1.76391	2.11055	1.58954	1.34127	1.59655
381	1,2,3-Trihydroxybenzene	26.7483	125.025	NEG	0.235488	0.492841	0.36585	0.306025	0.188201	0.199586	0.221697	0.150886	0.262923	0.223596	0.200616	0.208118
382	FAHFA(2:0/24:4)	275.488	417.303	NEG	0.295925	0.285517	0.296033	0.312916	0.249463	0.33388	0.305365	0.319784	0.293936	0.323974	0.304671	0.315139
383	7-Ketodeoxycholic acid	258.191	405.266	NEG	0.314179	0.218392	0.233652	0.251276	0.134202	0.244851	0.520006	0.264046	0.195166	0.23955	0.53747	0.593888
384	Docosanamide	275.75	340.354	POS	0.00415527	1.43116	1.62477	2.08243	1.52087	0.928996	2.48167	2.50763	1.59957	1.69557	0.945232	1.68151
385	(10)-Gingerol	249.66	395.245	NEG	0.26841	0.25832	0.236172	0.290209	0.303989	0.269648	0.389974	0.421344	0.280974	0.417444	0.298321	0.399928
387	LDGTS(18:2)	283.473	498.374	POS	0.169962	0.0718589	0.105987	0.134203	0.105931	0.154324	0.0885323	0.0785326	0.108028	0.0726151	0.0273597	0.0557032
388	7-Hydroxy-1,7-bis(4-hydroxy-3-methoxyphenyl)-1-heptene-3,5-dione	197.122	387.141	POS	0.568366	0.966003	0.793883	0.714937	0.944197	0.693055	0.588097	0.652357	0.717037	0.719373	0.66076	0.742927
389	Quercetin	257.891	301.037	NEG	0.450602	0.991451	0.83256	0.520902	0.608732	0.506344	0.511762	0.399909	0.509613	0.384328	0.546449	0.623611
390	Dodecyl gallate	297.351	337.204	NEG	0.161488	0.216709	0.180618	0.14342	0.145214	0.223011	0.197335	0.220574	0.193297	0.26434	0.217864	0.244561
391	Eremopetasinorone A	232.399	207.136	POS	0.0510953	0.0487374	0.0595466	0.0643822	0.136062	0.0482275	0.0456235	0.040652	0.052536	0.056238	0.0490588	0.076522
392	Batatasin I	147.193	285.11	POS	0.133211	0.151934	0.140962	0.131731	0.148185	0.152951	0.134077	0.1213	0.135978	0.13885	0.128544	0.125703
393	PE(8:0/26:2)	341.56	716.516	POS	1.51574e-05	0.0158494	0.0130643	0.0105766	0.0100823	0.0116703	0.0126529	0.0143014	0.00986105	0.0132357	0.00976317	0.0115232
394	Dehydrodiisoeugenol	187.715	327.157	POS	1.51574e-05	0.33104	0.323636	0.0688466	0.325583	0.313082	0.224388	0.207219	0.328787	0.208749	0.273088	1.47125e-05
395	β-Ionone	309.843	193.157	POS	0.0881864	0.0606784	0.041999	0.0811285	0.0546393	0.0497208	0.129535	0.135737	0.0368172	0.105607	0.0449647	0.0769683
396	Irisolidone	195.999	315.084	POS	0.587222	0.720018	0.401564	0.320483	0.752826	0.484612	0.705992	0.791226	0.735939	0.604046	0.727121	0.807314
397	PEtOH(25:0/18:3)	301.979	823.636	NEG	0.0780722	0.0915545	0.102617	0.11217	0.122602	0.0836799	0.068695	0.0654742	0.0593053	0.0625576	0.0441374	0.0794805
398	Eicosadienoic acid	313.74	309.277	POS	0.00386229	0.00621096	0.00965407	0.00632742	0.0096993	0.00715928	0.0132773	0.0107336	0.0188089	0.0108482	0.00470467	0.00704761
399	Homoplantaginin	178.597	463.12	POS	0.30385	0.371939	0.230606	0.278727	0.307601	0.267322	0.273987	0.288474	0.377284	0.246616	0.34914	0.331657
400	PC(10:0/26:1)	311.118	788.602	POS	0.01506	0.011028	0.0128477	0.0117306	0.0114005	0.00801404	0.0141912	0.0101532	0.0239146	0.0119894	0.0131709	0.00680647
401	Salidroside	139.756	359.136	NEG	1.86706	2.57801	0.687984	3.17956	0.789488	1.97395	1.35838	0.40968	1.27075	0.925327	0.888077	0.732242
402	1'-Hydroxychavicol acetate	138.571	193.084	POS	0.0917889	0.131945	0.0385303	0.287098	0.0992954	0.104194	0.0892252	0.0615994	0.101339	0.0271162	0.0536949	0.0641201
403	Melilotocarpan C	142.825	331.115	POS	0.11605	0.11895	0.192187	0.106283	0.146129	0.115631	0.133022	0.109058	0.167628	0.12783	0.111483	0.208515
404	hydnocarpin	227.097	463.107	NEG	1.12401	1.33853	0.734127	0.636019	1.19447	0.72691	1.54411	1.03466	1.55765	0.74424	0.928093	1.20277
405	Parecoxib	152.614	369.085	NEG	0.236432	0.817503	1.106	0.458577	0.704115	0.262277	0.346652	0.489142	1.10737	0.422386	0.454446	0.369126
407	β-Damascone	297.438	193.157	POS	0.0264704	0.0289006	0.0227614	0.0244562	0.0295681	0.0277149	0.0401178	0.0327221	0.0234407	0.0297566	0.0244221	0.0369727
408	Abscisic acid	202.446	247.131	POS	0.0193416	0.0142088	0.0150849	0.0241717	0.0128127	0.0493366	0.0292742	0.0103674	0.0184481	0.0152722	0.013409	0.0103368
409	Luteolin	13.0508	287.056	POS	0.00561962	0.00318445	0.00570058	0.00549729	0.00571833	0.00583442	0.00573706	0.00244678	0.00553557	0.00527502	0.00572942	0.0054575
410	Licofuranone	229.095	357.131	POS	0.13248	0.222315	0.136872	0.127288	0.154444	0.128868	0.148974	0.131682	0.161816	0.138396	0.116145	0.136621
411	Oxyresveratrol 2-O-β-D-glucopyranoside	101.008	451.126	NEG	0.254753	0.720543	0.255688	0.254736	0.228075	0.349739	0.327081	0.396332	0.400051	0.826902	0.366244	0.633352
412	Vanillin acetate	95.0206	195.064	POS	0.0651169	0.0579565	0.0535581	0.0576304	0.0562704	0.0500034	0.0502392	0.0471617	0.0522042	0.0462536	0.047207	0.0463779
413	KRN-633	148.85	415.115	NEG	0.0890955	0.307452	0.224469	0.182706	0.189029	0.118045	0.0662615	0.144295	0.272039	0.121537	0.204499	0.0940187
414	Lactobionic acid	26.7252	357.105	NEG	0.491399	0.665967	0.598935	0.591308	0.670218	0.429782	0.394663	0.393401	0.462387	0.395358	0.344927	0.347175
415	3-(3,4,5-Trimethoxyphenyl)propanoic acid	142.124	241.105	POS	0.296673	0.569811	0.13984	0.613372	0.362419	0.32652	0.21684	0.201865	0.399696	0.134724	0.191967	0.198769
417	1,4,5-Naphthalenetriol	154.498	177.053	POS	0.0716034	0.0937019	0.0731462	0.0753696	0.0924209	0.0756409	0.0613345	0.0616387	0.0645989	0.0651199	0.0580729	0.0631686
418	Methyl cinnamate	160.563	163.074	POS	0.274146	0.373867	0.27475	0.337855	0.354457	0.308885	0.272128	0.231133	0.262197	0.288409	0.231387	0.218513
419	MethylIndole-3-acetate	192.108	190.085	POS	0.0152951	0.019657	0.02519	0.0167994	0.0230072	0.0337611	0.0207269	0.0224084	0.0253133	0.0047012	0.0236352	0.00871398
420	7-Ketocholesterol	352.841	399.329	NEG	0.271692	0.237097	0.219045	0.379799	0.24962	0.179267	0.38387	0.388484	0.275501	0.412007	0.386532	0.482877
421	Tiliroside	236.727	593.132	NEG	0.0370068	0.0257063	0.0423647	0.0235181	0.017015	0.0326549	0.0267286	0.0292927	0.0580529	0.0244592	0.011228	0.0207933
423	Stigmasterol	318.641	395.364	POS	0.190151	0.116743	0.116163	0.192073	0.136903	0.174776	0.0990677	0.0953148	0.145984	0.0969569	0.112289	0.097786
424	(R)-(E)-4,7-Megastigmadien-9-one	232.855	193.157	POS	0.0411321	0.0435627	0.0437988	0.0433059	0.0391085	0.0412914	0.0611851	0.0836474	0.0485627	0.0716014	0.0752634	0.0695613
425	PA(18:3(9Z,12Z,15Z)/20:5(5Z,8Z,11Z,14Z,17Z))	309.064	717.456	POS	0.169593	0.0943777	0.0928113	0.0917943	0.10882	0.126573	0.119997	0.0988919	0.190847	0.0895005	0.0818954	0.106184
426	Uridine diphosphate-N-acetylglucosamine	36.3872	606.078	NEG	2.33172	2.15904	2.5598	2.14954	3.11166	1.74475	3.03097	3.14381	2.71253	2.39009	3.12412	3.96551
427	Cimifugin	86.5223	305.105	NEG	0.112344	0.0830331	0.0831934	0.114626	0.0120675	0.0683346	0.0925636	0.0777054	0.00940864	0.0638815	0.103263	0.0865562
429	Benzofuran	174.625	119.048	POS	0.0706244	0.0878123	0.0675831	0.0837667	0.0960295	0.0752765	0.0800317	0.0715373	0.0758927	0.0749037	0.0621529	0.0740496
430	2-Methylpiperidine	355.571	100.112	POS	0.0491462	0.0346868	0.0421118	0.0490674	0.0423928	0.0446524	0.0473908	0.0465874	0.0316947	0.0413131	0.0431431	0.0421479
431	Kaempferide	216.487	301.069	POS	0.0784503	0.0729134	0.0393211	0.0434563	0.0864417	0.0660691	0.0715771	0.0870344	0.0822192	0.0810681	0.0976849	0.0950884
432	Adipic acid	90.649	145.052	NEG	0.128236	0.115487	0.109729	0.131283	0.133044	0.100326	0.0861914	0.0909712	0.114298	0.119601	0.0920961	0.104218
433	Nootkatone	266.818	219.173	POS	0.0506996	0.0535164	0.0495054	0.0667053	0.0672017	0.0624789	0.0434916	0.0380416	0.0424617	0.0369705	0.0371611	0.0406962
434	Glucovanillin	135.461	373.116	NEG	0.173772	0.254035	0.164066	0.21144	0.219189	0.152835	0.143846	0.0967035	0.181979	0.138422	0.128127	0.11558
435	Vincetoxicoside B	191.261	447.096	NEG	15.0485	36.7936	14.2532	17.1456	15.2831	20.4313	27.0826	19.8569	18.9382	26.9545	26.247	17.8743
436	Tyrosyl-Aspartate	225.834	297.11	POS	0.0635438	0.0705116	0.0428646	0.0522919	0.0740075	0.0334671	0.0290675	0.040601	0.0416104	0.0419381	0.0300847	0.0493069
437	Rosarin	184.646	427.163	NEG	0.295236	0.510792	0.227547	0.47982	0.261939	0.361698	0.18941	0.142547	0.205295	0.0427818	0.183805	0.205129
438	Lucidal	292.663	455.348	POS	0.25407	0.284097	0.235528	0.2997	0.273643	0.361105	0.288277	0.263084	0.522703	0.326041	0.349471	0.337282
439	Sclareolide	232.409	251.198	POS	0.150488	0.105628	0.117644	0.204868	0.0541809	0.0935532	0.129716	0.138729	0.0913834	0.118962	0.132229	0.141163
440	3-Hydroxymethylglutaric acid	42.4676	161.046	NEG	0.474968	0.842727	0.785414	0.517422	0.490139	0.586875	0.59776	0.488255	0.588888	0.552975	0.479455	0.550214
441	Aristolone	304.759	219.173	POS	0.0572095	0.0550877	0.0598237	0.0472169	0.046935	0.0615962	0.0555673	0.0625955	0.0614226	0.0667896	0.0651536	0.064547
442	Procurcumenol	235.061	217.157	POS	0.0316964	0.0200802	0.0301599	0.0349993	0.114026	0.0255824	0.0461079	0.0283415	0.0261059	0.0250133	0.0385646	0.0285418
443	3-Methyl-1-butylamine	354.895	88.1114	POS	33.9505	28.5893	30.6579	30.109	31.422	30.174	29.4249	30.2771	29.3902	28.9503	30.2486	29.9169
444	7-Hydroxyenterolactone	177.264	315.121	POS	0.154543	0.169596	0.242456	0.161774	0.200231	0.149937	0.150041	0.135591	0.16054	0.162187	0.159058	0.148338
445	PS(18:2/18:2)	351.01	782.503	NEG	0.1721	0.187493	0.223014	0.14015	0.0326425	0.168641	0.170713	0.167261	0.195841	0.207614	0.224959	0.197364
446	1-Nitronaphthalene-5,6-oxide	182.795	190.049	POS	0.100605	0.086559	0.105441	0.0925921	0.0908456	0.110291	0.105413	0.131294	0.107282	0.114628	0.11438	0.117436
447	Pyridine	147.675	80.0488	POS	0.17856	0.228646	0.222109	0.191479	0.186376	0.201075	0.220878	0.258688	0.258059	0.232936	0.176822	0.16814
448	5-Hydroxyindoleacetate	167.38	192.064	POS	0.0631952	0.0487671	0.0512321	0.0538424	0.0425588	0.0487244	0.0656443	0.0584452	0.0514087	0.0671656	0.0480065	0.0506073
449	Ethyl (Â±)-2-ethyl-3-phenylpropanoate	148.118	207.139	POS	0.025174	0.0244193	0.0260069	0.0265533	0.0251878	0.0274597	0.0263316	0.0260927	0.0261428	0.0262085	0.0278868	0.0265957
450	PE(18:1/18:2)	341.802	740.528	NEG	6.15359e-05	0.0590875	0.0629788	0.0715487	0.0538767	0.0764892	0.0668374	0.0907326	0.0408634	0.0819791	0.0839354	0.0504553
451	5,7-dihydroxy-6-methoxy-2-phenyl-4H-chromen-4-one	212.42	283.063	NEG	0.444941	0.204082	0.359087	0.28151	0.328275	0.14812	0.28038	0.296572	0.263727	0.308471	0.2588	0.348284
453	Danshenxinkun A	202.46	295.099	NEG	1.83443	1.96854	0.988393	1.78316	4.30004	1.8603	0.174683	1.152	1.87742	0.164317	1.59272	1.65129
454	Eupatilin	197.862	345.095	POS	0.353699	1.19087	0.498349	0.207687	0.416588	0.357804	0.3216	0.422937	0.45871	0.397104	0.667344	0.566209
455	Stearoylethanolamide	318.383	328.319	POS	0.0115974	0.0124419	0.00854588	0.0092905	0.0118735	0.00936867	0.00953622	0.00925511	0.0108253	0.00791045	0.00893788	0.00873123
456	Anemosapogenin	319.877	517.355	NEG	0.216834	0.167878	0.227836	0.337994	0.381859	0.308051	0.213114	0.16544	0.176674	0.167317	0.134347	0.194538
457	Diferuloylputrescine	195.157	441.199	POS	0.299929	0.401786	1.06654	1.31257	1.03063	0.307703	0.230877	0.285005	0.26322	0.139786	0.177581	0.212285
459	(2-Naphthalenyloxy)acetic acid	55.8837	203.069	POS	0.0611201	0.0651225	0.0547762	0.046973	0.0718697	0.0542377	0.0577509	0.0507312	0.0388781	0.0514305	0.0562708	0.0631618
460	3-(Isothiocyanatomethyl)-1-methoxy-1H-indole	151.427	219.064	POS	0.0729764	0.0642271	0.0608482	0.0550839	0.0707744	0.0406131	0.0536711	0.0545596	0.0500143	0.0550104	0.0720376	0.0941491
461	Ethenyl acetate	23.7488	87.0433	POS	0.131832	0.105184	0.159513	0.136544	0.160511	0.123404	0.156584	0.137151	0.156913	0.163734	0.159221	0.187953
462	Xanthurenic acid	191.964	204.031	NEG	1.19018	1.09056	1.22173	1.10041	0.903086	1.12728	1.12686	1.42988	1.28275	1.17852	1.23337	1.30989
463	Pomolic acid	333.784	471.349	NEG	29.1243	31.3567	35.1543	32.5225	30.5917	29.1462	53.3273	48.7022	34.1769	43.8995	26.1411	40.9065
465	PC(18:3e/22:6)	318.852	814.551	POS	0.0140338	0.0123612	0.0312958	0.0116128	0.0210301	0.019097	0.0241613	0.0205876	0.01849	0.00845897	0.0085146	0.0116955
466	Cer/NS(d18:2/16:0)	352.451	594.513	NEG	0.000648114	0.34313	0.31316	0.312853	0.243616	0.223682	0.308496	0.203937	0.282498	0.313588	0.292035	0.242845
467	Polyporusterone B	288.369	477.315	POS	0.419363	0.372832	0.390607	0.389374	0.373066	0.376702	0.42318	0.401302	0.58508	0.413105	0.382071	0.333748
468	2-Methylerythritol	236.379	129.093	NEG	0.287994	0.263754	0.296215	0.30642	0.258355	0.295369	0.188506	0.260409	0.199968	0.209498	0.31548	0.257293
469	Deoxyelephantopin	84.2281	345.131	POS	0.234262	0.206237	0.162761	0.1645	0.321709	0.227102	0.259073	0.19149	0.16909	0.233481	0.251756	0.231338
470	Palmitoleoyl Ethanolamide	244.333	298.272	POS	0.732466	0.726221	0.885373	0.642524	0.626626	0.979065	0.704414	0.685011	0.563511	0.837182	0.62222	0.708167
471	PEtOH(27:0/18:2)	311.928	853.68	NEG	0.0240924	0.0587797	0.0725488	0.0604461	0.0521384	0.0519096	0.050948	0.0551387	0.0567176	0.0565313	0.0253322	0.0555713
472	Isopropyl 3-(3,4-dihydroxyphenyl)-2-hydroxypropanoate	125.303	241.105	POS	0.0711107	0.136122	0.0323074	0.138924	0.0818602	0.0809295	0.0511598	0.0469189	0.0913116	0.0251917	0.0429153	0.0506202
473	PC(16:2e/19:2)	342.845	754.578	POS	1.51574e-05	0.00378762	0.00596291	0.00481136	0.00260141	0.00125026	0.00338449	0.0028351	0.00152866	0.00742811	0.00351458	0.00141193
474	3-O-p-Coumaroylquinic acid	164.457	337.094	NEG	1.41474	1.89689	1.5454	1.32371	2.34026	1.10221	1.69243	1.47731	1.57904	1.51681	1.58499	1.96907
475	Sterol	277.403	249.219	POS	0.0343635	0.0308306	0.0241418	0.0454179	0.0524628	0.0362905	0.0156054	0.0171268	0.0228761	0.0166	0.0154525	0.0205786
476	Dodecanoic acid	290.714	199.171	NEG	5.28059	5.97183	5.97124	5.53863	5.77515	5.5456	5.49869	5.90579	6.74292	5.44951	4.44952	4.87257
477	PC(22:1(13Z)/14:1(9Z))	320.372	786.591	POS	0.00281868	0.0237968	0.0244223	0.0192007	0.0022137	0.018396	0.0120332	0.0372286	0.0521827	0.0432586	0.00975978	0.032787
478	Cibulins	313.67	93.036	POS	0.0343832	0.0339827	0.036643	0.0359576	0.0322105	0.0333566	0.0296732	0.0342384	0.0345831	0.0322364	0.0391414	0.0247805
479	1-deoxy-1-(N6-lysino)-D-fructose	26.2368	132.031	NEG	0.420379	0.392822	0.875483	0.658671	0.703951	0.354754	0.493368	0.519274	0.431314	0.3611	0.229327	0.485938
480	Linoelaidic acid	311.268	279.234	NEG	77.7061	92.8953	79.9604	86.1224	94.4569	84.5309	74.1376	78.5466	78.939	88.7627	68.8218	83.1946
481	DL-Buthionine-(S,R)-sulfoximine	56.5605	205.105	POS	0.015213	0.0155817	0.0125763	0.0165878	0.0109907	0.0179946	0.016862	0.0296197	0.0229846	0.0122195	0.0124405	0.0108019
482	PC(14:1e/4:0)	289.65	522.349	POS	0.166827	0.128787	0.155866	0.0392041	0.149052	0.15077	0.16591	0.0599652	0.227415	0.204286	0.158582	0.106676
483	Indoleacetaldehyde	155.079	158.062	NEG	0.119709	0.145599	0.146522	0.110616	0.113734	0.301314	0.129899	0.165446	0.13873	0.0909911	0.132271	0.128862
484	Protosappanin A	187.307	271.062	NEG	1.91525	3.1086	1.59228	3.05169	2.48657	1.14739	2.22164	1.41677	1.55552	0.814267	1.37936	1.74362
485	Methyl 3-(2,3-dihydroxy-3-methylbutyl)-4-hydroxybenzoate	46.885	255.121	POS	0.0102037	0.0119355	0.0112278	0.00824724	0.0051039	0.0100843	0.00784151	0.00984669	0.00739878	0.0103666	0.00943286	0.0090822
486	Acetoacetic acid	25.6858	85.0277	POS	0.144664	0.168987	0.21229	0.180135	0.162923	0.12982	0.1323	0.130576	0.144575	0.12713	0.122551	0.133668
488	(10E,12Z)-(9S)-9-Hydroperoxyoctadeca-10,12-dienoic acid	258.789	311.225	NEG	61.3477	51.383	43.702	54.2689	113.252	58.0298	28.7983	24.9867	37.3479	28.7204	27.7595	28.7229
489	3-Methylcyclopentene	14.1806	83.0849	POS	0.058439	0.0584005	0.0577256	0.0803761	0.066673	0.0638884	0.0584032	0.0490483	0.093359	0.0778747	0.0870523	0.0572829
490	Vulgaxanthin II	221.785	341.099	POS	0.0200706	0.020145	0.022236	0.015177	0.0362729	0.0151884	0.0431352	0.0478997	0.0313111	0.030963	0.0391204	0.0464719
491	Episyringaresinol 4'-O-β-D-glncopyranoside	174.587	598.245	POS	0.0491194	0.124872	0.083911	0.0486348	0.112651	0.0821986	0.0289311	0.0521067	0.0538587	0.05025	0.0411641	0.0627176
492	2'-Hydroxyacetophenone	146.18	137.059	POS	0.763858	0.615868	0.56414	0.551525	0.59355	0.588701	0.52584	0.501253	0.523051	0.725689	0.652222	0.506469
493	Rupestonic acid	221.338	249.147	POS	0.0151942	0.0112357	0.0111727	0.0133955	0.0173496	0.0151709	0.00403005	0.00745581	0.0128278	0.0103215	0.00798851	0.00830812
494	trans-Ferulic acid	160.868	193.052	NEG	0.911257	1.05999	0.922231	0.871452	0.995779	0.899179	1.03389	0.922392	1.09637	0.989226	0.892033	0.981535
495	D-Sphingosine	252.924	282.277	POS	0.0604774	0.0794503	0.0812343	0.0690783	0.0722692	0.0736351	0.0760135	0.085827	0.0814361	0.0932048	0.0641254	0.0741608
496	Glycyl-L-tyrosine	28.7863	221.091	POS	0.233742	0.335108	0.244303	0.369456	0.320584	0.265422	0.19367	0.164412	0.195173	0.210281	0.145549	0.152478
497	5-(3',4',5'-Trihydroxyphenyl)-gamma-valerolactone	141.379	225.074	POS	0.0400228	0.0583303	0.0414581	0.0429816	0.0596594	0.0387287	0.0309136	0.032036	0.0383342	0.0340904	0.0302764	0.031428
498	2,3-Di-O-methylellagic acid	198.439	331.042	POS	0.0418119	0.186558	0.0931758	0.0500359	0.045126	0.0712205	0.108652	0.129456	0.137031	0.120454	0.182246	0.13478
499	9-OxoODE	298.024	293.214	NEG	1.42158	1.40458	1.18153	1.57998	1.70905	1.46284	1.09705	1.12073	1.30581	1.10137	1.11067	1.10264
500	Ureidopropionic acid	162.596	133.064	POS	0.104557	0.107895	0.0878169	0.0986648	0.135455	0.0998434	0.0893611	0.0843031	0.0863617	0.086036	0.0787865	0.0826732
501	PS(16:0/18:2)	348.766	758.5	NEG	0.599708	0.715639	0.615734	0.106163	0.468884	0.624191	0.52883	0.510059	0.102641	0.446986	0.536926	0.5706
502	Xanthoxylin	177.382	195.067	NEG	13.1278	14.7342	13.6666	14.8171	17.0933	13.9905	15.1825	12.724	14.3243	13.3972	13.9238	13.2328
503	D-Biotin	153.884	227.089	POS	0.211665	0.384478	0.253069	0.317555	0.276492	0.539152	0.228452	0.134971	0.211373	0.141952	0.187855	0.159358
504	Hesperetin	178.688	301.073	NEG	1.34531	5.56368	2.30807	2.42675	4.06969	1.6603	2.18459	2.58304	1.38411	1.67531	1.88234	4.28014
505	2-Methoxycinnamic acid	214.464	161.059	POS	0.043325	0.0436317	0.0439644	0.0452026	0.054045	0.0422561	0.0439347	0.0467588	0.0438856	0.0393462	0.0381311	0.0436684
506	Oxidihydroartocarpesin	196.012	371.11	POS	0.10458	0.0428255	0.0452976	0.0574034	0.223893	0.0938907	0.0946961	0.293022	0.199592	0.0850408	0.124237	0.269124
507	β-Damascenone	204.426	191.141	POS	0.0679488	0.075799	0.090647	0.0613322	0.0571345	0.0757382	0.0746735	0.0770403	0.0856696	0.0815698	0.0878288	0.0713091
508	Coriandrone E	156.562	249.074	POS	0.0897152	0.0930414	0.0803188	0.0892037	0.0831662	0.0789597	0.0924968	0.0757891	0.0777184	0.077813	0.0857325	0.0844865
509	Androsin	50.7876	387.131	NEG	0.0819369	0.060137	0.0298498	0.085357	0.0969886	0.0478858	0.021024	0.0167007	0.0195274	0.0256438	0.0169867	0.037096
510	N-(gamma-Glutamyl)ethanolamine	25.5124	191.102	POS	0.463014	0.263549	0.384605	0.360122	0.492152	0.324561	0.31709	0.345641	0.29464	0.346069	0.341151	0.396604
511	3-(3,4-Dihydroxybenzyl)-7-hydroxy-5-methoxy-4-chromanone	167.242	317.099	POS	0.114131	0.137699	0.106977	0.144323	0.205842	0.101932	0.121081	0.13186	0.104374	0.104477	0.104459	0.132149
512	gamma-Glutamylmethionine	44.5174	277.085	NEG	3.27769	5.45622	4.80648	2.23184	2.68021	3.35457	2.06355	2.29294	3.21656	2.09217	1.60135	1.70282
513	N-Methylsalsolinol	359.726	194.116	POS	0.0341239	0.0311715	0.0304349	0.0301765	0.0314412	0.026482	0.0298803	0.0235452	0.0308567	0.0196902	0.0289457	0.0223396
514	N-Phenylacetylaspartic acid	166.32	252.085	POS	0.0707668	0.098956	0.0646269	0.0984819	0.116554	0.0537152	0.0771188	0.0635141	0.124811	0.0943927	0.0725758	0.0658382
515	3a,7a-Dihydroxy-5b-cholestanoyl-CoA	37.807	201.038	POS	0.0129435	0.0155658	0.0187669	0.00887005	0.00780298	0.00907806	0.0130913	0.00754865	0.0109258	0.0114874	0.00783142	0.0075072
516	2'-Hydroxy-3,4',5',7,8-pentamethoxyflavone	169.189	389.121	POS	0.113876	0.0903598	0.11065	0.100743	0.075581	0.0939524	0.130564	0.159151	0.114161	0.204007	0.149786	0.144807
517	3-Carboxy-4-methyl-5-propyl-2-furanpropionic acid	165.94	239.093	NEG	0.242955	0.202371	0.372262	0.257711	0.449904	0.20617	0.180443	0.178651	0.186963	0.194296	0.230423	0.214568
518	(E)-6-Methyl-6-(5-methyl-2-furanyl)-3-hepten-2-one	209.138	207.136	POS	0.0353111	0.0369808	0.0342746	0.0350135	0.0392371	0.0321813	0.0282441	0.033034	0.0413963	0.047493	0.030243	0.0349435
519	Palmitic acid	320.571	255.234	NEG	89.2014	85.0428	75.6326	82.605	98.4468	77.6514	62.8688	66.7357	66.9344	61.1861	63.1264	60.8636
520	N-Acetyl-L-methionine	167.656	190.052	NEG	1.17584	1.12771	1.1659	1.39667	0.909505	1.1435	1.11104	1.17318	1.12805	1.15062	1.13114	1.18958
521	Stearidonic acid	276.721	277.214	POS	2.04838	1.7997	1.656	2.48447	3.21288	2.24202	1.20268	1.14453	1.42529	1.23171	1.1531	1.29473
522	Tenuifolin	308.219	698.41	POS	0.0274861	0.0262533	0.0298232	0.0172009	0.0233813	0.0247938	0.03214	0.0227869	0.0497556	0.0280906	0.0168579	0.0246814
523	Maltose monohydrate	25.2657	360.147	POS	0.143904	0.1043	0.138647	0.125577	0.151689	0.120729	0.0937367	0.125522	0.110385	0.103492	0.0996839	0.121607
524	PI(16:0/18:2)	334.509	833.519	NEG	0.250766	0.375885	0.380776	0.626459	0.658268	0.354566	0.442174	0.417144	0.265465	0.2506	0.244006	0.425814
526	Ethyl hexadecanoate	333.849	283.266	NEG	26.1556	22.3929	15.9037	17.4961	22.3337	15.9243	15.8052	16.2091	19.6451	14.1622	16.8418	15.3741
528	Uridine 5'-monophosphate	64.2087	323.033	NEG	0.0211347	0.093531	0.0721643	0.161975	0.0777162	0.0723812	0.0777756	0.0607952	0.0507051	0.0599443	0.0384417	0.0334401
529	Beta-Carboline	154.498	169.075	POS	2.1458	1.90343	1.35981	2.16281	1.4872	1.90433	1.87355	1.44254	1.78726	1.48773	1.6564	1.92327
530	2'-Hydroxy-3',4',5',7,8-pentamethoxyflavan	187.885	377.158	POS	0.522256	0.851273	0.613168	0.698236	0.635436	0.757552	0.589338	0.597423	0.752925	0.584262	0.548155	0.480193
531	LPI(16:0)	351.511	571.293	NEG	0.0517859	0.0905904	0.0460322	0.0866355	0.0730455	0.0704816	0.0752142	0.0512496	0.06897	0.0780362	0.0635847	0.0515519
532	DZ2002	25.3791	252.106	POS	0.00989842	0.0188067	0.0172797	0.0152062	0.0214728	0.0113504	0.0169231	0.0132656	0.0114653	0.0101764	0.00822368	0.0127911
533	Coixinden B	174.601	235.094	POS	0.145286	0.23696	0.160535	0.160457	0.210061	0.202147	0.161603	0.182419	0.173757	0.160334	0.191601	0.141909
534	7beta-Hydroxylathyrol	227.794	351.213	POS	0.0903958	0.073244	0.0709144	0.0931503	0.106213	0.0879666	0.0575846	0.0535125	0.0655159	0.0663845	0.0608814	0.0573627
535	Caffeine	359.046	195.084	POS	0.0158966	0.0147953	0.0151523	0.0155925	0.0152581	0.015636	0.012972	0.0164352	0.0141484	0.0139938	0.0161559	0.0161882
536	3-Methyloxindole	168.125	146.062	NEG	0.384153	0.435015	0.477561	0.460111	0.333388	0.459075	0.423738	0.486677	0.453407	0.429142	0.427563	0.455978
537	Oxazepam	221.176	287.053	POS	0.096993	0.186608	0.0948451	0.0823075	0.129772	0.0762121	0.105286	0.102433	0.098101	0.0911806	0.0952754	0.12239
538	LPI(18:2)	329.133	595.293	NEG	0.101999	0.0520441	0.152067	0.0778628	0.122486	0.0788219	0.163213	0.154306	0.12544	0.169143	0.204283	0.274104
540	3,4',5-Biphenyltriol	137.195	203.069	POS	0.063912	0.0755256	0.0614275	0.0611433	0.0779596	0.062979	0.0608405	0.0457575	0.0579157	0.0595892	0.059028	0.0587863
541	DL-m-Tyrosine	27.7387	182.08	POS	0.0616689	0.053131	0.0677079	0.0668913	0.102261	0.0529042	0.0572639	0.0499251	0.0533244	0.0406874	0.051019	0.0542244
542	Brassicasterol	328.967	381.348	POS	0.0353111	0.0335658	0.0335223	0.0445107	0.0485174	0.0348434	0.0341138	0.0325729	0.0398904	0.0296465	0.0408464	0.0362166
543	Propylgallate	95.2237	211.062	NEG	4.7126	4.55469	3.8143	4.70388	4.27946	3.59213	3.52409	3.05775	3.67859	3.32089	3.15936	3.0345
544	Myristicin	114.286	193.084	POS	0.216606	0.223482	0.0862258	0.493721	0.139324	0.176686	0.183131	0.118206	0.195531	0.0903105	0.114727	0.106728
545	Phenylalanyl-Aspartate	190.802	281.115	POS	0.0781021	0.0854451	0.0699981	0.0692003	0.0905698	0.0695925	0.0705491	0.0766353	0.076052	0.0821939	0.0675732	0.071408
546	NS-398	263.563	313.08	NEG	0.162582	0.196899	0.034292	0.14049	0.142471	0.0962299	0.13458	0.194231	0.20328	0.143759	0.138868	0.0915287
547	2,3-Dihydroxy-4-methoxyacetophenone	94.4769	181.051	NEG	2.52546	2.74898	2.16579	2.67104	2.23654	2.16805	2.04635	1.76337	2.16172	2.00417	1.9778	1.78408
548	Astragenol	288.572	473.362	POS	1.57081	1.40885	1.4663	1.45231	1.22294	1.47951	1.55975	1.51146	2.35539	1.57145	1.47781	1.21347
549	6-Hydroxyluteolin 7-glucoside	184.646	463.09	NEG	2.99091	16.1023	5.28292	3.17167	4.74223	5.22515	5.53172	6.04576	6.57593	6.21564	8.38766	6.58396
550	(+)-Isolariciresinol	190.579	359.152	NEG	3.84835	5.82577	5.33783	5.55688	4.4218	5.50242	6.26548	5.95756	6.67747	6.96168	6.50724	4.9312
551	4-Aminobutyric Acid	24.8601	102.056	NEG	0.430281	0.297267	0.444111	0.448667	0.571637	0.397538	0.567065	0.525799	0.454339	0.414721	0.529942	0.582848
552	Moracin B	181.893	287.089	POS	0.143248	0.235652	0.251042	0.198576	0.23345	0.133845	0.116697	0.168697	0.118638	0.175526	0.100597	0.13947
553	Caryophyllene alpha-oxide	297.863	207.173	POS	0.0148314	0.0206305	0.0152526	0.0220425	0.0230561	0.0179228	0.023858	0.0184659	0.0149939	0.0179988	0.0145631	0.0260051
554	Campesterol	271.447	383.36	POS	0.00861381	0.0173336	0.00563974	0.00703053	0.0119385	0.00923436	0.023875	0.0190288	0.0107502	0.0179158	0.0131571	0.0184248
555	Carboprost (tromethamine)	265.507	351.251	POS	0.130352	0.0965731	0.116793	0.19009	0.297452	0.160652	0.0604669	0.0668197	0.0809874	0.109823	0.0677606	0.0728859
556	alpha-Amyrone	328.992	425.376	POS	0.0293097	0.0296517	0.029366	0.0504461	0.0501842	0.0340195	0.0273392	0.028349	0.0336342	0.0371889	0.031518	0.0347244
560	Naringenin	53.0879	271.06	NEG	0.37126	0.500241	0.45758	0.449809	0.438024	0.284711	0.420534	0.531961	0.780065	0.483724	0.345536	0.334573
561	1,3-Dimethyluric acid	217.803	197.069	POS	0.0356402	0.0372252	0.0242559	0.0389251	0.0306251	0.0295295	0.0202147	0.0192025	0.0225257	0.021067	0.0184394	0.0187641
562	Baimaside	153.086	627.153	POS	0.00665659	0.0432115	0.00718749	0.00388242	0.016188	0.0143966	0.00446176	0.0106847	0.019817	0.00741065	0.0133831	0.0189161
563	Xanthoxylol	163.143	357.132	POS	0.864542	1.10368	0.79224	0.856163	1.31649	0.671645	0.916769	0.619843	0.694499	0.854422	0.685381	0.631145
564	Methuyl tanshinonate	197.382	339.12	POS	1.78264	2.24869	2.03737	1.99322	1.92788	2.13549	2.33743	1.99937	2.14563	2.07189	2.25542	2.06396
565	Epoxyanethole	285.433	165.09	POS	0.469008	0.452411	0.439428	0.438053	0.401266	0.43104	0.531465	0.466109	0.699339	0.463106	0.428788	0.343081
566	N-Acetyl-L-tyrosine	168.699	206.079	POS	0.275071	0.380492	0.361931	0.229982	0.354626	0.393168	0.38077	0.342827	0.514281	0.302078	0.306149	0.291185
567	Agnuside	156.768	465.143	NEG	0.477258	0.953286	0.682391	0.635716	0.627306	0.640157	0.575872	0.479761	0.909145	0.763697	0.454236	0.464754
568	beta-Lapachone	199.009	225.089	POS	0.0315479	0.0595534	0.0333859	0.0503354	0.0855822	0.0391679	0.0404721	0.0422407	0.0462457	0.0197053	0.0403399	0.0517915
569	Calycosin	240.037	285.073	POS	0.00218499	0.00505946	0.00330001	0.0014341	0.00361811	0.00191997	0.00544972	0.00381664	0.00583165	0.00204043	0.00225801	0.00407141
570	Arbutin	42.4913	271.083	NEG	0.347831	0.50977	0.373737	0.40107	0.339846	0.368932	0.360424	0.335509	0.370318	0.4042	0.339199	0.35324
571	3-Nonanone	15.3855	143.142	POS	0.023827	0.0242071	0.0244905	0.015858	0.0249202	0.0248043	0.0230899	0.0226024	0.0155781	0.0232798	0.0235879	0.0251682
572	Perillyl acetate	258.247	195.137	POS	0.156531	0.149666	0.104103	0.162872	0.194128	0.158851	0.0818222	0.0745541	0.102016	0.0832727	0.0823709	0.0837459
573	N6-Acetyl-L-lysine	163.28	189.126	POS	0.0437656	0.102625	0.108191	0.0612698	0.0694689	0.0776655	0.0568873	0.0633261	0.0545017	0.0919973	0.0534297	0.0631629
574	PA(21:0/12:0)	335.499	663.478	POS	0.000606705	0.00116924	0.000948259	0.00106009	0.0018306	0.00114801	0.00141478	0.0020482	0.00139635	0.00395816	0.00202562	0.00335717
575	Lactiflorin	171.472	461.148	NEG	0.736496	0.943553	0.933354	0.942192	0.71144	0.775156	0.723239	0.707073	0.702368	0.682691	0.697045	0.984161
576	Lotusine	283.305	315.178	POS	0.187121	0.16794	0.169116	0.184561	0.153908	0.163549	0.186635	0.190105	0.282053	0.199731	0.155666	0.137363
577	Kifunensine	55.8824	233.079	POS	0.00387536	0.0148512	0.0107187	0.00824924	0.010901	0.0112744	0.0126288	0.0101098	0.0127985	0.00480374	0.00770741	0.00972179
578	Isoviolanthin	176.76	577.161	NEG	7.03342	11.7178	2.78313	6.05522	2.75784	3.32096	4.38259	5.43419	8.89223	2.32214	8.63743	5.32727
579	indolin-2-one	151.501	132.046	NEG	0.125058	0.113348	0.138217	0.139339	0.112973	0.118832	0.127844	0.123747	0.116702	0.116646	0.113428	0.142222
582	L-Isoleucine	27.7387	132.101	POS	0.0669455	0.052075	0.0744249	0.0861162	0.126167	0.0558366	0.0806523	0.0680892	0.0682982	0.0548308	0.0718787	0.0770261
584	phenethanolamine	41.7848	120.08	POS	0.0424484	0.0568791	0.0687997	0.0817966	0.096033	0.052307	0.0529167	0.0418292	0.0450121	0.0359002	0.0404802	0.050824
585	Alizarin	80.7251	239.034	NEG	6.15359e-05	0.0183272	0.0041898	6.55415e-05	6.59968e-05	6.20062e-05	0.021005	0.0913647	0.154167	0.0264695	0.0188699	0.004049
586	Tropone	143.664	107.048	POS	0.0857758	0.0878181	0.0702702	0.0764948	0.0911581	0.0708107	0.0504392	0.0654734	0.0644663	0.0631849	0.0502875	0.0740041
587	Gymnemagenin	274.763	489.357	POS	0.351179	0.322375	0.343268	0.327307	0.294161	0.309019	0.383012	0.382691	0.544564	0.387059	0.356146	0.31708
588	Megestrol	227.097	343.224	POS	0.0336375	0.065437	0.0336697	0.027224	0.0265935	0.0296901	0.0418118	0.0381972	0.0294904	0.0360431	0.043031	0.0433119
589	Aloesol	192.542	235.094	POS	0.151748	0.176677	0.155404	0.161229	0.180425	0.163925	0.150418	0.135668	0.171813	0.135063	0.146537	0.147072
590	β-Boswellic acid	304.62	455.356	NEG	6.90822	7.26192	6.96481	5.80965	6.29634	6.97557	7.26698	6.83202	7.04806	7.36733	6.47125	8.42653
591	Mevalonic acid	55.3733	147.067	NEG	0.408729	0.597872	0.516097	0.52247	0.523929	0.361928	0.483162	0.582945	0.82129	0.56528	0.399858	0.396005
592	4'-O-methyl-(-)-epicatechin-3'-O-beta-glucuronide	151.427	495.148	POS	0.237161	0.383315	0.216486	0.285403	0.217875	0.212391	0.0921191	0.099651	0.122921	0.0804421	0.0911285	0.097404
593	Isoeugenitin	55.8837	221.08	POS	0.0475614	0.0733087	0.063885	0.0452748	0.0668147	0.0551994	0.0652791	0.0612222	0.0668066	0.0585844	0.0658639	0.0630076
595	1-(3-Methoxy-4-hydroxy)-phenyl-6,7-dihydroxy-isochroman	159.326	289.105	POS	0.0123516	0.0127671	0.0104694	0.0141578	0.012455	0.0127576	0.0106448	0.0131576	0.0150598	0.0122894	0.0128926	0.0145178
596	Dehydroxyzyleuton	137.086	221.079	POS	0.0836936	0.100852	0.0795855	0.0902494	0.112777	0.0944566	0.0884837	0.067187	0.0895664	0.0799695	0.0792344	0.0749799
597	Acetylshengmanol Arabinoside	285.279	645.394	POS	0.547623	0.490919	0.529091	0.538267	0.454106	0.506128	0.562985	0.515923	0.793995	0.563494	0.516397	0.437539
598	LPA(18:0)	306.631	437.271	NEG	0.131253	0.184933	0.232012	0.163994	0.293947	0.312965	0.393709	0.345977	0.455611	0.244475	0.149183	0.169248
599	Glycolithocholic acid	240.364	434.317	POS	0.0662668	0.0665093	0.0678769	0.0655495	0.0659478	0.071124	0.0692475	0.0653661	0.0670773	0.0667411	0.073425	0.0657089
600	3-(3,4-Methylenedioxyphenyl)propenal	215.745	177.053	POS	0.0543723	0.0566237	0.0779392	0.0612408	0.0609393	0.054428	0.0484484	0.0671878	0.0509388	0.0446587	0.0424016	0.0487498
601	Lumacaftor	166.598	453.114	POS	0.0979669	0.27243	0.211775	0.130555	0.231034	0.111516	0.200406	0.138652	0.113292	0.102374	0.104245	0.141217
602	4-Nitrocatechol	179.404	154.015	NEG	0.382855	0.234095	0.201163	0.344041	0.240766	0.336419	0.37464	0.443472	0.312858	0.350323	0.469961	0.483469
603	beta-Glycyrrhetinic acid	300.626	471.345	POS	0.498169	0.504257	0.479748	0.492227	0.417248	0.47441	0.456729	0.470101	0.493436	0.622617	0.597913	0.527898
604	Paeoniflorin	145.292	463.156	POS	0.029328	0.0334885	0.0379989	0.0272109	0.0404788	0.0275702	0.0242593	0.0247711	0.0286872	0.0272768	0.0278149	0.0260869
605	Cytochalasin Opho	274.173	452.276	POS	0.141232	0.13206	0.137961	0.124644	0.115743	0.11983	0.137624	0.141846	0.247138	0.135017	0.12696	0.098243
606	3,3',4'5-Tetrahydroxystilbene	186.663	243.068	NEG	0.514284	0.619522	0.765389	0.46931	1.04084	0.328217	0.441935	0.55764	0.507525	0.437476	0.356628	0.515022
607	Pepstatin	346.555	668.445	POS	0.00932752	0.0110065	0.00398917	0.0137727	0.0103282	0.0112156	0.0123717	0.00912435	0.0132513	0.00665891	0.00971069	0.00709948
608	PA(18:1/18:2)	349.923	697.484	NEG	0.224009	0.231482	0.147476	0.118814	0.129132	0.124111	0.149877	0.15386	0.0524957	0.166163	0.0728056	0.191683
609	3',4',5,7,8-Pentamethoxyflavanone	84.0606	375.141	POS	0.0559858	0.0792193	0.0661737	0.0595928	0.056117	0.0731071	0.0662824	0.0553193	0.0672356	0.060224	0.061789	0.0580745
610	Oleoylethanolamide	311.073	308.293	POS	0.0341992	0.0376377	0.0268661	0.0289754	0.0401355	0.0327346	0.0491314	0.0350467	0.0263292	0.0246006	0.0245942	0.0447018
611	PC(17:2/22:6)	319.124	816.568	POS	0.0043791	0.00229699	0.00608111	0.00199623	0.00352902	0.00451192	0.00486061	0.00414997	0.00255911	0.00128825	0.00264332	0.00210058
614	β-​Apo-​8'-​carotenal	243.542	417.312	POS	0.0335146	0.0283747	0.0444689	0.0340981	0.0259849	0.031101	0.04546	0.0440019	0.0300817	0.0289598	0.045677	0.0466198
615	p-Aminobenzoic acid	197.855	136.041	NEG	0.223985	0.199422	0.269891	0.232045	0.25496	0.239607	0.257468	0.35292	0.262427	0.248703	0.23784	0.288753
616	2,3-Dehydrosilychristin	226.75	481.111	POS	0.0604759	0.11433	0.0933805	0.0648111	0.0817218	0.0705526	0.102609	0.0825034	0.0657125	0.0588491	0.0752162	0.103577
617	Ganoderal B	320.372	455.348	POS	0.264001	0.263789	0.269863	0.272019	0.27849	0.272235	0.253839	0.258777	0.270626	0.351319	0.284409	0.279244
618	alpha-Linolenic acid	301.988	277.218	NEG	27.9235	27.6201	33.0771	35.4751	35.3684	29.2084	28.3303	26.7649	25.8321	24.7004	25.4166	29.6306
619	Quinceoxepine	275.413	179.141	POS	0.193587	0.173142	0.163935	0.248348	0.312117	0.214691	0.113313	0.114393	0.134309	0.120822	0.114069	0.128853
620	Pollenitin	45.502	317.063	POS	0.0149448	0.0264262	0.0168106	0.0122825	0.0210456	0.0183162	0.012522	0.00976252	0.00627829	0.00807455	0.0125066	0.0148908
622	Methyl (2E,6Z)-dodecadienoate	233.106	211.168	POS	0.0112679	0.0146346	0.0151324	0.017378	0.0118625	0.0111311	0.029477	0.0422096	0.0176039	0.0325001	0.0365357	0.0288077
623	7Z,10Z-Hexadecadienoic acid	233.055	253.214	POS	0.0343325	0.0411197	0.0366815	0.0324686	0.0333312	0.0434721	0.033542	0.0312233	0.0323179	0.0273328	0.0355162	0.0386614
624	Baicalein	143.582	269.047	NEG	0.0970474	0.581904	0.166849	0.0851578	0.389699	0.0770591	0.209675	0.221836	0.258818	0.179443	0.23037	0.218451
625	Vaccarin	212.44	727.197	POS	0.0222549	0.0140014	0.0120783	0.0152768	0.00870069	0.0270203	0.0081901	0.00535009	0.0208655	0.0103396	0.0152724	0.00964247
626	6,10,14-Trimethyl-5,9,13-pentadecatrien-2-one	282.088	263.235	POS	0.0506303	0.0601796	0.0477813	0.0565888	0.0700406	0.0669013	0.0958042	0.0653415	0.0509868	0.0558688	0.047826	0.0827009
627	Clionasterol	344.872	397.38	POS	0.00836244	0.00978358	0.00553113	0.0100742	0.00976796	0.00809181	0.00546814	0.00625221	0.00877007	0.0108797	0.0055001	0.00589255
628	Thermophillin	143.451	169.048	POS	0.0681213	0.0954263	0.065209	0.0595269	0.0753922	0.0659571	0.0412292	0.0493486	0.0700734	0.0563717	0.0513277	0.0433279
629	N-Methyl-DL-aspartic acid	25.7397	148.059	POS	0.2819	0.261591	0.275382	0.296045	0.357597	0.240965	0.306598	0.297569	0.240413	0.211704	0.304227	0.276142
630	Tricetin	333.823	301.037	NEG	0.171729	0.379353	0.290172	0.227628	0.275988	0.220646	0.258913	0.266061	0.200837	0.267666	0.225598	0.311786
631	Alantolactone	220.456	233.152	POS	0.0575604	0.0520031	0.0497754	0.0629789	0.0732075	0.0554588	0.0543772	0.0381599	0.0470114	0.0414456	0.0516219	0.0487096
633	N2,N2-Dimethylguanosine	47.9482	312.127	POS	0.00288693	0.00552002	0.00440333	0.00427768	0.00363426	0.00374768	0.0028547	0.00262495	0.00303337	0.00282609	0.00230937	0.00254676
634	Dolichyl diphosphate	70.1581	345.131	POS	0.0979979	0.110606	0.0980258	0.0850615	0.122964	0.0978857	0.0967925	0.0894295	0.0948357	0.0940211	0.0888048	0.0807327
635	Solanolone	163.161	279.118	POS	0.0159411	0.0173696	0.0142947	0.0150231	0.0160371	0.0170947	0.013807	0.01602	0.0165823	0.0136537	0.0129977	0.0109516
636	p-Hydroxynonanophenone	250.983	235.168	POS	0.0532449	0.0452805	0.0428025	0.0567969	0.0615999	0.047759	0.0385429	0.0344923	0.0377437	0.0397339	0.0315645	0.0333402
637	(-)-Epigallocatechin	171.457	305.072	NEG	0.63389	0.823675	0.397636	0.870582	0.565558	0.713005	0.583915	0.423477	0.952211	0.324332	0.539119	0.651283
638	Calcitriol	301.241	399.323	POS	0.108088	0.0887126	0.0893039	0.0871049	0.092457	0.0982512	0.10537	0.0977207	0.0968556	0.194898	0.118161	0.103104
639	Galactose-beta-1,4-xylose	169.055	313.105	POS	0.116648	0.0793519	0.103991	0.0989434	0.138084	0.057936	0.105982	0.09761	0.0875621	0.0930193	0.0911142	0.116186
641	3-Hydroxyisovaleric acid	44.3488	117.056	NEG	0.316519	0.309631	0.273748	0.30231	0.255383	0.323993	0.304055	0.226843	0.396672	0.286019	0.256273	0.26533
642	3',5'-Dimethoxy-4'-hydroxyacetophenone	157.863	195.067	NEG	5.13379	5.29962	4.74117	5.06966	5.33107	4.88179	4.41552	3.84959	4.6668	4.14658	4.32128	3.82986
644	Artemisinin	166.665	265.141	POS	0.00735448	0.0146765	0.045155	0.0121818	0.0159727	0.012633	0.0150293	0.00993738	0.0141133	0.0131554	0.0110895	0.0111648
645	Phenylglyoxylic acid	173.833	149.025	NEG	0.201508	0.43864	0.211386	0.32767	0.345198	0.170743	0.174165	0.218991	0.311217	0.19824	0.312649	0.291046
646	1-(2,6,6-Trimethyl-2-cyclohexen-1-yl)-1,6-heptadien-3-one	232.423	233.188	POS	0.0215879	0.0178919	0.0217541	0.0274652	0.0228015	0.0177628	0.041159	0.0517199	0.0260142	0.0303187	0.0478066	0.0424582
647	Withanolide A	237.736	488.296	POS	0.0149712	0.0237406	0.0192668	0.0144634	0.0178695	0.0152551	0.032957	0.0244139	0.0179873	0.0211097	0.0262749	0.02691
648	Blumeatin	180.31	303.084	POS	0.10529	0.283221	0.238863	0.208004	0.227589	0.0896608	0.106182	0.145024	0.100807	0.0567246	0.105322	0.221715
650	8-iso-PGA1	262.928	335.225	NEG	0.496289	0.509069	0.531264	0.486795	0.558072	0.253807	0.226304	0.246831	0.45208	0.230307	0.243425	0.256728
651	Isoamyl 2-furonpropionate	236.418	211.131	POS	0.0417279	0.0254936	0.0310439	0.0387802	0.0481509	0.0340097	0.0146295	0.0131313	0.0232502	0.0155792	0.0543981	0.0162884
652	[10]-Paradol	275.421	335.255	POS	0.0190811	0.0228543	0.0206347	0.0153929	0.0341377	0.0140002	0.017759	0.00835604	0.0270426	0.0221233	0.0152069	0.0157815
653	2-Furoic acid	32.9466	111.009	NEG	1.00276	1.82607	2.55135	1.75274	2.21843	0.946523	1.18569	0.589099	1.25288	1.07668	1.19549	0.829883
654	Olivetol	231.086	179.108	NEG	0.216554	0.18934	0.161063	0.206079	0.251846	0.184601	0.120015	0.124239	0.149376	0.141319	0.136138	0.102007
655	Taxifolin 7-O-β-D-glucoside	176.759	465.105	NEG	0.687624	1.13563	0.996519	0.802742	0.728706	0.773365	0.520485	0.690499	0.518453	0.554854	0.711228	0.728567
656	Butin	141.252	273.073	POS	0.0336816	0.146528	0.0425647	0.0223987	0.0912198	0.0246071	0.0527756	0.0608788	0.0620802	0.0496924	0.0557952	0.0492753
657	Mevastatin	305.71	391.249	POS	0.834148	0.751363	0.622982	0.600859	0.573922	0.573044	0.689955	0.795241	1.13799	0.7214	0.598286	0.490909
658	Piperidine	311.753	86.0957	POS	0.0720317	0.0612188	0.120138	0.0575324	0.0782562	0.0662647	0.119904	0.0617991	0.143103	0.0866233	0.0581285	0.0675843
659	2,6-Dihydroxybenzoic acid	182.021	153.02	NEG	0.791738	1.40032	1.06108	0.873017	1.52087	1.2919	0.881145	1.01821	0.906378	0.994279	0.932409	1.02054
661	4-Methoxybenzyl acetate	142.064	181.084	POS	0.32899	0.355494	0.0957183	0.480808	0.243839	0.236696	0.287253	0.208792	0.318195	0.121961	0.142272	0.149837
662	6-(3-Hexenyl)tetrahydro-2H-pyran-2-one	184.574	183.137	POS	0.0411325	0.0331832	0.0424581	0.0324452	0.0391776	0.0209467	0.0552046	0.0606872	0.0520835	0.0741486	0.058099	0.0524603
665	2,4-Undecadienal	215.789	167.142	POS	0.0078478	0.0101077	0.00932932	0.00886175	0.010011	0.00905792	0.00878802	0.0091085	0.008175	0.00844016	0.00929553	0.00768474
666	3',4'-Dimethoxyflavone	197.184	283.095	POS	0.0423263	0.0976426	0.040657	0.0807957	0.077071	0.0460842	0.0575308	0.0387831	0.0558841	0.0547497	0.0426802	0.0380564
667	Lutein	316.265	568.424	POS	0.0333933	0.0196382	0.0455784	0.020741	0.041751	0.041751	0.0274885	0.0255248	0.017836	0.0147219	0.00957505	0.0348986
668	Ercalcitriol	309.843	411.322	POS	0.119345	0.0427863	0.0355224	0.0422969	0.0504195	0.0329193	0.045172	0.0150817	0.0465735	0.0376832	0.0401738	0.0611599
669	3-(1-Pyrrolidinyl)-2-butanone	297.86	142.121	POS	0.0411971	0.0456832	0.0391307	0.0299361	0.0458281	0.0446591	0.0574291	0.0452962	0.0316213	0.0398822	0.0359171	0.0506688
671	Quinic acid	26.3258	191.057	NEG	6.41464	13.034	7.78681	7.14108	6.18949	6.06025	5.04538	3.64148	6.50646	3.93645	3.58706	4.11012
672	Pyruvic acid	159.67	87.0092	NEG	0.68805	0.720909	0.928408	0.658286	1.51375	0.635715	0.666505	0.639091	1.07902	1.89821	0.644441	0.609118
673	Citropten	134.451	207.063	POS	0.0233126	0.0304964	0.0209821	0.0239778	0.0253729	0.0194527	0.017943	0.0167692	0.0217387	0.0201083	0.0156691	0.0457129
674	2,3-Dihydro-3,5-dihydroxy-2-oxo-3-indoleacetic acid 5-[glucosyl-(1->4)-b-D-glucoside]	24.6057	548.157	POS	0.0447268	0.0233994	0.052026	0.03337	0.043264	0.0258092	0.0276251	0.0396376	0.0356703	0.0239556	0.0299832	0.0403461
675	10-Deacetylbaccatin III	159.405	527.229	POS	0.0515243	0.0483406	0.0515076	0.0318585	0.0521397	0.0643187	0.0373216	0.0354537	0.0315379	0.0301914	0.0299572	0.0298021
676	Sweroside	151.521	357.121	NEG	0.546188	0.818598	0.504839	0.946526	0.519436	0.62045	0.46407	0.43528	0.592526	0.537185	0.485541	0.362135
678	alpha-Terpineol propanoate	310.209	211.168	POS	0.0363736	0.04458	0.0316526	0.0676279	0.0401796	0.0346689	0.0592391	0.110873	0.0264434	0.0487658	0.0315494	0.0586639
679	8-Hydroxypinoresinol	55.417	375.141	POS	0.000757344	0.0583002	0.0363233	0.0308175	0.0498811	0.0487128	0.0350202	0.0310755	0.0352604	0.036442	0.0310453	0.0298918
680	Tectorigenin 7-​O-​Xylosyl Glucoside	159.625	639.159	NEG	0.0579971	0.241395	0.0723192	0.0620094	0.159487	0.103873	0.0525087	0.0695219	0.0870678	0.0356032	0.0481959	0.108059
681	Nandrolone	249.68	275.198	POS	0.539774	0.454596	0.387357	0.653377	0.850934	0.526796	0.28531	0.237634	0.347733	0.25727	0.289958	0.282144
682	(7'R*,8'S*)-Methyl 4,7'-epoxy-3,8'-bilign-7-ene-4',9'-dihydroxy-3',5-dimethoxy-9-oate	181.266	387.141	POS	0.35146	0.663636	0.470396	0.414077	0.554925	0.464241	0.345891	0.384271	0.463055	0.467163	0.385138	0.412471
683	4-(Ethoxymethyl)-2-methoxyphenol	286.617	183.1	POS	0.167715	0.136768	0.136247	0.13055	0.116901	0.143853	0.161316	0.139536	0.209555	0.143558	0.142002	0.107597
684	TRPM8 agonist WS-3	307.779	212.199	POS	0.0635551	0.0640324	0.0503355	0.0528845	0.0705691	0.058711	0.0811282	0.0583521	0.0454791	0.0577682	0.0421995	0.0865368
685	Beta-Tyrosine	239.713	180.067	NEG	0.111563	0.076965	0.0518755	0.0456209	0.056051	0.11814	0.0639337	0.0473486	0.0433283	0.0834859	0.047144	0.0500577
686	5,6,7,8-Tetrahydroxy-3',4'-dimethoxyflavone	158.712	347.073	POS	0.0320738	0.11489	0.109315	0.0586498	0.0648843	0.0381658	0.0546178	0.0578107	0.0351454	0.0425445	0.016683	0.0484126
687	D-Xylulose	26.0562	149.046	NEG	0.955837	1.62141	1.11877	1.24993	0.959498	0.881896	0.739306	0.612387	0.905833	0.593941	0.574675	0.623709
688	JNJ-37822681 (dihydrochloride)	142.667	431.158	NEG	2.20264	3.71803	2.18042	3.11536	2.22581	2.14939	1.81434	1.57785	2.15148	2.34077	1.76893	1.62262
689	Palmitoylglycine	222.444	296.256	POS	0.0595907	0.0364566	0.0504133	0.045463	0.0483191	0.0507055	0.0392498	0.0372342	0.0361885	0.0375036	0.0363129	0.0442293
690	beta-Spathulene	297.87	203.178	POS	0.0176854	0.0192417	0.015223	0.0205516	0.0167957	0.022055	0.0217111	0.0217646	0.0163259	0.0246419	0.0160111	0.0254368
691	N-Malonyltryptophan	179.788	291.096	POS	0.135682	0.185638	0.155754	0.0586811	0.107962	0.117732	0.0560228	0.0983907	0.113049	0.0920076	0.0399234	0.0716112
692	13-OxoODE	271.851	293.214	NEG	56.4292	56.1228	14.211	22.6037	60.1402	18.1989	26.3817	26.4576	11.3558	27.1479	8.92348	37.0008
693	Ponicidin	195.341	380.204	POS	0.0144538	0.0219923	0.0125424	0.0150807	0.0182818	0.0150549	0.0236633	0.0182545	0.0195539	0.0186781	0.0212272	0.012429
694	2',8-Dihydroxy-3',4',5',7-tetramethoxyflavan	162.047	363.142	POS	0.0717819	0.0790242	0.0588272	0.0686239	0.0945175	0.0555053	0.050477	0.0583401	0.0625127	0.0546615	0.0580034	0.0723462
695	Alpha-Hydroxyisobutyric acid	41.7754	103.041	NEG	0.482114	0.260752	0.091943	0.327902	0.311015	0.453804	0.0983378	0.197343	0.0925263	0.212183	0.194234	0.122269
696	Aminoadipic acid	26.5533	160.062	NEG	0.459188	0.718423	0.773884	0.395195	0.562756	0.355515	0.500994	0.481504	0.441082	0.335605	0.342516	0.416322
697	Beta-Leucine	28.3266	130.088	NEG	0.196278	0.115098	0.19117	0.257805	0.473204	0.200795	0.207466	0.192285	0.185378	0.152826	0.191335	0.216918
699	Glyceric acid	26.8806	105.02	NEG	0.589277	0.907282	0.611463	0.796512	0.72258	0.478413	0.393453	0.333938	0.536583	0.3475	0.362178	0.354252
700	Levoglucosan	25.6224	161.046	NEG	1.06169	1.78462	1.32577	1.30406	1.18547	0.915956	0.796364	0.776492	0.969324	0.792968	0.716027	0.884028
701	Pyrrolidonecarboxylic acid	25.6227	128.036	NEG	1.31845	0.995848	1.38903	1.03225	1.45567	1.19265	1.14595	1.18399	1.35702	0.95918	1.20085	1.25346
702	Isobutyrylglycine	24.9488	144.067	NEG	1.27062	1.98996	1.36338	2.22483	1.79299	0.69733	0.700811	0.972374	0.878711	0.617517	0.544763	0.548668
704	1,3,7-Trimethyluric acid	26.7252	209.068	NEG	7.2887	15.16	14.3241	8.28918	7.69365	6.53602	6.64794	5.38967	9.45762	5.73468	4.2931	5.86831
705	Dimethylstrobochrysin	148.445	297.11	POS	0.0403486	0.0419146	0.0355585	0.0368755	0.0473744	0.0423898	0.0327382	0.0339716	0.0367695	0.0382423	0.0337668	0.037195
706	Malonic acid	31.2592	103.004	NEG	0.577321	1.8061	1.53481	0.768333	0.820505	0.35719	1.13925	0.583392	1.31741	0.781705	0.786365	0.918521
707	3',4',5',7,8-Pentamethoxyflavone	155.237	373.126	POS	0.155029	0.181357	0.167289	0.161066	0.1843	0.161804	0.174068	0.160587	0.167046	0.178367	0.162173	0.158318
709	Ginkgolic Acid (C13:0)	264.238	319.229	NEG	0.610763	0.786233	0.73335	0.66717	0.604744	0.702291	0.797312	0.807163	0.552834	0.650863	0.732691	0.646105
710	4',7-Dihydroxy-2',5-dimethoxyisoflavanone	141.296	317.099	POS	0.007456	0.0229282	0.0152434	0.0345444	0.0665708	0.00742341	0.0070854	0.00723423	0.00228478	0.00644416	0.00686325	0.00832666
711	Taccagenin	329.603	447.31	POS	0.0154167	0.0191137	0.0172238	0.0186037	0.0163051	0.0125351	0.0182232	0.0232132	0.0303567	0.0162668	0.0117951	0.0114758
712	2-hydroxy-2-(4-hydroxy-3-methoxyphenyl)acetic acid	148.096	197.047	NEG	0.357499	0.606808	0.63165	0.465017	0.479378	0.398504	0.648489	0.56505	0.673602	0.575429	0.576285	0.551067
713	Platycodigenin	269.483	503.332	POS	0.222598	0.199929	0.228031	0.201383	0.183629	0.131291	0.249015	0.277867	0.238844	0.280146	0.289572	0.262857
714	Angelicain	279.437	291.092	NEG	0.260261	0.277168	0.25623	0.258284	0.221229	0.179886	0.202324	0.318054	0.415252	0.211525	0.182926	0.164623
715	Oxoadipic acid	32.3365	159.03	NEG	1.56609	1.49791	0.957533	1.03813	0.630784	0.658981	0.818138	0.668268	1.06267	0.667848	0.646917	1.32799
716	D-Tartaric acid	279.435	149.01	NEG	0.160414	0.168262	0.144969	0.163677	0.139623	0.104612	0.127628	0.177721	0.214744	0.142994	0.139766	0.124766
717	7,12-Dimethylbenz[a]anthracene	209.862	257.127	POS	0.0233986	0.0167778	0.0152394	0.0331029	0.0688333	0.0187177	0.0142881	0.0133733	0.0091923	0.0130114	0.0112686	0.0160565
718	Myristic acid	306.64	227.203	NEG	13.7066	14.0335	11.6097	11.9288	13.1133	11.7017	11.756	10.8776	11.8815	9.8098	14.9977	11.6237
719	L-Glutamic acid	25.6093	146.046	NEG	2.49827	1.97232	2.60162	2.25769	3.38428	2.1854	3.24961	3.41765	2.62245	2.41456	3.21125	3.31724
720	6-Methylcoumarin	190.567	161.058	POS	0.247103	0.261019	0.238051	0.261749	0.259282	0.240269	0.230634	0.243451	0.248028	0.234277	0.226311	0.221033
721	N-Acetyl-S-(N-methylcarbamoyl)cysteine	13.0031	221.058	POS	0.0209129	0.0210884	0.0201094	0.0228865	0.0226314	0.0120873	0.010875	0.019083	0.0200398	0.0210182	0.0139827	0.0198754
722	7-Methoxycoumarin	174.592	177.053	POS	0.290842	0.281198	0.304249	0.294372	0.312038	0.289373	0.300327	0.277268	0.272075	0.278881	0.285473	0.314992
723	Mosloflavone	188.627	297.078	NEG	1.6788	1.2567	1.19517	1.53303	1.44879	1.38633	1.73151	1.49217	1.23519	1.6589	1.73711	2.08176
724	Myricetin	316.552	317.031	NEG	0.00939282	0.0208948	0.0168093	0.0114883	0.0148836	0.0150406	0.0171464	0.0182492	0.0162486	0.0136382	0.0114885	0.0161887
725	N-Acetylarylamine	64.31	134.062	NEG	0.482973	0.57167	0.453935	0.536223	0.31613	0.396364	0.403515	0.355724	0.468651	0.381839	0.403776	0.410846
727	Flavidulol B	290.84	259.167	POS	0.0158598	0.0126612	0.0137304	0.0116211	0.0159246	0.018257	0.0129178	0.0131615	0.0117378	0.0179467	0.0135393	0.0172956
728	Lopinavir	269.485	611.353	POS	0.00322766	0.00393279	0.0024299	0.00238221	0.00381476	0.00311616	0.00186998	0.00391892	0.00336375	0.00210941	0.00204827	0.00201768
729	D-fructose 1-phosphate	29.6666	259.024	NEG	0.0910248	0.0839991	0.348455	0.108135	0.0889092	0.0675738	0.0825046	0.135163	0.142036	0.0747908	0.0845367	0.11999
730	Combretastatin A4	176.819	317.136	POS	0.194194	0.18412	0.192735	0.180083	0.232256	0.179832	0.231634	0.180817	0.215801	0.160741	0.172105	0.193205
731	Eremosulphoxinolide A	26.0971	465.205	POS	2.16075	1.41676	1.7313	1.56913	2.18069	1.55431	1.63762	2.23774	1.88529	1.77614	1.86948	1.75607
732	Camelliaside A	160.831	755.207	NEG	0.0661051	0.262513	0.134277	0.108485	0.187534	0.11532	0.109307	0.129821	0.20209	0.0840339	0.11196	0.0918844
733	Sulcotrione	308.611	327.016	NEG	0.0689074	0.336945	0.185197	0.13019	0.0877949	0.16027	0.228922	0.191564	0.207631	0.187539	0.204658	0.312263
735	Cirsiliol	219.203	329.069	NEG	0.422322	1.16697	1.70158	0.340457	0.446693	0.842453	0.452435	0.766831	0.785682	0.607841	0.824871	0.596412
736	Dihydromyricetin	183.331	319.048	NEG	3.39614	5.65866	5.18455	4.08409	5.39586	3.59694	3.24734	3.91786	3.45488	3.53777	3.72122	4.23271
737	4-(Hydroxymethyl)benzenediazonium(1+)	139.731	136.061	POS	0.159124	0.0466484	0.0633974	0.108789	0.0756596	0.101118	0.0938023	0.198937	0.0585795	0.0722037	0.0953792	0.0877157
739	Trehalose 6-phosphate	44.798	421.083	NEG	0.219975	0.343545	0.19483	0.281767	0.227735	0.177452	0.198605	0.137624	0.247744	0.245022	0.194615	0.147176
741	beta-Santalal	223.767	219.173	POS	0.0484357	0.0226641	0.0174403	0.0323248	0.0104775	0.0197897	0.0256486	0.039984	0.0156154	0.0101278	0.00685054	0.0156886
742	Tetramethylsilane	178.55	301.141	POS	0.618181	0.690784	0.435902	0.56013	0.781468	0.503653	0.397043	0.451086	0.476995	0.493976	0.399401	0.496912
743	Cytarabine	77.4769	242.076	NEG	0.0197679	0.0267671	0.00753486	0.0189975	0.00951465	0.0186363	0.0382966	0.0504359	0.0247947	0.032539	0.0396607	0.03269
744	Clitorin	160.63	741.217	POS	0.0308902	0.0525831	0.0395245	0.0834204	0.0367244	0.0405002	0.0380908	0.0716172	0.0439644	0.0750923	0.07066	0.042377
745	N'-Formylkynurenine	68.1232	237.085	POS	0.0234845	0.0246854	0.0231193	0.0149885	0.0358942	0.012041	0.0165829	0.0150008	0.0167402	0.0179894	0.01338	0.0127337
747	beta-Zearalenol	165.107	271.094	POS	0.588569	1.07096	0.655521	0.954509	0.601984	0.639455	1.01581	0.624015	0.587929	0.68771	0.626795	0.597911
748	Prostaglandin D2	221.773	351.219	NEG	0.362155	0.307618	0.395966	0.365103	0.322897	0.380791	0.62853	0.544067	0.473392	0.519905	0.567326	0.5436
749	Kanzonol O	28.1852	383.142	POS	0.0190636	0.0587961	0.0501353	0.0242661	0.030926	0.0343468	0.0228622	0.019745	0.0344532	0.0379263	0.0307227	0.0175157
751	H-Phe-Trp-OH	192.092	334.153	POS	0.043839	0.0522106	0.0364883	0.079176	0.0389092	0.0498582	0.0378463	0.0293839	0.0337342	0.0428244	0.0277852	0.0334791
752	Oleanolic acid 28-O-β-D-glucopyranoside	268.219	677.431	NEG	0.0524141	0.047753	0.0692356	0.0489484	0.0576528	0.0363882	0.0516052	0.0432664	0.0829471	0.0576982	0.0420287	0.0538695
753	Bempedoic acid	255.25	327.25	POS	0.0344785	0.024663	0.0303045	0.0581309	0.0194944	0.0120875	0.0302228	0.0286617	0.0185197	0.0479895	0.0365402	0.0261545
756	Benorilate	254.938	331.128	POS	0.0217701	0.0231341	0.0213627	0.0212022	0.0192774	0.0125228	0.0192367	0.0255202	0.0417206	0.0224317	0.0173138	0.0152364
757	Salvigenin	186.623	327.088	NEG	0.686919	0.647882	0.784422	0.664794	1.11973	0.710308	0.706227	0.852279	0.555083	1.02066	0.798385	0.802974
758	Cyclogalegenin	226.432	491.371	POS	0.0915964	0.0841345	0.093792	0.0683432	0.0961776	0.062218	0.168992	0.137078	0.119047	0.107422	0.174186	0.110534
759	Zapotin	166.779	343.115	POS	0.164679	0.19393	0.191128	0.163211	0.245183	0.227952	0.251698	0.141365	0.199856	0.147975	0.138075	0.172023
760	Etofylline	244.392	225.1	POS	0.011491	0.009355	0.00650667	0.00804829	0.00709189	0.0081514	0.00578584	0.00735818	0.00663954	0.00586474	0.00714672	0.00691001
762	Sesamolin	217.84	371.11	POS	0.0389475	0.0424142	0.0483971	0.0354591	0.0751282	0.0515887	0.153431	0.136404	0.0752383	0.085462	0.110539	0.107786
764	Methyl (3x,10R)-dihydroxy-11-dodecene-6,8-diynoate 10-glucoside	153.569	399.162	POS	0.0724032	0.112738	0.0647266	0.111139	0.0928007	0.0714502	0.0682838	0.0722867	0.0787811	0.0889875	0.0493057	0.0509806
765	Isocitric acid	33.9304	173.01	NEG	0.138155	0.398257	0.533483	0.35226	0.439849	0.0832975	0.261679	0.0810083	0.268889	0.221552	0.207761	0.151522
767	Demethylated antipyrine	29.3063	175.085	POS	0.0704561	0.105896	0.0678562	0.11739	0.0891403	0.0796179	0.0523984	0.0496409	0.0588757	0.0633802	0.0415406	0.0412439
768	p-Hydroxyphenethyl trans-ferulate	144.487	315.121	POS	0.0598406	0.0976486	0.0681434	0.0732303	0.0911165	0.0806728	0.0601049	0.0619927	0.0742259	0.0684507	0.0619561	0.0582086
769	Vasicinone	206.54	185.07	POS	0.18218	0.182335	0.167608	0.186537	0.181881	0.175695	0.15765	0.164793	0.177795	0.149676	0.144744	0.155374
770	2-Furoylglycine	73.0515	168.031	NEG	0.0126229	0.0119844	0.0145337	0.0208281	0.00811805	0.014932	0.0170405	0.0162168	0.0145171	0.014894	0.0152848	0.0158263
771	5,7-dihydroxy-2-(2,3,4-trihydroxyphenyl)-4H-chromen-4-one	227.097	283.026	NEG	1.30207	1.44709	0.794795	0.879594	1.62476	0.911589	1.74825	1.10591	1.7847	0.912315	1.15822	1.67103
772	Heneicosanoic acid	313.904	325.313	NEG	0.513275	1.48531	1.57349	1.58894	1.59761	1.53336	1.72466	1.47244	1.40491	1.86841	1.69881	1.19408
773	Paeonolide	184.579	461.157	POS	0.0688905	0.0519934	0.0722169	0.0462075	0.0706591	0.0510903	0.0614236	0.0558127	0.0467171	0.0587295	0.0359007	0.0878563
774	Puerarin 6''-O-Xyloside	176.729	607.169	NEG	0.92638	0.802485	0.466288	1.03834	0.580003	0.690973	0.847949	0.614269	0.903379	0.59422	0.954431	0.801385
775	Raspberry ketone glucoside	87.1092	371.136	NEG	0.120352	0.202888	0.0721496	0.101578	0.144438	0.11287	0.062133	0.0835159	0.118219	0.130177	0.0177197	0.0635419
776	3,4,5-Trimethoxycinnamic acid	153.771	297.1	NEG	0.925115	1.04283	0.939822	0.768382	1.11766	0.741647	0.401561	0.528789	0.561052	0.645939	0.525586	0.548831
778	Ethyl -3-hydroxybutyrate glucoside	150.371	295.137	POS	0.0444048	0.0478519	0.0443023	0.0416251	0.0392711	0.0299964	0.0410934	0.0521168	0.0792238	0.0448983	0.0368076	0.0325574
779	Sinensetin	192.578	371.115	NEG	6.06043	4.90181	6.26021	6.52152	6.6512	5.23859	6.01757	6.85122	6.71127	7.02253	7.19226	6.73494
780	Benzaldehyde	160.471	107.048	POS	0.143146	0.147524	0.11109	0.135906	0.17604	0.112293	0.105242	0.106952	0.141129	0.113116	0.123863	0.124967
781	Scoparone	185.263	207.064	POS	0.0660533	0.127148	0.12075	0.0689962	0.200339	0.0539996	0.105271	0.0872755	0.117428	0.0635339	0.106859	0.102659
782	alpha-Ketoisovaleric acid	24.0683	115.041	NEG	0.20196	0.37281	0.224227	0.159446	0.170408	0.24039	0.181002	0.222315	0.258835	0.26088	0.225873	0.216973
783	2''-Methoxy--oleuropein	181.271	571.212	POS	0.188471	0.21334	0.209618	0.18651	0.214881	0.216515	0.227204	0.20265	0.210712	0.189842	0.234376	0.213135
784	L-Valine	24.8624	118.085	POS	1.32889	1.34358	1.37467	1.10394	1.34622	1.03754	1.61714	1.6954	1.68138	1.36464	1.70697	1.65134
785	Neoanhydropodophyllol	165.66	401.169	POS	0.0766661	0.0260385	0.055335	0.0531789	0.135005	0.092638	0.0752476	0.0793123	0.0533411	0.0415938	0.0526	0.0735803
786	N6-Etheno 2'-deoxyadenosine	90.4873	274.095	NEG	0.136868	0.369479	0.247541	0.186586	0.204366	0.149296	0.191541	0.227062	0.179592	0.191747	0.157066	0.152275
787	Propyl 2,4-decadienoate	197.175	211.168	POS	0.178463	0.162295	0.1093	0.135143	0.0863551	0.102457	0.121566	0.0741092	0.105587	0.148564	0.255121	0.0873321
788	Estriol	222.308	289.178	POS	0.0958448	0.0708622	0.0622329	0.110039	0.154467	0.0814393	0.0468695	0.0333731	0.0518204	0.0393915	0.0512731	0.0440422
789	Questiomycin A	170.558	213.064	POS	0.566437	0.690601	0.633417	0.567447	0.47299	0.480161	0.491172	0.503987	0.646256	0.470638	0.50143	0.499511
790	1-Phenyl-1,3-pentadecanedione	293.428	317.245	POS	0.0169819	0.0149374	0.017005	0.0137067	0.0125908	0.0157547	0.0140526	0.01465	0.0117979	0.0186351	0.020124	0.0155853
791	5,7-Dihydroxy-3',4'-dimethoxy-8-(3-hydroxy-3-methylbutyl)-isoflavone 7-glucoside	162.119	563.207	POS	0.0326846	0.0425861	0.0329241	0.0430221	0.036557	0.0629507	0.0230815	0.0179905	0.0211351	0.0264661	0.0190509	0.0126232
792	Fisetin	209.802	287.053	POS	0.712528	1.02047	0.48867	0.460458	0.885465	0.635927	0.590411	0.611908	0.761864	0.754045	0.628225	0.594239
793	(-)-1-(Methylthio)propyl 1-propenyl disulfide	32.842	195.031	POS	0.0182244	0.0214505	0.0371864	0.0227472	0.0228186	0.0221576	0.0462503	0.0456031	0.0665315	0.0487848	0.0290479	0.0316117
794	Rutacultin	27.9625	275.121	POS	0.0781585	0.12318	0.103769	0.0724126	0.101423	0.0666422	0.0542733	0.0334447	0.0917168	0.0557389	0.0466073	0.0635003
795	Swertianolin	149.168	435.095	NEG	0.157929	0.249078	0.0856738	0.178881	0.187737	0.138099	0.120841	0.192904	0.278436	0.153334	0.225233	0.189238
796	Betulinic acid	326.633	455.356	NEG	3.47466	3.23895	3.14467	6.31072	2.77373	2.66491	5.48147	3.7038	5.50689	3.57907	3.9645	3.68518
797	Cerasinone	169.9	331.115	POS	0.257463	0.224264	0.246762	0.235074	0.273535	0.207451	0.293515	0.226661	0.211839	0.243863	0.252659	0.256348
798	Thujyl 19-trachylobanoate	305.061	439.355	POS	1.6692	1.73805	1.69604	1.37561	1.4474	1.85006	1.56848	1.58471	1.69816	1.90677	1.84582	1.78066
799	Daphnetin	183.33	177.02	NEG	10.8019	23.8834	19.4568	13.4023	19.0751	11.4104	11.9086	15.6445	13.4842	13.2376	13.5457	15.1305
800	Kaempferol	356.282	285.042	NEG	0.0332667	0.0699986	0.0500856	0.0446804	0.0600228	0.0361879	0.0381315	0.0459042	0.0363843	0.0408271	0.0386913	0.0457159
801	Jasmonic acid	225.11	209.119	NEG	0.526017	0.412031	0.389016	0.655689	0.835751	0.532978	0.223755	0.189176	0.293315	0.211504	0.208683	0.214596
802	Oleuropein	188.573	523.192	POS	0.433744	0.469356	0.450152	0.413292	0.45052	0.437057	0.440029	0.404815	0.433944	0.392077	0.403086	0.452995
803	Rhein	353.651	301.037	NEG	0.138934	0.331206	0.220266	0.19473	0.209103	0.161189	0.187142	0.014615	0.171961	0.23674	0.193896	0.102693
804	3'-Hydroxypterostilbene	147.218	273.11	POS	0.196384	0.185797	0.232502	0.203157	0.159534	0.237983	0.222447	0.180183	0.19322	0.215444	0.209919	0.19135
805	(1Z,4Z)-1,5-bis(4-hydroxyphenyl)-1,4-pentadiene	188.087	253.12	POS	0.0290241	0.0405156	0.0152175	0.0298407	0.0459201	0.0112032	0.0155337	0.00989397	0.0140821	0.0217977	0.0154255	0.0179545
807	6,7,8-Trimethoxy-2H-1-benzopyran-2-one	144.386	237.074	POS	0.0274308	0.0240996	0.0256215	0.0238397	0.0194068	0.0235368	0.0276407	0.0233996	0.0255391	0.0246963	0.027605	0.0279809
808	5-Deoxykievitol	55.8837	357.131	POS	0.0427842	0.0472153	0.0372891	0.0334469	0.0685366	0.0532517	0.038052	0.0319461	0.0372061	0.0445423	0.0329422	0.0417508
809	2'-Hydroxy-4'-methylacetophenone	199.159	149.062	NEG	0.632711	0.894212	0.499415	0.551659	0.669794	0.580542	0.359501	0.356872	0.603	0.525858	0.346775	0.375422
810	all-trans-Retinoic acid	233.716	301.213	POS	0.0378195	0.0475732	0.0438333	0.0491407	0.0555924	0.0412526	0.052826	0.03682	0.0364497	0.0387925	0.0421145	0.0388199
811	6-Hydroxynicotinic acid	30.3544	138.02	NEG	0.0338617	0.0606894	0.0477914	0.0522212	0.0569367	0.0605273	0.0647708	0.0437259	0.0527542	0.0621588	0.048511	0.0469585
812	6-Biopterin	31.2496	220.08	POS	0.00980537	0.00654545	0.00969271	0.0100424	0.0114497	0.0142253	0.0136444	0.0340793	0.00412158	0.00942981	0.013384	0.0108556
813	L-Phenylalanine	166.793	164.072	NEG	1.19125	1.92845	1.21608	1.30919	2.19521	1.06948	1.36237	1.18102	2.07003	1.65644	1.18598	1.17142
814	Tuberostemonine	239.682	376.257	POS	0.0840417	0.129328	0.0759486	0.0906348	0.0732215	0.0649874	0.0744416	0.0366306	0.0527812	0.0341884	0.0442862	0.0401271
815	4-Methylumbelliferone	197.182	175.041	NEG	0.478405	0.416304	0.328949	0.44542	0.412472	0.366025	0.361482	0.359124	0.365007	0.35093	0.341883	0.366096
816	Kinsenoside	27.9553	323.1	NEG	0.242602	0.240751	0.20483	0.321605	0.22732	0.236283	0.132856	0.112046	0.188396	0.196958	0.127758	0.140579
817	(7'x,8'x)-4,7'-Epoxy-3,8'-bilign-7-ene-3,5'-dimethoxy-4',9,9'-triol	174.204	359.147	POS	0.761681	0.981159	0.819523	0.902748	1.10504	0.840247	0.979313	0.810341	0.931815	0.963476	0.884691	0.798669
818	Colutehydroquinone	166.83	331.121	NEG	0.790613	0.645266	1.76611	0.667441	0.988687	0.606939	0.669215	0.91221	0.695189	0.723483	0.770208	0.894668
820	3,4-Dimethoxyphenylacetic acid	27.9625	197.079	POS	0.0192133	0.0215515	0.01811	0.0291064	0.0427576	0.0194315	0.0133136	0.0123165	0.0156611	0.0144666	0.0136373	0.0121854
821	Laurdan	317.788	354.283	POS	0.0218318	0.0243689	0.0209396	0.0170627	0.023363	0.0262084	0.0138447	0.0181437	0.0246756	0.021409	0.032168	0.0214142
822	Chorismate	55.4623	225.042	NEG	0.347376	0.414281	0.370227	0.384597	0.449663	0.238619	0.276288	0.292249	0.334938	0.242705	0.276442	0.325287
823	5,6-DHET	278.062	339.251	POS	0.241671	0.232728	0.232322	0.237872	0.206222	0.203148	0.272177	0.254194	0.419438	0.243046	0.211624	0.159919
824	Lubiprostone	275.383	408.25	POS	0.0342614	0.0292382	0.0294665	0.026845	0.0256861	0.0264472	0.0344118	0.0316959	0.0576926	0.031359	0.0302941	0.0230274
826	Azadirachtin B	160.313	707.258	NEG	0.314017	0.402151	0.237072	0.393245	0.426621	0.41611	0.169104	0.0901602	0.144643	0.190083	0.103268	0.0637219
827	2,3-Dinor-6-keto-prostaglandin F1 a	266.853	309.203	POS	0.0330049	0.0211338	0.0174272	0.0345724	0.0513716	0.0267217	0.0127587	0.00934572	0.0200366	0.0102461	0.0146679	0.0132203
828	Dimethyl dialkyl ammonium chloride	237.06	304.297	POS	0.0426762	0.0383314	0.0372447	0.0406077	0.0457773	0.0393529	0.0469267	0.051211	0.0414985	0.0414122	0.0504215	0.0390806
829	4-Methylbenzoic-acid	29.2183	135.046	NEG	0.58626	0.524535	0.372538	0.327081	1.0584	0.536479	0.321714	0.303969	0.481151	0.477244	0.328868	0.321643
830	8-Hydroxypinoresinol 4-glucoside	174.601	537.208	POS	0.198869	0.210279	0.229556	0.179452	0.274835	0.266812	0.285386	0.253679	0.238419	0.184916	0.263674	0.203584
831	2,3-Dihydro-4-(4-methoxyphenyl)-1H-phenalene-1,2,3-triol	149.624	323.126	POS	0.0177437	0.0242862	0.0104582	0.0173663	0.0145447	0.0233737	0.0149113	0.0147918	0.0147602	0.0125722	0.0140414	0.0147677
832	Polygalacic acid	284.114	503.342	NEG	1.70466	1.5469	1.88532	1.58757	3.40175	1.70849	1.64139	1.71727	1.80021	5.22443	2.5866	1.86077
833	Methyl bisnorbiotinyl ketone	154.76	215.08	POS	0.734888	0.865055	0.64425	0.911267	0.693632	0.674206	0.608157	0.606384	0.729995	0.676448	0.556307	0.562529
834	Ginkgolide A	154.896	407.137	NEG	2.24997	3.01082	2.50543	2.65605	3.37121	2.49013	2.35517	2.07252	2.60987	2.34614	2.386	2.1111
835	Ginkgolic acid C15:1	271.519	345.245	NEG	0.346406	0.395129	0.413809	0.360477	0.287254	0.44679	0.377947	0.425976	0.377037	0.417771	0.440711	0.429892
836	S-[1-[2-(Acetyloxy)ethyl]butyl] ethanethioate	173.661	219.1	POS	0.481231	0.738845	0.574786	0.541107	0.715492	0.90271	0.229698	0.231221	0.551139	0.677576	0.237743	0.490657
837	Forsythoside E	161.972	463.172	POS	0.124315	0.140471	0.126751	0.124181	0.142439	0.125277	0.111351	0.11169	0.114399	0.119863	0.11167	0.119441
838	Pinoresinol Diglucoside	187.075	683.243	POS	0.217941	0.200441	0.221641	0.216557	0.207558	0.228045	0.206071	0.194323	0.202564	0.196735	0.191096	0.219456
839	3-Methyl-1-(2,4,6-trihydroxyphenyl)-1-butanone	56.2249	211.095	POS	0.130945	0.194731	0.0535406	0.259916	0.0784228	0.152197	0.123905	0.0733369	0.129463	0.069752	0.0834835	0.0691246
840	2-O-Acetyl-20-hydroxyecdysone	282.07	521.31	NEG	0.751591	0.39405	0.546816	0.774547	1.25833	0.645767	0.594443	0.650274	0.761646	0.797477	0.460864	0.632632
841	Carnosol	274.134	331.188	POS	0.0064884	0.00521818	0.00512887	0.00517464	0.00597119	0.00493138	0.0089533	0.00740787	0.0136222	0.00606659	0.00591175	0.00386881
842	Elenaic acid	136.89	243.084	POS	0.124598	0.189744	0.132345	0.137643	0.195267	0.105259	0.0853531	0.0728504	0.120476	0.0879345	0.0824692	0.0816956
843	5,7-dihydroxy-3-{[3,4,5-trihydroxy-6-(hydroxymethyl)oxan-2-yl]oxy}-2-(3,4,5-trihydroxyphenyl)-4H-chromen-4-one	352.386	481.099	NEG	0.160658	0.122003	0.0920103	0.200665	0.0990437	0.109335	0.124571	0.0672592	0.133795	0.107426	0.16597	0.118961
844	Corylin	197.781	321.11	POS	1.0843	1.35486	1.22501	1.24185	1.22096	1.28296	1.46046	1.23403	1.30789	1.23852	1.36967	1.22033
845	Beta-Acetoxyisovalerylshikonin	163.558	447.168	NEG	0.383789	0.423367	0.347179	0.302813	0.337166	0.322175	0.281896	0.302823	0.416388	0.258863	0.280592	0.395569
846	10beta-12,13-Dinor-8-oxo-6-eremophilen-11-al	173.261	207.136	POS	0.126769	0.139201	0.143151	0.073966	0.0929421	0.129597	0.131838	0.0836364	0.0588742	0.133151	0.147569	0.0989303
847	L-Fucose	24.2826	163.062	NEG	1.2257	0.597059	0.903691	0.802534	1.26169	1.2323	1.37063	1.55799	1.13697	1.31545	1.38756	1.54737
848	3,4',5-Trihydroxy-3',7-dimethoxyflavanone	181.882	333.094	POS	2.50585	4.90924	4.79475	3.50841	3.81339	2.38183	2.12736	2.88745	2.21145	2.06429	1.93806	2.60515
849	Neriifolin	268.815	517.313	POS	0.0851457	0.0718326	0.0811881	0.079304	0.0689179	0.0894738	0.0832533	0.0784939	0.0854265	0.00875418	0.101796	0.0997472
850	(Â±)-(Z)-2-(5-Tetradecenyl)cyclobutanone	308.776	265.25	POS	1.0648	1.07964	0.842295	0.852464	1.24262	1.02535	1.34366	0.936351	0.88962	0.845006	0.690459	1.46764
851	5-O-Methylembelin	241.758	309.203	POS	0.134856	0.0969961	0.0865071	0.149605	0.199024	0.119458	0.0566717	0.0508641	0.0747749	0.0607809	0.0614135	0.0621728
852	4-Hydroxystyrene	50.0341	119.051	NEG	0.262864	0.436836	0.330487	0.240222	0.361955	0.261473	0.239712	0.13424	0.38818	0.290238	0.232705	0.184109
853	1,2,3,4,Tetrahydro-1,5,7-trimethylnapthalene	232.657	175.147	POS	0.0597639	0.0548527	0.0606468	0.0597765	0.0630565	0.0579363	0.0745064	0.0894136	0.0598063	0.0713839	0.0792314	0.0804922
854	U-0521	174.754	179.072	NEG	1.21051	1.51303	1.30608	1.5898	1.98281	1.55746	1.59463	1.31702	1.44079	1.62823	1.39246	1.14369
855	Icotinib	138.929	390.15	NEG	0.300161	0.525671	0.165425	1.16472	0.362928	0.376434	0.291157	0.225956	0.377794	0.116471	0.185753	0.214748
856	Isoliquiritin apioside	201.821	551.188	POS	0.242104	0.227403	0.24248	0.235289	0.250072	0.227873	0.248391	0.242921	0.277458	0.232792	0.265107	0.23662
857	Behenic acid	330.483	339.328	NEG	6.15359e-05	3.03794	3.85742	4.99326	3.90904	4.33959	4.89421	3.57083	4.99812	4.06341	3.7411	2.67058
858	Griffonilide	92.8791	227.058	NEG	0.0609707	0.0440085	0.0833612	0.108553	0.0557028	0.0325925	0.0665559	0.0574801	0.0497692	0.100876	0.067957	0.0722596
859	17alpha-Hydroxyprogesterone	239.717	331.225	POS	0.00992254	0.00957854	0.016226	0.0317968	0.0197738	0.0121649	0.0341357	0.0306345	0.014029	0.0273179	0.0303071	0.0302772
861	Methylophiopogonanone B	173.58	327.125	NEG	7.21642	8.60213	7.4944	8.83315	10.828	7.924	9.35629	7.31882	8.65719	8.46596	7.85877	7.63037
862	Methyl 2-(2-methoxy-4-hydroxyphenyl)-6-methoxy-3-benzofurancarboxylate	165.913	329.099	POS	0.136817	0.114544	0.122138	0.122554	0.117003	0.132912	0.14804	0.133396	0.124923	0.138619	0.148437	0.152987
863	Bay K 8644	207.22	355.084	NEG	1.44803	1.46837	1.29136	1.29259	1.46604	1.17906	1.5014	1.50752	1.34961	1.50375	1.48331	1.62714
864	Resveratrol	198.512	227.072	NEG	0.766233	0.504707	0.799359	0.714356	0.779568	0.408839	0.350696	0.512749	0.503039	0.572099	0.396	0.703198
865	Tyromycic acid	300.502	453.334	POS	0.427169	0.415472	0.454404	0.470417	0.388328	0.422957	0.364456	0.374239	0.479434	0.52183	0.458224	0.435789
866	Pterostilbene	178.543	257.115	POS	0.264836	0.290746	0.200848	0.253664	0.341176	0.209753	0.191421	0.207788	0.201517	0.215434	0.18412	0.223955
867	5-Hydroxy-4',7-dimethoxy-6-methylflavone	185.444	313.105	POS	0.0902601	0.0780608	0.0813823	0.0692754	0.0876099	0.070022	0.0919694	0.0800638	0.0839788	0.067596	0.0766748	0.0996737
868	Phthalide	193.031	205.084	POS	0.113167	0.125004	0.170953	0.115394	0.140388	0.110655	0.101789	0.0907658	0.113968	0.093516	0.0911188	0.106257
869	Epiandrosterone	284.761	289.219	NEG	0.059085	0.0633412	0.0750638	0.0649765	0.0526842	0.0721379	0.0476694	0.0478089	0.0595161	0.109695	0.0657325	0.060094
870	Xylobiose	27.4204	281.089	NEG	0.835846	1.16474	1.00603	0.927381	1.0982	0.890273	0.725028	0.620028	0.932682	0.789996	0.562611	0.514706
871	12R-hydroxy-5Z,8Z,12Z-eicosatrienoic acid	294.977	323.255	POS	0.0421818	0.0183517	0.0150544	0.011201	0.112637	0.0170154	0.0194882	0.0056725	0.0318054	0.0191546	0.0240359	0.00742468
872	3,4-Dimethylbenzoic acid	153.985	151.074	POS	0.112826	0.140998	0.0821534	0.180143	0.0151971	0.0920621	0.0902201	0.0746389	0.148535	0.0924274	0.120146	0.0841889
873	Hebevinoside IX	279.392	591.425	POS	0.688539	0.611102	0.626972	0.642954	0.536137	0.569488	0.68287	0.686706	1.1242	0.679439	0.611543	0.515481
874	Inosinic acid	183.326	347.042	NEG	0.807657	1.65902	1.42165	1.05649	1.25188	0.79903	0.941854	1.1199	0.712221	0.85316	0.920147	1.20512
875	Thymoquinone	162.56	165.09	POS	0.0724233	0.087542	0.0776561	0.100022	0.088039	0.0777073	0.0653565	0.101818	0.0789439	0.063342	0.0606158	0.0614222
876	25-Hydroxyvitamin D2	300.502	413.339	POS	0.0533225	0.034112	0.0367598	0.029645	0.0393659	0.0356336	0.0545697	0.0461151	0.0465095	0.0414804	0.0522268	0.0487904
877	Ganoderic acid DM	296.577	467.319	NEG	1.18439	1.37658	2.14076	1.36707	1.2206	1.6728	1.16164	1.19055	1.34529	1.51929	0.406398	2.70249
878	3-(3,4-Dihydroxy-5-methoxy)-2-propenoic acid	160.954	209.047	NEG	1.1183	1.1774	0.888858	1.09604	1.00873	0.812006	0.765738	0.820579	0.90115	0.901131	0.807488	0.924996
879	4'-O-Galloylsucrose	223.203	495.125	POS	0.159197	0.23358	0.112178	0.120301	0.223832	0.148754	0.19003	0.129472	0.260586	0.108149	0.14825	0.192371
880	Hypoletin 8-gentiobioside	254.228	431.312	POS	0.0948947	0.0432242	0.0652783	0.0582559	0.0567552	0.123039	0.079669	0.106612	0.0909592	0.0683963	0.110947	0.0753253
881	N-(2-Hydroxypropyl)methacrylamide	25.6975	144.101	POS	1.78259	1.30344	1.80947	1.3096	2.3535	1.56255	2.75971	2.33725	2.05869	1.98538	2.3023	2.5291
882	4'-Hydroxyacetophenone 4'-[4-hydroxybenzoyl-(->5)-apiosyl-(1->2)-glucoside]	186.571	551.189	POS	0.26296	0.255079	0.261963	0.26662	0.237629	0.257881	0.286114	0.259223	0.271648	0.252912	0.288949	0.270996
883	1-Pyrenebutyric acid	163.901	289.116	POS	0.0314891	0.0372253	0.0371163	0.0355694	0.0374016	0.0257491	0.0207515	0.0135764	0.0238359	0.0130986	0.0192295	0.0140095
885	Ailanthone	173.919	399.139	POS	0.278657	0.300382	0.247096	0.292813	0.344033	0.267907	0.281022	0.241154	0.274468	0.269047	0.242046	0.264146
886	5-Hydroxy-N-formylkynurenine	27.9963	253.08	POS	0.0376678	0.0457702	0.0330167	0.0447996	0.027405	0.0357901	0.0270747	0.0241047	0.0315176	0.0295254	0.0257015	0.0253333
887	6-Angeloylfuranofukinol	250.273	333.201	POS	0.163436	0.127205	0.106673	0.225665	0.290713	0.146141	0.0671371	0.0582833	0.108211	0.0637753	0.070632	0.062709
888	Cysteinyl-Proline	29.7883	219.075	POS	0.0098429	0.0142306	0.0114705	0.00935354	0.012273	0.0107002	0.00791059	0.00953001	0.0101579	0.00839112	0.00839165	0.00721789
889	2-Acetylpyrazine	41.1574	123.054	POS	0.0170886	0.0156889	0.00773964	0.0193407	0.0138983	0.00909771	0.0141791	0.0248679	0.0119257	0.0130452	0.00499809	0.00544409
890	Picroside I	161.042	551.179	NEG	1.135	1.2757	0.924914	1.28526	1.67478	1.01149	1.03639	0.773086	0.90595	1.12056	0.859925	0.755018
891	Ampicillin	305.089	372.098	POS	0.0113277	0.0117876	0.00990384	0.0121224	0.00982941	0.00796167	0.00980174	0.0134031	0.00585198	0.0116889	0.0109508	0.0112414
892	Glyzarin	195.829	295.095	POS	0.15242	0.132203	0.0911782	0.127903	0.15161	0.0983373	0.091631	0.0886318	0.105256	0.0902235	0.0884293	0.118196
893	Dehydrovomifoliol	248.988	223.131	POS	0.0175405	0.0155664	0.00845082	0.0173784	0.0250183	0.0165084	0.00235564	0.00170463	0.0096136	0.00111887	0.00220703	0.00331027
894	Helicin	46.8114	329.089	NEG	7.65431	14.6915	9.42866	11.1363	10.2782	9.56337	7.10989	5.91515	7.47433	7.797	5.64795	5.47163
895	Lincomycin (hydrochloride monohydrate)	134.638	465.237	NEG	0.0317778	0.0926615	0.0755167	0.0311649	0.0693281	0.0282577	0.0186124	0.0375152	0.0554037	0.0742922	0.0274815	0.023872
896	PE(16:0/20:4(5Z,8Z,11Z,14Z))	318.394	740.516	POS	1.51574e-05	0.0186798	0.021066	0.0186859	0.0160002	0.0247367	0.0262489	0.0288811	0.0181742	0.0334932	0.025846	0.0176701
897	4-Hydroxyphenylpyruvic acid	162.163	179.036	NEG	0.769804	0.788543	0.384196	0.727601	0.709137	0.379795	0.657761	0.792294	0.665912	0.80318	0.717891	0.715137
898	Allantoin	25.4325	157.037	NEG	0.29986	0.13232	0.265416	0.189287	0.303293	0.235271	0.427342	0.479631	0.387588	0.329454	0.511363	0.542789
900	Rishitin	233.732	223.168	POS	0.0494633	0.0433151	0.0409223	0.0698772	0.117995	0.0454075	0.0317622	0.0472103	0.0514896	0.0292944	0.0310232	0.026813
902	Dattelic acid	84.2483	337.085	POS	0.0128405	0.00344187	0.0036438	0.0135713	0.000565932	0.00764204	0.00641639	0.00620171	0.0084788	0.00497829	0.00389602	0.00465689
903	7-Dehydrocholesterol	306.254	385.344	POS	0.00227312	0.0783648	0.0833035	0.087575	0.0583672	0.105542	0.162531	0.123861	0.0450187	0.105097	0.0877541	0.0569043
904	Hexyl 2-furoate	175.672	197.116	POS	0.0435739	0.0404216	0.0425017	0.0482359	0.0477368	0.0421309	0.0474288	0.0409162	0.0387614	0.057275	0.0526969	0.0444616
905	Physalin K	177.418	559.176	POS	0.00826327	0.00913481	0.00512937	0.00677216	0.00705245	0.00661144	0.00958123	0.00784697	0.00780886	0.00857356	0.00716622	0.00834165
906	18-carboxy dinor Leukotriene B4	251.622	321.171	POS	0.0582428	0.0382915	0.033854	0.0455209	0.0344498	0.0540014	0.0482181	0.042095	0.0830447	0.0474116	0.0506282	0.0258604
907	gamma-Glutamyltyrosine	190.16	311.126	POS	0.633195	0.817121	0.73191	0.824272	0.927214	0.756517	0.896666	0.782442	0.938109	0.93398	0.860816	0.722874
908	Harpagoside	159.665	512.21	POS	0.0517067	0.0886453	0.0604823	0.071425	0.076651	0.0821509	0.0457397	0.0552427	0.0667455	0.0677032	0.0519569	0.0423959
909	Limonin	161.18	515.196	NEG	4.61207	4.79973	5.26089	5.11367	4.53325	5.15354	5.01825	4.53211	4.82321	5.14909	4.8792	4.63839
911	3,4,5-trihydroxycyclohex-1-ene-1-carboxylic acid	26.9815	173.046	NEG	0.376119	0.482384	0.27649	0.27193	0.181992	0.258711	0.219058	0.268989	0.309922	0.248839	0.189761	0.28599
912	Allixin	189.987	227.126	POS	0.0581867	0.0750327	0.0607562	0.0677502	0.0751939	0.0463741	0.0359893	0.0422927	0.0510468	0.0255673	0.0176225	0.0139287
914	4,8,12,15-Octadecatetraenoic acid	258.237	277.214	POS	1.03271	0.861641	0.708994	1.24648	1.70991	0.983086	0.522182	0.461732	0.654989	0.512599	0.501465	0.532261
915	Gentiobiosyl 2-methyl-6-oxo-2E,4E-heptadienoate	184.534	479.167	POS	0.154162	0.153766	0.149188	0.159601	0.145435	0.14671	0.161732	0.149299	0.137675	0.147091	0.172624	0.183592
916	Isoverticine	284.765	490.364	NEG	0.883767	0.857582	1.00291	0.927839	0.718109	1.87065	0.96823	1.03295	1.00817	1.24122	1.06993	1.14278
917	2,3-Diisopropyl-5-methylphenol	207.231	193.157	POS	0.141806	0.157672	0.155754	0.107604	0.151721	0.0779674	0.126547	0.149652	0.156129	0.152514	0.133035	0.119117
919	Gluconolactone	30.5722	177.041	NEG	0.731936	1.51185	0.518405	0.783191	0.406191	0.727593	0.388015	0.628029	0.0793957	0.293986	0.564535	0.502595
920	Phloretin xylosyl-galactoside	174.525	569.197	POS	0.202336	0.41003	0.161201	0.142674	0.134306	0.14533	0.164313	0.213188	0.15018	0.157893	0.158097	0.215121
921	Deoxycholic acid disulfate	182.814	553.202	POS	0.682533	0.827518	0.738512	0.678202	0.700918	0.683961	1.04711	0.622025	0.685339	0.663977	0.64082	0.678866

## Sheet: Table S3
Table S3 The differentially abuntant metabolites detected by UHPLC-OE-MS in pindstrup soil versus control soil.
id	Putative metabolites	TR	m/z	Ion mode	Pindstrup soil 1	Pindstrup soil 2	Pindstrup soil 3	Pindstrup soil 4	Pindstrup soil 5	Pindstrup soil 6	Control soil 1	Control soil 2	Control soil 3	Control soil 4	Control soil 5	Control soil 6	VIP	P-VALUE	Differentially expression
6	Adenosine	46.6356	268.102	POS	0.173728	0.127607	0.158772	0.175745	0.172118	0.186114	0.125291	0.0841672	0.135392	0.122036	0.125719	0.0987045	1.60687	0.00142805	Up
7	4-Hydroxybenzaldehyde	164.19	121.03	NEG	3.92923	3.98179	4.9131	4.44157	3.7493	4.31137	8.21998	9.02426	5.77922	8.73601	9.7131	6.34604	1.88591	0.00151836	Down
14	4-Nitrophenol	199.161	138.02	NEG	1.08892	1.16337	1.22004	1.09772	1.31252	1.30769	2.47425	2.73962	1.4888	2.34458	2.22027	3.09571	1.87214	0.00260264	Down
16	Hydrogen phosphate	30.75	96.97	NEG	0.526291	0.519106	0.848747	0.611848	0.56275	0.651873	0.417919	0.454665	0.616675	0.356581	0.366606	0.337044	1.51749	0.0139277	Up
17	4-Methyl-2-pentenal	118.585	99.0798	POS	0.372601	0.378409	0.374559	0.402037	0.387002	0.383993	0.391109	0.385804	0.401676	0.401303	0.419229	0.393741	1.27226	0.0361235	Down
18	L-Malic acid	32.4554	133.015	NEG	1.74718	1.22134	1.69939	0.562458	1.42937	1.44659	1.78985	10.101	6.3272	4.81649	4.98703	1.06578	1.35834	0.0468696	Down
19	Didox	24.9452	168.034	NEG	6.40719	6.35838	5.57608	5.46624	6.2187	6.68108	5.2616	3.49887	4.31054	4.36293	5.04485	4.80105	1.6666	0.000710432	Up
21	Taurine	24.8601	124.008	NEG	0.623737	0.667384	0.639558	0.617569	0.566015	0.51872	0.447648	0.306082	0.370355	0.311691	0.487957	0.329427	1.81753	0.000124787	Up
23	Azelaic acid	199.159	187.099	NEG	4.5167	3.6965	4.57746	4.01371	3.53389	3.75107	7.9162	7.37431	5.81559	8.36317	9.17238	6.31567	1.92593	0.000617149	Down
26	4-Pyridoxic acid	24.8624	184.062	POS	2.32725	2.41608	2.13981	2.03415	2.32401	2.5009	2.12647	1.48784	1.91622	1.78408	2.03438	1.6684	1.55396	0.00360403	Up
27	Traumatic Acid	229.04	227.13	NEG	0.406929	0.425006	0.5459	0.459552	0.404018	0.429688	0.578249	0.469165	0.585305	0.713453	0.831211	0.538926	1.51839	0.0128783	Down
31	Vanillic acid	47.4067	167.036	NEG	7.27427	6.89848	7.69101	7.82746	5.86091	5.78271	7.97517	14.9803	9.55429	11.3581	10.9089	9.61349	1.64805	0.00930642	Down
35	Succinic acid	32.0414	117.02	NEG	0.607492	0.621243	0.661167	0.527471	0.469517	0.726675	0.75341	1.13913	0.832888	0.788589	1.06056	0.531059	1.29269	0.0289267	Down
36	Syringaldehyde	178.565	183.064	POS	0.0283735	0.0334623	0.0262798	0.0370761	0.0258633	0.0343765	0.0317694	0.0557195	0.0517949	0.0513056	0.0699505	0.0419764	1.57895	0.012093	Down
37	PC(16:2e/2:0)	279.364	520.336	POS	0.819668	0.855549	0.729203	0.728804	0.842388	1.06431	0.760144	0.383578	0.673654	0.499608	0.852999	0.536533	1.275	0.0293895	Up
45	Syringic acid	81.9796	199.059	POS	0.0483138	0.039112	0.0635699	0.0541333	0.0350822	0.0360364	0.0504699	0.117388	0.0771051	0.0687249	0.0845433	0.0596479	1.45269	0.0175019	Down
48	Glycerophosphocholine	24.6545	258.108	POS	0.488577	0.610434	0.543108	0.479539	0.562922	0.744858	0.237207	0.334399	0.307202	0.220016	0.278368	0.169755	1.89382	5.47743e-05	Up
51	(-)-Camphoric acid	207.114	199.098	NEG	0.19651	0.185837	0.220116	0.129019	0.205601	0.173467	0.377016	0.238892	0.304566	0.373538	0.482595	0.344738	1.77834	0.000821527	Down
52	Lapachol	144.335	241.088	NEG	8.97889	9.97813	9.64029	10.5877	9.11854	10.6307	11.5952	12.4491	10.9248	12.6634	12.4315	10.7917	1.71491	0.00117348	Down
57	Mannitol	24.8601	181.073	NEG	29.9975	31.031	28.0566	26.9056	30.6071	33.0171	25.9394	17.8504	22.7474	21.7289	27.9714	23.4062	1.56187	0.00270954	Up
61	D-Pinitol	25.4325	193.072	NEG	1.4303	1.0256	2.29437	1.10309	0.89601	1.09563	2.26304	6.44855	4.02093	3.17294	2.33999	1.79101	1.58055	0.0326531	Down
62	Harmanine	175.107	199.074	POS	0.0562515	0.057587	0.0573757	0.0658369	0.055808	0.0503454	0.0599921	0.0692335	0.0568079	0.0653924	0.0713989	0.0756828	1.32551	0.0266243	Down
63	(±)-Dihydroactinidiolide	221.177	181.121	POS	0.0402346	0.0355162	0.046548	0.0339189	0.0411055	0.0383413	0.0701436	0.0624984	0.0613993	0.0770253	0.110531	0.0749161	1.87987	0.00340126	Down
64	Ac-DL-Trp-OH	179.371	245.094	NEG	4.0155	5.98415	7.36569	5.71489	2.84085	4.05087	8.14451	11.1348	9.79145	4.61301	7.3912	7.60365	1.3055	0.020512	Down
66	Glutaric acid	52.3554	131.035	NEG	0.256616	0.26271	0.269604	0.264309	0.223562	0.254968	0.295945	0.498094	0.331022	0.329796	0.289639	0.46954	1.53733	0.0273949	Down
69	DL-Glutamine	24.2949	145.063	NEG	7.00549	8.08166	6.73221	6.6718	7.67432	7.75586	6.39846	4.18149	5.71112	5.27727	7.08146	5.75526	1.46314	0.00709797	Up
70	LPA(18:2)	333.823	433.238	NEG	1.88658	1.86044	1.24651	1.50814	1.42103	2.51747	1.06335	0.979749	1.68058	1.11703	1.05077	1.07784	1.42689	0.0221537	Up
75	Alisol A	250.321	549.382	NEG	5.14328	4.54862	3.00674	2.44065	5.56793	4.88776	3.26292	1.98367	2.126	2.02437	3.89761	2.69307	1.3133	0.0240033	Up
76	(R)-Leucic acid	176.071	131.072	NEG	0.951741	0.427198	0.806393	0.705967	0.571578	0.650692	0.918292	1.30025	1.56249	0.996948	0.964197	0.942028	1.53248	0.00805795	Down
82	Sesamol	179.416	137.025	NEG	0.861018	0.925574	1.04126	1.10369	0.823106	0.918928	1.23294	1.6145	0.956599	1.20276	1.49916	0.975225	1.33701	0.0285129	Down
86	LPE(16:0)	293.368	452.281	NEG	0.266523	0.254298	0.487306	0.354378	0.315524	0.28923	0.41577	0.575803	0.41788	0.852653	0.969896	0.649715	1.60183	0.00917187	Down
88	3-hydroxytetradecanoic acid	284.741	243.198	NEG	0.182249	0.194132	0.193027	0.189498	0.186487	0.183107	0.227018	0.231759	0.222674	0.238967	0.282191	0.251622	1.88094	0.00142626	Down
89	Dodecanedioic acid	235.053	229.146	NEG	0.265521	0.228577	0.245576	0.253806	0.242534	0.298713	0.411129	0.335717	0.28694	0.366971	0.449208	0.307883	1.69537	0.00339816	Down
90	Undecanedioic acid	224.433	215.13	NEG	0.576855	0.527957	0.620449	0.598805	0.574323	0.56303	0.946641	0.797059	0.715079	0.90438	0.931643	0.781877	1.92776	0.000529997	Down
92	1H-Indole-2,3-dione	160	146.025	NEG	0.868561	0.949732	1.07347	0.943225	0.787701	0.816458	1.19833	1.56913	1.29525	1.44583	0.892116	1.38126	1.57842	0.00402	Down
94	Noreugenin	188.624	191.036	NEG	2.71231	3.35467	3.72696	3.1946	3.10594	3.28959	4.24745	4.59612	3.70085	4.15676	4.62401	3.06425	1.39386	0.013363	Down
96	Indole-3-carboxaldehyde	190.542	146.059	POS	0.724727	0.738237	0.91962	0.772055	0.656837	0.651309	1.12343	1.43303	1.10776	1.39598	1.03658	1.47982	1.86863	0.00016317	Down
97	LPE(18:2)	282.13	476.281	NEG	0.938469	0.914899	0.887749	0.866519	1.01133	1.20517	0.803432	0.405537	0.849625	0.633671	0.917134	0.508935	1.34531	0.0154168	Up
103	Bayogenin	255.658	547.366	NEG	2.64297	3.22834	1.70218	1.88079	2.6194	2.72235	1.91757	1.57458	2.08245	1.67345	1.79597	2.24232	1.2069	0.0444261	Up
110	3-Hydroxybenzaldehyde	146.205	121.03	NEG	0.99926	1.06862	1.16256	1.05095	1.07119	1.08503	1.19714	1.35054	1.11357	1.31579	1.27225	1.09769	1.47237	0.0104524	Down
112	Eleutheroside E	162.511	741.268	NEG	0.243509	0.336063	0.393585	0.321549	0.25737	0.329542	0.349788	1.40376	0.64442	0.637865	1.11514	0.648906	1.61362	0.0264879	Down
113	(2E)-N-(4-aminobutyl)-3-(4-hydroxy-3-methoxyphenyl)prop-2-enimidic acid	138.708	265.152	POS	0.0333469	0.0353192	0.0313211	0.0367628	0.0320556	0.0410336	0.0472538	0.094743	0.139531	0.121196	0.127349	0.0528382	1.72214	0.0115836	Down
121	L-Tyrosine	43.2178	182.08	POS	0.0150755	0.0126954	0.0153142	0.0152217	0.0136637	0.0150642	0.018963	0.0167155	0.0182506	0.0173533	0.0207714	0.0144994	1.52908	0.00747179	Down
124	D-Proline	24.7509	116.07	POS	0.044584	0.0779251	0.0977864	0.0892206	0.110603	0.053673	0.156983	0.303583	0.221568	0.465993	0.423017	0.044477	1.32284	0.0331821	Down
125	(E)-3-(4-Hydroxyphenyl)-2-propenal	186.639	147.046	NEG	1.60681	1.7386	3.17093	2.02536	1.98343	1.77455	2.92478	2.96619	2.92753	2.69059	4.24739	3.43538	1.59542	0.00580932	Down
126	1-Cyano-2-hydroxy-3-butene	27.2142	98.0593	POS	0.0286859	0.0297123	0.0297895	0.0302686	0.0243879	0.028108	0.0307351	0.0284018	0.0342274	0.0331749	0.0336533	0.0319677	1.36702	0.0180156	Down
131	Hydroxyisocaproic acid	161.882	131.072	NEG	0.403794	0.214413	0.359899	0.281247	0.256222	0.268887	0.428189	0.556675	0.620961	0.401862	0.354178	0.354179	1.4466	0.0161133	Down
132	Methyl isovanillate	144.906	181.051	NEG	1.25578	1.29243	1.40016	1.25406	1.22041	1.34644	1.7081	1.75228	1.42844	1.80476	1.78199	1.52106	1.82843	0.000302063	Down
137	Gaultherin	47.8255	491.142	NEG	0.17088	0.144198	0.230899	0.284759	0.225357	0.126925	0.225965	0.461531	0.300665	0.256795	0.350883	0.287544	1.37957	0.0196012	Down
140	Phenobarbital	175.25	233.09	POS	0.052992	0.0551631	0.0646248	0.0453894	0.056754	0.0560933	0.0258483	0.0352572	0.0277554	0.0378913	0.0238476	0.0392121	1.81666	8.3473e-05	Up
145	Pogostone	203.712	241.109	NEG	0.367268	0.241952	0.485013	0.438377	0.353468	0.26729	1.13082	0.713985	0.626067	1.24454	1.59688	0.799962	1.8175	0.0064598	Down
146	Isovanillin	170.78	151.041	NEG	6.45844	5.59528	6.7619	6.24548	5.58255	5.49381	8.30956	9.17503	7.29533	9.81484	9.61878	8.0011	1.85868	0.000169332	Down
147	LPA(18:1)	344.739	435.255	NEG	0.224276	0.211483	0.250756	0.196054	0.305184	0.337479	0.119323	0.125413	0.160329	0.13376	0.120728	0.124557	1.87352	0.00225824	Up
150	Dihydrojasmonic acid	233.029	211.135	NEG	0.827005	0.774785	1.12103	0.938668	0.721222	0.709123	1.3866	1.44977	1.19921	1.77933	1.83796	1.55336	1.85732	0.000170429	Down
154	PC(9:0/26:4)	350.16	768.547	POS	0.026085	0.0304767	0.01925	0.0147311	0.0228565	0.018114	0.0182263	0.00997647	0.0141017	0.00866163	0.0079986	0.0132841	1.58621	0.00585886	Up
158	Liquiritigenin	223.772	255.068	NEG	0.458283	0.502278	0.673354	0.327284	0.351297	0.501241	0.914985	1.27355	0.903843	1.15207	0.91181	0.457806	1.57175	0.00390058	Down
161	Isosteviol	260.903	317.214	NEG	0.899955	0.971118	0.717389	0.643015	0.875517	0.965003	0.646819	0.582226	0.710637	0.584599	0.595834	0.698363	1.54992	0.00591136	Up
165	Sebacic acid	213.045	201.114	NEG	0.602981	0.521697	0.58299	0.600954	0.538605	0.591126	0.921631	0.772116	0.690171	1.03405	0.893453	0.702935	1.80666	0.00443359	Down
171	2-Oxovaleric acid	42.08	115.041	NEG	0.158091	0.249567	0.197474	0.307591	0.194714	0.223395	0.25835	0.630878	0.41505	0.438548	0.401533	0.23307	1.42589	0.0296112	Down
178	Itaconic acid	45.0588	129.02	NEG	0.373668	0.337277	0.378997	0.338761	0.328549	0.343866	0.406728	0.597973	0.53877	0.493724	0.447601	0.395052	1.65653	0.00892754	Down
180	Glyceraldehyde	24.9488	89.0247	NEG	2.62768	2.67924	2.70121	2.56151	2.45425	2.61595	2.72952	2.98035	3.07057	3.01347	3.08134	2.61214	1.52121	0.00570861	Down
181	Typhaneoside	99.1941	769.236	NEG	0.061979	0.0843921	0.0488043	0.056491	0.0675901	0.0837768	0.0543709	0.0390418	0.0542918	0.0294721	0.0505967	0.0171446	1.3711	0.0117499	Up
185	LPC(18:0)	301.852	582.389	NEG	0.391424	0.398943	0.350371	0.401657	0.33007	0.449499	0.40404	0.512821	0.501663	0.421744	0.444273	0.481645	1.42898	0.0141487	Down
201	N-Acetyl-glucosamine 1-phosphate	29.8872	300.05	NEG	0.258546	0.207926	0.347192	0.281817	0.276582	0.299875	0.0997387	0.197178	0.200046	0.163003	0.168415	0.0823617	1.62986	0.0009908	Up
202	Octadecanedioic acid	261.616	313.239	NEG	5.212	4.60544	5.42609	6.12645	4.77832	5.20493	5.90528	6.49052	5.54811	6.36737	5.74093	7.42407	1.46896	0.0162871	Down
205	Levonordefrin	41.7848	166.085	POS	0.0658939	0.0512219	0.0586829	0.0483301	0.0525763	0.0632675	0.0590855	0.0717492	0.0853447	0.0999054	0.112689	0.0683692	1.49682	0.024113	Down
211	Daidzin	192.548	415.106	NEG	0.400321	0.28386	0.811324	0.371758	0.53148	0.34147	0.794283	0.726665	0.446561	0.724442	0.553493	1.05501	1.28826	0.049197	Down
213	(-)-Syringaresinol	176.602	401.154	POS	0.226329	0.212194	0.244064	0.237955	0.225321	0.204108	0.218592	0.313212	0.253497	0.235661	0.273917	0.272972	1.25181	0.0350833	Down
214	Adenosine monophosphate	34.7056	348.068	POS	0.0108922	0.0156645	0.00766827	0.00832904	0.0104803	0.0168568	0.0022935	0.00983075	0.00575199	0.00592694	0.00633453	0.0054602	1.45357	0.0109407	Up
222	Ganoderic acid G	239.713	531.299	NEG	0.627797	0.598487	0.464428	0.824156	0.725983	0.765114	0.561089	0.164375	0.274148	0.181412	0.165174	0.319465	1.68254	0.000774976	Up
224	Mesalazine	219.744	152.036	NEG	0.644785	0.707237	0.597593	0.504198	0.743909	0.500694	1.15229	0.597723	0.715147	1.13209	1.04814	0.792006	1.38241	0.0197367	Down
225	1,4-D-Gulonolactone	26.7252	195.052	NEG	3.95529	2.96568	4.5392	2.87909	2.20945	2.36921	4.97954	15.415	8.61787	11.3123	10.6815	4.45819	1.6733	0.0145979	Down
227	4,6-Dioxoheptanoic acid	59.4106	157.051	NEG	0.1847	0.172066	0.174317	0.165292	0.176842	0.175301	0.185872	0.126405	0.134294	0.138514	0.114157	0.11515	1.54584	0.0142546	Up
233	20-Hydroxyeicosatetraenoic acid	275.481	319.229	NEG	0.257691	0.263572	0.184302	0.225103	0.248591	0.248947	0.173804	0.218819	0.210086	0.181295	0.163238	0.223472	1.3305	0.0222841	Up
234	Dihydrosinapic acid	27.416	227.09	POS	0.00951887	0.0101274	0.0122967	0.01055	0.00847518	0.0115027	0.0220627	0.0332272	0.0226279	0.0314034	0.0499351	0.0173685	1.84239	0.0102286	Down
236	Ginkgolide J	131.591	441.142	NEG	0.167827	0.225866	0.207781	0.249164	0.175523	0.22419	0.436027	0.510965	0.232823	0.573734	0.567374	0.266589	1.63197	0.0138358	Down
237	4-Hydroxycinnamic acid	181.357	163.041	NEG	0.272877	0.30325	0.400817	0.587472	0.441403	0.399829	0.555619	0.687656	0.478534	0.405811	0.73866	0.59794	1.31737	0.0275737	Down
240	LPC(18:2)	279.437	578.348	NEG	1.05852	1.16622	0.96736	0.981609	1.101	1.41389	1.03562	0.555661	0.916594	0.660201	1.07382	0.659899	1.32591	0.0239213	Up
242	Isoliquiritigenin	223.786	257.078	POS	0.0250064	0.0227615	0.0347452	0.0161966	0.016787	0.0273126	0.0469549	0.0639278	0.0445029	0.0543033	0.0406097	0.0259525	1.59795	0.00390536	Down
245	Coniferyl alcohol	151.929	167.069	POS	0.308954	0.328092	0.330885	0.399128	0.264992	0.361761	0.47068	0.712773	0.471704	0.577196	0.484375	0.481285	1.79233	0.000996625	Down
254	5-Hydroxyindoleacetylglycine	31.3704	249.085	POS	0.0188819	0.0170678	0.0218658	0.0197188	0.017297	0.0173813	0.0268251	0.0252005	0.0186472	0.028564	0.0298304	0.0185153	1.37747	0.0206371	Down
256	6-(alpha-D-Glucosaminyl)-1D-myo-inositol	22.166	342.137	POS	0.0132019	0.00560484	0.0050342	0.00670705	0.00854302	0.0120685	0.0160018	0.0139	0.0122262	0.0135111	0.0192723	0.0143577	1.58226	0.00421446	Down
265	Meconine	149.125	195.064	POS	0.0136517	0.0115542	0.0253692	0.0110744	0.0167604	0.0139325	0.0387194	0.0324428	0.0184044	0.0165189	0.0427861	0.034419	1.49165	0.0113369	Down
266	5'-Deoxyadenosine	50.9436	252.108	POS	0.015176	0.0114599	0.014708	0.0131244	0.0102641	0.0095162	0.016944	0.022736	0.0257024	0.0210305	0.0148613	0.0193811	1.65735	0.00199466	Down
273	Poncirin	131.828	593.176	NEG	0.00928501	0.00495376	0.0146332	0.00997388	0.0078151	0.0062063	0.0121272	0.0295505	0.0194895	0.0297256	0.0283364	0.0108183	1.55443	0.00740395	Down
277	Myo-Inositol	26.0562	179.057	NEG	1.35627	1.09885	1.82744	1.2638	1.16899	1.22197	1.83368	3.13953	2.52938	2.5399	2.16596	1.63394	1.68353	0.00261254	Down
281	3,6-Dimethoxy-4-phenanthrenol	143.95	255.1	POS	0.0423374	0.0489955	0.0469357	0.0492087	0.0435581	0.0523171	0.0556796	0.0530276	0.0489274	0.0548577	0.0590542	0.0520927	1.5091	0.00905415	Down
282	Bilobalide A	146.791	325.095	NEG	0.551543	0.53742	0.67903	0.657677	0.511191	0.541094	0.613855	1.05653	0.753142	0.762209	0.895172	0.743841	1.54023	0.00835508	Down
284	L-Carnitine	23.9945	162.111	POS	0.260712	0.247771	0.19946	0.193577	0.264155	0.269376	0.216443	0.129776	0.180514	0.142077	0.232014	0.168035	1.36168	0.0175252	Up
287	Medicarpin	189.282	315.089	NEG	2.2027	2.23317	1.95198	2.26847	2.29094	2.30819	2.14898	1.71205	1.94772	1.86924	2.01516	1.79782	1.51903	0.00555746	Up
288	Suberic acid	181.358	173.083	NEG	0.525221	0.329561	0.689317	0.547126	0.414794	0.492471	1.12025	0.952871	0.998715	1.04821	0.997431	0.640611	1.77533	0.000279987	Down
291	Pinoresinol 4-O-β-D-glucopyranoside	177.396	519.19	NEG	0.686437	0.730153	0.907557	1.11133	0.709052	0.502093	0.730995	1.41284	0.964285	1.09065	1.13887	1.2706	1.26148	0.0300713	Down
293	Di-2-furanylmethane	151.45	149.059	POS	0.13169	0.129606	0.158469	0.150263	0.119878	0.127655	0.192837	0.252073	0.144287	0.206145	0.183537	0.170163	1.59907	0.00631294	Down
294	PA(18:2/18:3)	351.165	693.455	NEG	0.16087	0.166175	0.202328	0.191499	0.225626	0.238402	0.0570982	0.168855	0.145275	0.137179	0.0358183	0.146297	1.29274	0.0093198	Up
295	2,6-Dimethoxy-4-phenanthrenol	177.726	255.1	POS	0.149694	0.146557	0.16495	0.139498	0.141603	0.14532	0.195594	0.20553	0.157772	0.33394	0.243296	0.176056	1.50957	0.0408243	Down
301	Prostaglandin J2	237.105	333.209	NEG	0.461569	0.760683	0.557952	0.509177	0.6239	1.05725	0.317777	0.305178	0.5014	0.280945	0.425804	0.336892	1.60672	0.0108222	Up
309	Alpha-dimorphecolic acid	276.8	295.229	NEG	55.374	54.6099	67.3658	56.6201	50.3268	59.3139	93.9442	89.5636	78.4111	129.345	153.782	98.3511	1.82063	0.00705846	Down
310	N-acetyl-5-aminosalicylic acid	145.518	194.047	NEG	0.301462	0.43109	0.319421	0.344419	0.326133	0.353445	0.263693	0.270102	0.323276	0.291634	0.236025	0.222982	1.55741	0.00840413	Up
311	8-Epiloganic acid	133.747	375.131	NEG	0.18028	0.132859	0.135487	0.131857	0.0967625	0.104584	0.182994	0.37841	0.262115	0.180283	0.295687	0.219717	1.66419	0.00416616	Down
312	3-(3-Hydroxyphenyl)propanoic acid	152.045	165.057	NEG	2.86822	2.68434	3.74557	3.37507	2.74236	3.03277	5.53131	6.37115	4.08144	8.4044	5.85181	6.68938	1.87164	0.00246299	Down
315	2,3-Dihydroxy-1-(4-hydroxy-3-methoxyphenyl)-1-propanone	80.5576	213.074	POS	0.192838	0.165305	0.204703	0.183682	0.194343	0.160553	0.244013	0.233746	0.194398	0.215222	0.213683	0.197548	1.44159	0.011712	Down
320	3,4,5-Trimethoxybenzoic acid	148.198	211.062	NEG	1.28205	1.31228	1.33666	1.31823	1.31204	1.31464	1.41943	1.67871	1.44683	1.49195	1.49667	1.24913	1.3124	0.0442946	Down
322	Hexadecanedioic acid	270.202	285.209	NEG	1.10038	1.02538	1.07289	0.937856	1.00447	1.0783	1.45761	1.31658	1.11371	1.6351	2.29657	1.39151	1.57781	0.0304689	Down
323	LPC(18:1)	290.069	580.37	NEG	0.132253	0.0577134	0.0593079	0.106551	0.109129	0.183062	0.193994	0.163017	0.138776	0.23493	0.444408	0.189068	1.48131	0.0359342	Down
324	[(2R,3S,4R,5R)-5-(2,4-dioxo-1,2,3,4-tetrahydropyrimidin-1-yl)-3,4-dihydroxyoxolan-2-yl]methyl {[(3R,4S,5S,6R)-3,4,5-trihydroxy-6-(hydroxymethyl)oxan-2-yl phosphonato]oxy}phosphonate	35.9638	565.052	NEG	1.35771	1.4286	1.26747	1.01232	1.39481	1.59966	0.974281	0.931159	1.14134	0.873368	1.42442	0.832163	1.35215	0.0262464	Up
325	Silychristin	166.045	483.125	POS	0.120993	0.191456	0.156049	0.148672	0.130047	0.153436	0.156197	0.365425	0.348698	0.213968	0.330737	0.155591	1.34636	0.0372396	Down
329	L-Uridine	27.6556	243.063	NEG	0.48935	0.335396	0.499813	0.450341	0.437684	0.441325	0.642068	0.51318	0.563656	1.06522	1.19242	0.546146	1.45874	0.049357	Down
333	Diacetone alcohol	218.418	115.077	NEG	0.240436	0.28148	0.242506	0.226227	0.301031	0.251294	0.367352	0.421915	0.399302	0.394642	0.472876	0.336934	1.85696	8.17922e-05	Down
336	13-L-Hydroperoxylinoleic acid	258.241	295.224	POS	0.547726	0.450141	0.606279	0.508956	0.489953	0.563483	0.843681	0.769051	0.656307	0.975165	1.19119	0.88157	1.82225	0.00397195	Down
339	Silydianin	193.228	481.115	NEG	3.65759	3.50877	2.33294	2.79716	2.39895	4.69395	3.03151	6.86405	6.34757	4.93246	7.01424	3.23566	1.25565	0.0341709	Down
349	Tiotidine	35.8593	357.084	NEG	0.128735	0.112268	0.157723	0.135818	0.0880815	0.0739146	0.109726	0.259261	0.193631	0.154344	0.157282	0.159475	1.21759	0.0423088	Down
356	Monooleoylglycerol	346.808	391.255	NEG	0.395838	0.372879	0.527529	0.402975	0.369638	0.560966	0.928227	0.564882	0.667002	0.824213	0.707942	0.788499	1.81505	0.000581361	Down
359	4'-Hydroxyacetophenone	152.045	135.046	NEG	1.51675	1.4156	2.03563	1.90666	1.46284	1.69923	3.14926	3.55453	2.26077	3.13973	3.26929	2.33484	1.83306	0.000326945	Down
361	Entadamide-A-β-D-glucopyranoside	169.529	322.094	NEG	0.160809	0.184124	0.292358	0.191248	0.124921	0.174274	0.287299	0.372165	0.358923	0.514002	0.35871	0.482724	1.79527	0.000562933	Down
363	Phenylacetic acid	163.8	135.046	NEG	0.461061	0.482957	0.515169	0.514873	0.47741	0.565899	0.696921	0.683173	0.578358	0.681831	0.811919	0.541892	1.66803	0.00308281	Down
364	L-Kynurenine	96.9491	191.08	POS	0.00330169	0.00758462	0.00609801	0.00482576	0.00752402	0.00323523	0.00516174	0.0102421	0.00905308	0.00967769	0.00875379	0.00946126	1.29411	0.0128882	Down
365	2,3,9-Trimethoxypterocarpan	130.799	315.121	POS	0.0219881	0.0183213	0.0249486	0.0251462	0.0205799	0.024498	0.0353553	0.0364401	0.02546	0.0301505	0.0491861	0.0224514	1.40568	0.0411006	Down
370	Hydroxyprolyl-Methionine	30.0007	263.1	POS	0.0109854	0.00629025	0.0118234	0.00893317	0.0115329	0.00672139	0.0146066	0.0180169	0.0106654	0.0183477	0.018847	0.0127707	1.53917	0.00474619	Down
375	Lactose	24.3658	365.104	POS	0.107334	0.142218	0.134406	0.104271	0.112419	0.135689	0.190719	0.150465	0.254625	0.163416	0.208438	0.135402	1.52659	0.00940607	Down
377	L-beta-aspartyl-L-serine	151.541	221.079	POS	0.091219	0.0869265	0.0974223	0.0912244	0.0859149	0.0946981	0.107273	0.114207	0.0987551	0.1006	0.111751	0.0952339	1.61084	0.00385716	Down
379	7-Amino-4-methylcoumarin	179.364	174.057	NEG	2.23825	1.76391	2.11055	1.58954	1.34127	1.59655	2.88207	2.57633	3.21696	3.48897	2.15151	3.32747	1.73816	0.000869414	Down
385	(10)-Gingerol	249.66	395.245	NEG	0.389974	0.421344	0.280974	0.417444	0.298321	0.399928	0.26841	0.25832	0.236172	0.290209	0.303989	0.269648	1.53694	0.00507593	Up
387	LDGTS(18:2)	283.473	498.374	POS	0.0885323	0.0785326	0.108028	0.0726151	0.0273597	0.0557032	0.169962	0.0718589	0.105987	0.134203	0.105931	0.154324	1.32204	0.019077	Down
390	Dodecyl gallate	297.351	337.204	NEG	0.197335	0.220574	0.193297	0.26434	0.217864	0.244561	0.161488	0.216709	0.180618	0.14342	0.145214	0.223011	1.28837	0.0334341	Up
392	Batatasin I	147.193	285.11	POS	0.134077	0.1213	0.135978	0.13885	0.128544	0.125703	0.133211	0.151934	0.140962	0.131731	0.148185	0.152951	1.33363	0.0240804	Down
396	Irisolidone	195.999	315.084	POS	0.705992	0.791226	0.735939	0.604046	0.727121	0.807314	0.587222	0.720018	0.401564	0.320483	0.752826	0.484612	1.23963	0.0372318	Up
397	PEtOH(25:0/18:3)	301.979	823.636	NEG	0.068695	0.0654742	0.0593053	0.0625576	0.0441374	0.0794805	0.0780722	0.0915545	0.102617	0.11217	0.122602	0.0836799	1.67645	0.00196214	Down
412	Vanillin acetate	95.0206	195.064	POS	0.0502392	0.0471617	0.0522042	0.0462536	0.047207	0.0463779	0.0651169	0.0579565	0.0535581	0.0576304	0.0562704	0.0500034	1.61427	0.00400082	Down
414	Lactobionic acid	26.7252	357.105	NEG	0.394663	0.393401	0.462387	0.395358	0.344927	0.347175	0.491399	0.665967	0.598935	0.591308	0.670218	0.429782	1.67729	0.00155419	Down
417	1,4,5-Naphthalenetriol	154.498	177.053	POS	0.0613345	0.0616387	0.0645989	0.0651199	0.0580729	0.0631686	0.0716034	0.0937019	0.0731462	0.0753696	0.0924209	0.0756409	1.72706	0.0060012	Down
418	Methyl cinnamate	160.563	163.074	POS	0.272128	0.231133	0.262197	0.288409	0.231387	0.218513	0.274146	0.373867	0.27475	0.337855	0.354457	0.308885	1.54523	0.00640539	Down
420	7-Ketocholesterol	352.841	399.329	NEG	0.38387	0.388484	0.275501	0.412007	0.386532	0.482877	0.271692	0.237097	0.219045	0.379799	0.24962	0.179267	1.49362	0.0068454	Up
423	Stigmasterol	318.641	395.364	POS	0.0990677	0.0953148	0.145984	0.0969569	0.112289	0.097786	0.190151	0.116743	0.116163	0.192073	0.136903	0.174776	1.45169	0.0184077	Down
424	(R)-(E)-4,7-Megastigmadien-9-one	232.855	193.157	POS	0.0611851	0.0836474	0.0485627	0.0716014	0.0752634	0.0695613	0.0411321	0.0435627	0.0437988	0.0433059	0.0391085	0.0412914	1.84836	0.00293217	Up
426	Uridine diphosphate-N-acetylglucosamine	36.3872	606.078	NEG	3.03097	3.14381	2.71253	2.39009	3.12412	3.96551	2.33172	2.15904	2.5598	2.14954	3.11166	1.74475	1.31619	0.0312071	Up
431	Kaempferide	216.487	301.069	POS	0.0715771	0.0870344	0.0822192	0.0810681	0.0976849	0.0950884	0.0784503	0.0729134	0.0393211	0.0434563	0.0864417	0.0660691	1.21008	0.0348053	Up
432	Adipic acid	90.649	145.052	NEG	0.0861914	0.0909712	0.114298	0.119601	0.0920961	0.104218	0.128236	0.115487	0.109729	0.131283	0.133044	0.100326	1.26855	0.0388647	Down
433	Nootkatone	266.818	219.173	POS	0.0434916	0.0380416	0.0424617	0.0369705	0.0371611	0.0406962	0.0506996	0.0535164	0.0495054	0.0667053	0.0672017	0.0624789	1.8587	0.00162346	Down
434	Glucovanillin	135.461	373.116	NEG	0.143846	0.0967035	0.181979	0.138422	0.128127	0.11558	0.173772	0.254035	0.164066	0.21144	0.219189	0.152835	1.48578	0.0107312	Down
436	Tyrosyl-Aspartate	225.834	297.11	POS	0.0290675	0.040601	0.0416104	0.0419381	0.0300847	0.0493069	0.0635438	0.0705116	0.0428646	0.0522919	0.0740075	0.0334671	1.2271	0.0383249	Down
437	Rosarin	184.646	427.163	NEG	0.18941	0.142547	0.205295	0.0427818	0.183805	0.205129	0.295236	0.510792	0.227547	0.47982	0.261939	0.361698	1.45079	0.0048786	Down
441	Aristolone	304.759	219.173	POS	0.0555673	0.0625955	0.0614226	0.0667896	0.0651536	0.064547	0.0572095	0.0550877	0.0598237	0.0472169	0.046935	0.0615962	1.32484	0.0242003	Up
446	1-Nitronaphthalene-5,6-oxide	182.795	190.049	POS	0.105413	0.131294	0.107282	0.114628	0.11438	0.117436	0.100605	0.086559	0.105441	0.0925921	0.0908456	0.110291	1.51014	0.00851172	Up
456	Anemosapogenin	319.877	517.355	NEG	0.213114	0.16544	0.176674	0.167317	0.134347	0.194538	0.216834	0.167878	0.227836	0.337994	0.381859	0.308051	1.45189	0.0312487	Down
457	Diferuloylputrescine	195.157	441.199	POS	0.230877	0.285005	0.26322	0.139786	0.177581	0.212285	0.299929	0.401786	1.06654	1.31257	1.03063	0.307703	1.53892	0.0368275	Down
462	Xanthurenic acid	191.964	204.031	NEG	1.12686	1.42988	1.28275	1.17852	1.23337	1.30989	1.19018	1.09056	1.22173	1.10041	0.903086	1.12728	1.27429	0.0341058	Up
475	Sterol	277.403	249.219	POS	0.0156054	0.0171268	0.0228761	0.0166	0.0154525	0.0205786	0.0343635	0.0308306	0.0241418	0.0454179	0.0524628	0.0362905	1.81941	0.00470283	Down
486	Acetoacetic acid	25.6858	85.0277	POS	0.1323	0.130576	0.144575	0.12713	0.122551	0.133668	0.144664	0.168987	0.21229	0.180135	0.162923	0.12982	1.40975	0.0305988	Down
488	(10E,12Z)-(9S)-9-Hydroperoxyoctadeca-10,12-dienoic acid	258.789	311.225	NEG	28.7983	24.9867	37.3479	28.7204	27.7595	28.7229	61.3477	51.383	43.702	54.2689	113.252	58.0298	1.77318	0.0196457	Down
490	Vulgaxanthin II	221.785	341.099	POS	0.0431352	0.0478997	0.0313111	0.030963	0.0391204	0.0464719	0.0200706	0.020145	0.022236	0.015177	0.0362729	0.0151884	1.67963	0.0018791	Up
491	Episyringaresinol 4'-O-β-D-glncopyranoside	174.587	598.245	POS	0.0289311	0.0521067	0.0538587	0.05025	0.0411641	0.0627176	0.0491194	0.124872	0.083911	0.0486348	0.112651	0.0821986	1.30013	0.0396766	Down
493	Rupestonic acid	221.338	249.147	POS	0.00403005	0.00745581	0.0128278	0.0103215	0.00798851	0.00830812	0.0151942	0.0112357	0.0111727	0.0133955	0.0173496	0.0151709	1.45341	0.00599793	Down
496	Glycyl-L-tyrosine	28.7863	221.091	POS	0.19367	0.164412	0.195173	0.210281	0.145549	0.152478	0.233742	0.335108	0.244303	0.369456	0.320584	0.265422	1.78183	0.000780927	Down
497	5-(3',4',5'-Trihydroxyphenyl)-gamma-valerolactone	141.379	225.074	POS	0.0309136	0.032036	0.0383342	0.0340904	0.0302764	0.031428	0.0400228	0.0583303	0.0414581	0.0429816	0.0596594	0.0387287	1.60508	0.0138266	Down
499	9-OxoODE	298.024	293.214	NEG	1.09705	1.12073	1.30581	1.10137	1.11067	1.10264	1.42158	1.40458	1.18153	1.57998	1.70905	1.46284	1.67621	0.00250655	Down
500	Ureidopropionic acid	162.596	133.064	POS	0.0893611	0.0843031	0.0863617	0.086036	0.0787865	0.0826732	0.104557	0.107895	0.0878169	0.0986648	0.135455	0.0998434	1.55274	0.0226423	Down
503	D-Biotin	153.884	227.089	POS	0.228452	0.134971	0.211373	0.141952	0.187855	0.159358	0.211665	0.384478	0.253069	0.317555	0.276492	0.539152	1.58852	0.0231516	Down
509	Androsin	50.7876	387.131	NEG	0.021024	0.0167007	0.0195274	0.0256438	0.0169867	0.037096	0.0819369	0.060137	0.0298498	0.085357	0.0969886	0.0478858	1.7754	0.00684796	Down
512	gamma-Glutamylmethionine	44.5174	277.085	NEG	2.06355	2.29294	3.21656	2.09217	1.60135	1.70282	3.27769	5.45622	4.80648	2.23184	2.68021	3.35457	1.3666	0.0253751	Down
516	2'-Hydroxy-3,4',5',7,8-pentamethoxyflavone	169.189	389.121	POS	0.130564	0.159151	0.114161	0.204007	0.149786	0.144807	0.113876	0.0903598	0.11065	0.100743	0.075581	0.0939524	1.6669	0.00325439	Up
519	Palmitic acid	320.571	255.234	NEG	62.8688	66.7357	66.9344	61.1861	63.1264	60.8636	89.2014	85.0428	75.6326	82.605	98.4468	77.6514	1.87022	0.00101846	Down
521	Stearidonic acid	276.721	277.214	POS	1.20268	1.14453	1.42529	1.23171	1.1531	1.29473	2.04838	1.7997	1.656	2.48447	3.21288	2.24202	1.82588	0.00675425	Down
523	Maltose monohydrate	25.2657	360.147	POS	0.0937367	0.125522	0.110385	0.103492	0.0996839	0.121607	0.143904	0.1043	0.138647	0.125577	0.151689	0.120729	1.27974	0.0319409	Down
534	7beta-Hydroxylathyrol	227.794	351.213	POS	0.0575846	0.0535125	0.0655159	0.0663845	0.0608814	0.0573627	0.0903958	0.073244	0.0709144	0.0931503	0.106213	0.0879666	1.78676	0.000906161	Down
538	LPI(18:2)	329.133	595.293	NEG	0.163213	0.154306	0.12544	0.169143	0.204283	0.274104	0.101999	0.0520441	0.152067	0.0778628	0.122486	0.0788219	1.51942	0.00842434	Up
540	3,4',5-Biphenyltriol	137.195	203.069	POS	0.0608405	0.0457575	0.0579157	0.0595892	0.059028	0.0587863	0.063912	0.0755256	0.0614275	0.0611433	0.0779596	0.062979	1.34646	0.0240268	Down
543	Propylgallate	95.2237	211.062	NEG	3.52409	3.05775	3.67859	3.32089	3.15936	3.0345	4.7126	4.55469	3.8143	4.70388	4.27946	3.59213	1.71268	0.00129208	Down
547	2,3-Dihydroxy-4-methoxyacetophenone	94.4769	181.051	NEG	2.04635	1.76337	2.16172	2.00417	1.9778	1.78408	2.52546	2.74898	2.16579	2.67104	2.23654	2.16805	1.60702	0.0039546	Down
550	(+)-Isolariciresinol	190.579	359.152	NEG	6.26548	5.95756	6.67747	6.96168	6.50724	4.9312	3.84835	5.82577	5.33783	5.55688	4.4218	5.50242	1.31525	0.0248484	Up
552	Moracin B	181.893	287.089	POS	0.116697	0.168697	0.118638	0.175526	0.100597	0.13947	0.143248	0.235652	0.251042	0.198576	0.23345	0.133845	1.28568	0.0255318	Down
554	Campesterol	271.447	383.36	POS	0.023875	0.0190288	0.0107502	0.0179158	0.0131571	0.0184248	0.00861381	0.0173336	0.00563974	0.00703053	0.0119385	0.00923436	1.39446	0.0178725	Up
555	Carboprost (tromethamine)	265.507	351.251	POS	0.0604669	0.0668197	0.0809874	0.109823	0.0677606	0.0728859	0.130352	0.0965731	0.116793	0.19009	0.297452	0.160652	1.63327	0.0292589	Down
561	1,3-Dimethyluric acid	217.803	197.069	POS	0.0202147	0.0192025	0.0225257	0.021067	0.0184394	0.0187641	0.0356402	0.0372252	0.0242559	0.0389251	0.0306251	0.0295295	1.85939	0.00188601	Down
572	Perillyl acetate	258.247	195.137	POS	0.0818222	0.0745541	0.102016	0.0832727	0.0823709	0.0837459	0.156531	0.149666	0.104103	0.162872	0.194128	0.158851	1.87677	0.00139041	Down
574	PA(21:0/12:0)	335.499	663.478	POS	0.00141478	0.0020482	0.00139635	0.00395816	0.00202562	0.00335717	0.000606705	0.00116924	0.000948259	0.00106009	0.0018306	0.00114801	1.44596	0.0228107	Up
584	phenethanolamine	41.7848	120.08	POS	0.0529167	0.0418292	0.0450121	0.0359002	0.0404802	0.050824	0.0424484	0.0568791	0.0687997	0.0817966	0.096033	0.052307	1.36275	0.0426656	Down
586	Tropone	143.664	107.048	POS	0.0504392	0.0654734	0.0644663	0.0631849	0.0502875	0.0740041	0.0857758	0.0878181	0.0702702	0.0764948	0.0911581	0.0708107	1.562	0.00482242	Down
589	Aloesol	192.542	235.094	POS	0.150418	0.135668	0.171813	0.135063	0.146537	0.147072	0.151748	0.176677	0.155404	0.161229	0.180425	0.163925	1.27002	0.0384302	Down
592	4'-O-methyl-(-)-epicatechin-3'-O-beta-glucuronide	151.427	495.148	POS	0.0921191	0.099651	0.122921	0.0804421	0.0911285	0.097404	0.237161	0.383315	0.216486	0.285403	0.217875	0.212391	1.94811	0.00161206	Down
596	Dehydroxyzyleuton	137.086	221.079	POS	0.0884837	0.067187	0.0895664	0.0799695	0.0792344	0.0749799	0.0836936	0.100852	0.0795855	0.0902494	0.112777	0.0944566	1.24081	0.0455622	Down
602	4-Nitrocatechol	179.404	154.015	NEG	0.37464	0.443472	0.312858	0.350323	0.469961	0.483469	0.382855	0.234095	0.201163	0.344041	0.240766	0.336419	1.3228	0.0187901	Up
604	Paeoniflorin	145.292	463.156	POS	0.0242593	0.0247711	0.0286872	0.0272768	0.0278149	0.0260869	0.029328	0.0334885	0.0379989	0.0272109	0.0404788	0.0275702	1.30904	0.0416829	Down
618	alpha-Linolenic acid	301.988	277.218	NEG	28.3303	26.7649	25.8321	24.7004	25.4166	29.6306	27.9235	27.6201	33.0771	35.4751	35.3684	29.2084	1.41249	0.0191333	Down
619	Quinceoxepine	275.413	179.141	POS	0.113313	0.114393	0.134309	0.120822	0.114069	0.128853	0.193587	0.173142	0.163935	0.248348	0.312117	0.214691	1.82322	0.00743264	Down
620	Pollenitin	45.502	317.063	POS	0.012522	0.00976252	0.00627829	0.00807455	0.0125066	0.0148908	0.0149448	0.0264262	0.0168106	0.0122825	0.0210456	0.0183162	1.48554	0.0101178	Down
622	Methyl (2E,6Z)-dodecadienoate	233.106	211.168	POS	0.029477	0.0422096	0.0176039	0.0325001	0.0365357	0.0288077	0.0112679	0.0146346	0.0151324	0.017378	0.0118625	0.0111311	1.8325	0.00261757	Up
628	Thermophillin	143.451	169.048	POS	0.0412292	0.0493486	0.0700734	0.0563717	0.0513277	0.0433279	0.0681213	0.0954263	0.065209	0.0595269	0.0753922	0.0659571	1.43188	0.015223	Down
631	Alantolactone	220.456	233.152	POS	0.0543772	0.0381599	0.0470114	0.0414456	0.0516219	0.0487096	0.0575604	0.0520031	0.0497754	0.0629789	0.0732075	0.0554588	1.40593	0.0221072	Down
633	N2,N2-Dimethylguanosine	47.9482	312.127	POS	0.0028547	0.00262495	0.00303337	0.00282609	0.00230937	0.00254676	0.00288693	0.00552002	0.00440333	0.00427768	0.00363426	0.00374768	1.62631	0.0112367	Down
636	p-Hydroxynonanophenone	250.983	235.168	POS	0.0385429	0.0344923	0.0377437	0.0397339	0.0315645	0.0333402	0.0532449	0.0452805	0.0428025	0.0567969	0.0615999	0.047759	1.79394	0.000783829	Down
642	3',5'-Dimethoxy-4'-hydroxyacetophenone	157.863	195.067	NEG	4.41552	3.84959	4.6668	4.14658	4.32128	3.82986	5.13379	5.29962	4.74117	5.06966	5.33107	4.88179	1.76438	0.00034617	Down
646	1-(2,6,6-Trimethyl-2-cyclohexen-1-yl)-1,6-heptadien-3-one	232.423	233.188	POS	0.041159	0.0517199	0.0260142	0.0303187	0.0478066	0.0424582	0.0215879	0.0178919	0.0217541	0.0274652	0.0228015	0.0177628	1.72845	0.00483294	Up
647	Withanolide A	237.736	488.296	POS	0.032957	0.0244139	0.0179873	0.0211097	0.0262749	0.02691	0.0149712	0.0237406	0.0192668	0.0144634	0.0178695	0.0152551	1.44464	0.0165425	Up
650	8-iso-PGA1	262.928	335.225	NEG	0.226304	0.246831	0.45208	0.230307	0.243425	0.256728	0.496289	0.509069	0.531264	0.486795	0.558072	0.253807	1.49183	0.00643691	Down
653	2-Furoic acid	32.9466	111.009	NEG	1.18569	0.589099	1.25288	1.07668	1.19549	0.829883	1.00276	1.82607	2.55135	1.75274	2.21843	0.946523	1.2147	0.0339614	Down
654	Olivetol	231.086	179.108	NEG	0.120015	0.124239	0.149376	0.141319	0.136138	0.102007	0.216554	0.18934	0.161063	0.206079	0.251846	0.184601	1.77932	0.000522749	Down
655	Taxifolin 7-O-β-D-glucoside	176.759	465.105	NEG	0.520485	0.690499	0.518453	0.554854	0.711228	0.728567	0.687624	1.13563	0.996519	0.802742	0.728706	0.773365	1.40632	0.0173424	Down
662	6-(3-Hexenyl)tetrahydro-2H-pyran-2-one	184.574	183.137	POS	0.0552046	0.0606872	0.0520835	0.0741486	0.058099	0.0524603	0.0411325	0.0331832	0.0424581	0.0324452	0.0391776	0.0209467	1.72532	0.000457537	Up
671	Quinic acid	26.3258	191.057	NEG	5.04538	3.64148	6.50646	3.93645	3.58706	4.11012	6.41464	13.034	7.78681	7.14108	6.18949	6.06025	1.54348	0.0188535	Down
675	10-Deacetylbaccatin III	159.405	527.229	POS	0.0373216	0.0354537	0.0315379	0.0301914	0.0299572	0.0298021	0.0515243	0.0483406	0.0515076	0.0318585	0.0521397	0.0643187	1.63058	0.00781279	Down
681	Nandrolone	249.68	275.198	POS	0.28531	0.237634	0.347733	0.25727	0.289958	0.282144	0.539774	0.454596	0.387357	0.653377	0.850934	0.526796	1.81262	0.00725867	Down
687	D-Xylulose	26.0562	149.046	NEG	0.739306	0.612387	0.905833	0.593941	0.574675	0.623709	0.955837	1.62141	1.11877	1.24993	0.959498	0.881896	1.67261	0.00414669	Down
688	JNJ-37822681 (dihydrochloride)	142.667	431.158	NEG	1.81434	1.57785	2.15148	2.34077	1.76893	1.62262	2.20264	3.71803	2.18042	3.11536	2.22581	2.14939	1.3441	0.0361338	Down
689	Palmitoylglycine	222.444	296.256	POS	0.0392498	0.0372342	0.0361885	0.0375036	0.0363129	0.0442293	0.0595907	0.0364566	0.0504133	0.045463	0.0483191	0.0507055	1.48618	0.0129422	Down
691	N-Malonyltryptophan	179.788	291.096	POS	0.0560228	0.0983907	0.113049	0.0920076	0.0399234	0.0716112	0.135682	0.185638	0.155754	0.0586811	0.107962	0.117732	1.12506	0.0441246	Down
695	Alpha-Hydroxyisobutyric acid	41.7754	103.041	NEG	0.0983378	0.197343	0.0925263	0.212183	0.194234	0.122269	0.482114	0.260752	0.091943	0.327902	0.311015	0.453804	1.26008	0.0213642	Down
699	Glyceric acid	26.8806	105.02	NEG	0.393453	0.333938	0.536583	0.3475	0.362178	0.354252	0.589277	0.907282	0.611463	0.796512	0.72258	0.478413	1.71996	0.00181638	Down
700	Levoglucosan	25.6224	161.046	NEG	0.796364	0.776492	0.969324	0.792968	0.716027	0.884028	1.06169	1.78462	1.32577	1.30406	1.18547	0.915956	1.62048	0.0137753	Down
702	Isobutyrylglycine	24.9488	144.067	NEG	0.700811	0.972374	0.878711	0.617517	0.544763	0.548668	1.27062	1.98996	1.36338	2.22483	1.79299	0.69733	1.56471	0.0120566	Down
705	Dimethylstrobochrysin	148.445	297.11	POS	0.0327382	0.0339716	0.0367695	0.0382423	0.0337668	0.037195	0.0403486	0.0419146	0.0355585	0.0368755	0.0473744	0.0423898	1.38862	0.0221223	Down
713	Platycodigenin	269.483	503.332	POS	0.249015	0.277867	0.238844	0.280146	0.289572	0.262857	0.222598	0.199929	0.228031	0.201383	0.183629	0.131291	1.6162	0.00134853	Up
720	6-Methylcoumarin	190.567	161.058	POS	0.230634	0.243451	0.248028	0.234277	0.226311	0.221033	0.247103	0.261019	0.238051	0.261749	0.259282	0.240269	1.36979	0.0173599	Down
742	Tetramethylsilane	178.55	301.141	POS	0.397043	0.451086	0.476995	0.493976	0.399401	0.496912	0.618181	0.690784	0.435902	0.56013	0.781468	0.503653	1.38198	0.0355511	Down
743	Cytarabine	77.4769	242.076	NEG	0.0382966	0.0504359	0.0247947	0.032539	0.0396607	0.03269	0.0197679	0.0267671	0.00753486	0.0189975	0.00951465	0.0186363	1.58439	0.0016551	Up
748	Prostaglandin D2	221.773	351.219	NEG	0.62853	0.544067	0.473392	0.519905	0.567326	0.5436	0.362155	0.307618	0.395966	0.365103	0.322897	0.380791	1.91903	1.9136e-05	Up
758	Cyclogalegenin	226.432	491.371	POS	0.168992	0.137078	0.119047	0.107422	0.174186	0.110534	0.0915964	0.0841345	0.093792	0.0683432	0.0961776	0.062218	1.71277	0.00243601	Up
762	Sesamolin	217.84	371.11	POS	0.153431	0.136404	0.0752383	0.085462	0.110539	0.107786	0.0389475	0.0424142	0.0483971	0.0354591	0.0751282	0.0515887	1.79762	0.000865987	Up
767	Demethylated antipyrine	29.3063	175.085	POS	0.0523984	0.0496409	0.0588757	0.0633802	0.0415406	0.0412439	0.0704561	0.105896	0.0678562	0.11739	0.0891403	0.0796179	1.72634	0.00187227	Down
768	p-Hydroxyphenethyl trans-ferulate	144.487	315.121	POS	0.0601049	0.0619927	0.0742259	0.0684507	0.0619561	0.0582086	0.0598406	0.0976486	0.0681434	0.0732303	0.0911165	0.0806728	1.19678	0.0470833	Down
769	Vasicinone	206.54	185.07	POS	0.15765	0.164793	0.177795	0.149676	0.144744	0.155374	0.18218	0.182335	0.167608	0.186537	0.181881	0.175695	1.59857	0.00344276	Down
776	3,4,5-Trimethoxycinnamic acid	153.771	297.1	NEG	0.401561	0.528789	0.561052	0.645939	0.525586	0.548831	0.925115	1.04283	0.939822	0.768382	1.11766	0.741647	1.81569	0.000209465	Down
779	Sinensetin	192.578	371.115	NEG	6.01757	6.85122	6.71127	7.02253	7.19226	6.73494	6.06043	4.90181	6.26021	6.52152	6.6512	5.23859	1.25187	0.0347126	Up
784	L-Valine	24.8624	118.085	POS	1.61714	1.6954	1.68138	1.36464	1.70697	1.65134	1.32889	1.34358	1.37467	1.10394	1.34622	1.03754	1.70203	0.00101278	Up
788	Estriol	222.308	289.178	POS	0.0468695	0.0333731	0.0518204	0.0393915	0.0512731	0.0440422	0.0958448	0.0708622	0.0622329	0.110039	0.154467	0.0814393	1.76233	0.0122959	Down
791	5,7-Dihydroxy-3',4'-dimethoxy-8-(3-hydroxy-3-methylbutyl)-isoflavone 7-glucoside	162.119	563.207	POS	0.0230815	0.0179905	0.0211351	0.0264661	0.0190509	0.0126232	0.0326846	0.0425861	0.0329241	0.0430221	0.036557	0.0629507	1.76607	0.00145784	Down
793	(-)-1-(Methylthio)propyl 1-propenyl disulfide	32.842	195.031	POS	0.0462503	0.0456031	0.0665315	0.0487848	0.0290479	0.0316117	0.0182244	0.0214505	0.0371864	0.0227472	0.0228186	0.0221576	1.62364	0.00745679	Up
794	Rutacultin	27.9625	275.121	POS	0.0542733	0.0334447	0.0917168	0.0557389	0.0466073	0.0635003	0.0781585	0.12318	0.103769	0.0724126	0.101423	0.0666422	1.39448	0.0194753	Down
801	Jasmonic acid	225.11	209.119	NEG	0.223755	0.189176	0.293315	0.211504	0.208683	0.214596	0.526017	0.412031	0.389016	0.655689	0.835751	0.532978	1.8997	0.00376192	Down
809	2'-Hydroxy-4'-methylacetophenone	199.159	149.062	NEG	0.359501	0.356872	0.603	0.525858	0.346775	0.375422	0.632711	0.894212	0.499415	0.551659	0.669794	0.580542	1.47576	0.0154415	Down
814	Tuberostemonine	239.682	376.257	POS	0.0744416	0.0366306	0.0527812	0.0341884	0.0442862	0.0401271	0.0840417	0.129328	0.0759486	0.0906348	0.0732215	0.0649874	1.63865	0.00546811	Down
816	Kinsenoside	27.9553	323.1	NEG	0.132856	0.112046	0.188396	0.196958	0.127758	0.140579	0.242602	0.240751	0.20483	0.321605	0.22732	0.236283	1.73728	0.00123077	Down
820	3,4-Dimethoxyphenylacetic acid	27.9625	197.079	POS	0.0133136	0.0123165	0.0156611	0.0144666	0.0136373	0.0121854	0.0192133	0.0215515	0.01811	0.0291064	0.0427576	0.0194315	1.63133	0.0321627	Down
822	Chorismate	55.4623	225.042	NEG	0.276288	0.292249	0.334938	0.242705	0.276442	0.325287	0.347376	0.414281	0.370227	0.384597	0.449663	0.238619	1.14768	0.04227	Down
826	Azadirachtin B	160.313	707.258	NEG	0.169104	0.0901602	0.144643	0.190083	0.103268	0.0637219	0.314017	0.402151	0.237072	0.393245	0.426621	0.41611	1.82155	6.41772e-05	Down
827	2,3-Dinor-6-keto-prostaglandin F1 a	266.853	309.203	POS	0.0127587	0.00934572	0.0200366	0.0102461	0.0146679	0.0132203	0.0330049	0.0211338	0.0174272	0.0345724	0.0513716	0.0267217	1.67692	0.0155359	Down
833	Methyl bisnorbiotinyl ketone	154.76	215.08	POS	0.608157	0.606384	0.729995	0.676448	0.556307	0.562529	0.734888	0.865055	0.64425	0.911267	0.693632	0.674206	1.32476	0.0318985	Down
836	S-[1-[2-(Acetyloxy)ethyl]butyl] ethanethioate	173.661	219.1	POS	0.229698	0.231221	0.551139	0.677576	0.237743	0.490657	0.481231	0.738845	0.574786	0.541107	0.715492	0.90271	1.33127	0.0311895	Down
837	Forsythoside E	161.972	463.172	POS	0.111351	0.11169	0.114399	0.119863	0.11167	0.119441	0.124315	0.140471	0.126751	0.124181	0.142439	0.125277	1.67821	0.00202894	Down
838	Pinoresinol Diglucoside	187.075	683.243	POS	0.206071	0.194323	0.202564	0.196735	0.191096	0.219456	0.217941	0.200441	0.221641	0.216557	0.207558	0.228045	1.30265	0.0410793	Down
842	Elenaic acid	136.89	243.084	POS	0.0853531	0.0728504	0.120476	0.0879345	0.0824692	0.0816956	0.124598	0.189744	0.132345	0.137643	0.195267	0.105259	1.63482	0.00484927	Down
847	L-Fucose	24.2826	163.062	NEG	1.37063	1.55799	1.13697	1.31545	1.38756	1.54737	1.2257	0.597059	0.903691	0.802534	1.26169	1.2323	1.31639	0.0147759	Up
848	3,4',5-Trihydroxy-3',7-dimethoxyflavanone	181.882	333.094	POS	2.12736	2.88745	2.21145	2.06429	1.93806	2.60515	2.50585	4.90924	4.79475	3.50841	3.81339	2.38183	1.40877	0.0271708	Down
851	5-O-Methylembelin	241.758	309.203	POS	0.0566717	0.0508641	0.0747749	0.0607809	0.0614135	0.0621728	0.134856	0.0969961	0.0865071	0.149605	0.199024	0.119458	1.82109	0.00770247	Down
853	1,2,3,4,Tetrahydro-1,5,7-trimethylnapthalene	232.657	175.147	POS	0.0745064	0.0894136	0.0598063	0.0713839	0.0792314	0.0804922	0.0597639	0.0548527	0.0606468	0.0597765	0.0630565	0.0579363	1.64672	0.00862009	Up
859	17alpha-Hydroxyprogesterone	239.717	331.225	POS	0.0341357	0.0306345	0.014029	0.0273179	0.0303071	0.0302772	0.00992254	0.00957854	0.016226	0.0317968	0.0197738	0.0121649	1.27267	0.0317124	Up
862	Methyl 2-(2-methoxy-4-hydroxyphenyl)-6-methoxy-3-benzofurancarboxylate	165.913	329.099	POS	0.14804	0.133396	0.124923	0.138619	0.148437	0.152987	0.136817	0.114544	0.122138	0.122554	0.117003	0.132912	1.37805	0.0142156	Up
863	Bay K 8644	207.22	355.084	NEG	1.5014	1.50752	1.34961	1.50375	1.48331	1.62714	1.44803	1.46837	1.29136	1.29259	1.46604	1.17906	1.19034	0.047403	Up
866	Pterostilbene	178.543	257.115	POS	0.191421	0.207788	0.201517	0.215434	0.18412	0.223955	0.264836	0.290746	0.200848	0.253664	0.341176	0.209753	1.34674	0.0457654	Down
868	Phthalide	193.031	205.084	POS	0.101789	0.0907658	0.113968	0.093516	0.0911188	0.106257	0.113167	0.125004	0.170953	0.115394	0.140388	0.110655	1.46641	0.0155291	Down
870	Xylobiose	27.4204	281.089	NEG	0.725028	0.620028	0.932682	0.789996	0.562611	0.514706	0.835846	1.16474	1.00603	0.927381	1.0982	0.890273	1.52917	0.00477018	Down
876	25-Hydroxyvitamin D2	300.502	413.339	POS	0.0545697	0.0461151	0.0465095	0.0414804	0.0522268	0.0487904	0.0533225	0.034112	0.0367598	0.029645	0.0393659	0.0356336	1.36556	0.0241382	Up
878	3-(3,4-Dihydroxy-5-methoxy)-2-propenoic acid	160.954	209.047	NEG	0.765738	0.820579	0.90115	0.901131	0.807488	0.924996	1.1183	1.1774	0.888858	1.09604	1.00873	0.812006	1.31389	0.0279254	Down
881	N-(2-Hydroxypropyl)methacrylamide	25.6975	144.101	POS	2.75971	2.33725	2.05869	1.98538	2.3023	2.5291	1.78259	1.30344	1.80947	1.3096	2.3535	1.56255	1.48049	0.00914895	Up
883	1-Pyrenebutyric acid	163.901	289.116	POS	0.0207515	0.0135764	0.0238359	0.0130986	0.0192295	0.0140095	0.0314891	0.0372253	0.0371163	0.0355694	0.0374016	0.0257491	1.80417	8.72422e-05	Down
886	5-Hydroxy-N-formylkynurenine	27.9963	253.08	POS	0.0270747	0.0241047	0.0315176	0.0295254	0.0257015	0.0253333	0.0376678	0.0457702	0.0330167	0.0447996	0.027405	0.0357901	1.54467	0.00796898	Down
887	6-Angeloylfuranofukinol	250.273	333.201	POS	0.0671371	0.0582833	0.108211	0.0637753	0.070632	0.062709	0.163436	0.127205	0.106673	0.225665	0.290713	0.146141	1.75862	0.0125045	Down
888	Cysteinyl-Proline	29.7883	219.075	POS	0.00791059	0.00953001	0.0101579	0.00839112	0.00839165	0.00721789	0.0098429	0.0142306	0.0114705	0.00935354	0.012273	0.0107002	1.46111	0.00955515	Down
890	Picroside I	161.042	551.179	NEG	1.03639	0.773086	0.90595	1.12056	0.859925	0.755018	1.135	1.2757	0.924914	1.28526	1.67478	1.01149	1.3492	0.0311724	Down
892	Glyzarin	195.829	295.095	POS	0.091631	0.0886318	0.105256	0.0902235	0.0884293	0.118196	0.15242	0.132203	0.0911782	0.127903	0.15161	0.0983373	1.30147	0.0348838	Down
893	Dehydrovomifoliol	248.988	223.131	POS	0.00235564	0.00170463	0.0096136	0.00111887	0.00220703	0.00331027	0.0175405	0.0155664	0.00845082	0.0173784	0.0250183	0.0165084	1.8112	0.000336161	Down
894	Helicin	46.8114	329.089	NEG	7.10989	5.91515	7.47433	7.797	5.64795	5.47163	7.65431	14.6915	9.42866	11.1363	10.2782	9.56337	1.65122	0.00414101	Down
898	Allantoin	25.4325	157.037	NEG	0.427342	0.479631	0.387588	0.329454	0.511363	0.542789	0.29986	0.13232	0.265416	0.189287	0.303293	0.235271	1.67378	0.000624614	Up
908	Harpagoside	159.665	512.21	POS	0.0457397	0.0552427	0.0667455	0.0677032	0.0519569	0.0423959	0.0517067	0.0886453	0.0604823	0.071425	0.076651	0.0821509	1.21637	0.0381273	Down
912	Allixin	189.987	227.126	POS	0.0359893	0.0422927	0.0510468	0.0255673	0.0176225	0.0139287	0.0581867	0.0750327	0.0607562	0.0677502	0.0751939	0.0463741	1.54215	0.00134129	Down
914	4,8,12,15-Octadecatetraenoic acid	258.237	277.214	POS	0.522182	0.461732	0.654989	0.512599	0.501465	0.532261	1.03271	0.861641	0.708994	1.24648	1.70991	0.983086	1.79144	0.0108525	Down
Blue represents down-regulated expression, red represents up-regulated expression.

## Sheet: Table S4
Table S4 The enrichment analysis of differentially abuntant metabolites
Pathway	Description	Compounds.(all)	Compounds.(dem)	Rich factor	P value
gmx01100	Metabolic pathways	109	38	0.0124672	0.000847339
gmx01110	Biosynthesis of secondary metabolites	62	14	0.00619743	0.985289
gmx01240	Biosynthesis of cofactors	15	5	0.0152439	0.177525
gmx02010	ABC transporters	13	5	0.0362319	0.00798211
gmx00350	Tyrosine metabolism	11	4	0.0512821	0.00530768
gmx00360	Phenylalanine metabolism	9	4	0.0816327	0.000955743
gmx00380	Tryptophan metabolism	7	4	0.0481928	0.00661507
gmx00940	Phenylpropanoid biosynthesis	10	4	0.0689655	0.00180267
gmx01200	Carbon metabolism	10	3	0.0263158	0.0851275
gmx01230	Biosynthesis of amino acids	16	3	0.0234375	0.110839
gmx00630	Glyoxylate and dicarboxylate metabolism	9	3	0.046875	0.0201624
gmx00591	Linoleic acid metabolism	5	3	0.107143	0.00199203
gmx00310	Lysine degradation	6	3	0.0535714	0.0141096
gmx00130	Ubiquinone and other terpenoid-quinone biosynthesis	4	3	0.0422535	0.0264658
gmx00999	Biosynthesis of various plant secondary metabolites	6	3	0.0201342	0.154216
gmx01210	2-Oxocarboxylic acid metabolism	13	2	0.0149254	0.347684
gmx01232	Nucleotide metabolism	5	2	0.0344828	0.0978805
gmx01250	Biosynthesis of nucleotide sugars	2	2	0.01	0.551509
gmx00020	Citrate cycle (TCA cycle)	5	2	0.1	0.0139777
gmx00051	Fructose and mannose metabolism	2	2	0.0363636	0.0894348
gmx00520	Amino sugar and nucleotide sugar metabolism	2	2	0.0169492	0.293476
gmx00620	Pyruvate metabolism	4	2	0.0625	0.0340526
gmx00650	Butanoate metabolism	5	2	0.0425532	0.0681234
gmx00920	Sulfur metabolism	2	2	0.0606061	0.0360423
gmx00071	Fatty acid degradation	2	2	0.04	0.0758945
gmx00073	Cutin, suberine and wax biosynthesis	3	2	0.0740741	0.0248002
gmx00100	Steroid biosynthesis	6	2	0.0350877	0.0950401
gmx00590	Arachidonic acid metabolism	4	2	0.0253165	0.162196
gmx00592	alpha-Linolenic acid metabolism	3	2	0.0454545	0.0606419
gmx00230	Purine metabolism	6	2	0.019802	0.235477
gmx00280	Valine, leucine and isoleucine degradation	4	2	0.047619	0.0558256
gmx00400	Phenylalanine, tyrosine and tryptophan biosynthesis	4	2	0.0571429	0.040153
gmx00460	Cyanoamino acid metabolism	5	2	0.0444444	0.0631022
gmx00950	Isoquinoline alkaloid biosynthesis	4	2	0.0155039	0.330846
gmx00966	Glucosinolate biosynthesis	5	2	0.025974	0.15576
gmx00970	Aminoacyl-tRNA biosynthesis	7	2	0.0384615	0.081226
gmx01212	Fatty acid metabolism	2	1	0.00819672	0.678299
gmx00030	Pentose phosphate pathway	3	1	0.0277778	0.282297
gmx00040	Pentose and glucuronate interconversions	3	1	0.0172414	0.41469
gmx00640	Propanoate metabolism	2	1	0.0243902	0.314744
gmx00660	C5-Branched dibasic acid metabolism	5	1	0.0294118	0.268902
gmx00190	Oxidative phosphorylation	1	1	0.0625	0.13681
gmx00710	Carbon fixation in photosynthetic organisms	2	1	0.0434783	0.190741
gmx00061	Fatty acid biosynthesis	4	1	0.0172414	0.41469
gmx00062	Fatty acid elongation	1	1	0.025	0.308371
gmx00561	Glycerolipid metabolism	1	1	0.0263158	0.295452
gmx00564	Glycerophospholipid metabolism	5	1	0.0178571	0.403716
gmx00565	Ether lipid metabolism	1	1	0.04	0.205536
gmx01040	Biosynthesis of unsaturated fatty acids	3	1	0.0135135	0.495657
gmx00250	Alanine, aspartate and glutamate metabolism	4	1	0.0357143	0.227232
gmx00260	Glycine, serine and threonine metabolism	6	1	0.0208333	0.357772
gmx00290	Valine, leucine and isoleucine biosynthesis	6	1	0.0434783	0.190741
gmx00330	Arginine and proline metabolism	5	1	0.0144928	0.47161
gmx00430	Taurine and hypotaurine metabolism	3	1	0.0416667	0.198172
gmx00470	D-Amino acid metabolism	8	1	0.0144928	0.47161
gmx00730	Thiamine metabolism	3	1	0.0322581	0.248349
gmx00750	Vitamin B6 metabolism	1	1	0.0344828	0.234335
gmx00760	Nicotinate and nicotinamide metabolism	4	1	0.0181818	0.398154
gmx00770	Pantothenate and CoA biosynthesis	2	1	0.0333333	0.241374
gmx00790	Folate biosynthesis	2	1	0.0172414	0.41469
gmx00905	Brassinosteroid biosynthesis	1	1	0.0344828	0.234335
gmx00908	Zeatin biosynthesis	1	1	0.025641	0.301941
gmx00943	Isoflavonoid biosynthesis	3	1	0.015625	0.446442
gmx00965	Betalain biosynthesis	2	1	0.0434783	0.190741
gmx00261	Monobactam biosynthesis	4	1	0.025641	0.301941
gmx04075	Plant hormone signal transduction	1	1	0.0833333	0.10443
