# Supplementary material for: Waterlogging in soil restricts the growth of Gleditsia sinensis seedlings and inhibits the accumulation of lignans and phenolic acids in thorns
Source: PeerJ. 2024 Mar 22;12:e17137. doi: 10.7717/peerj.17137 (PMC10962338; doi:10.7717/peerj.17137)
Supplement: Supplemental Information 3 [file peerj-12-17137-s003.xlsx]

## Sheet: Soil water poterntial
	Soil water potential (MPa) in control soil and pindstrup soil.
	Treatment	2023-05-01	2023-05-02	2023-05-03	2023-05-04	2023-05-05	2023-05-06	2023-05-07	2023-05-08	2023-05-09	2023-05-10	2023-05-11	2023-05-12	2023-05-13	2023-05-14	2023-05-15	2023-05-16
	Control soil	-0.01	-0.09	-0.24	0	-0.45	-0.33	-0.41	-1.02	-0.96	-0.8	-1.55	-1.07	-2.44	-2.26	-1.09	-4.63
	Control soil	-0.01	-0.23	-0.13	-0.45	-0.48	-0.36	-0.82	-1.38	-0.42	-1.21	-1.28	-1.46	-1.94	-1.35	-1.76	-1.65
	Control soil	-0.01	-0.08	-0.2	-0.52	-0.31	-0.68	-0.77	-1.36	-0.68	-0.56	-1.67	-1.69	-1.05	-1.44	-1.08	-1.22
	Control soil	0	-0.22	-0.47	-0.53	-0.79	-0.48	-0.6	-1.56	-0.54	-1.38	-1.35	-1.69	-1.67	-1.93	-2.11	-3.21
	Pindstrup soil	0	0	0	0	0	-0.02	0	0	-0.03	-0.05	-0.11	-0.15	-0.3	-0.08	-0.11	-0.14
	Pindstrup soil	0	0	0	0	0	0	-0.12	0	0	0	-0.35	0	-0.35	0	0	0
	Pindstrup soil	0	0	0	0	0	-0.02	0	-0.17	0	-0.04	-0.04	0	-0.22	-0.06	-0.19	-0.12
	Pindstrup soil	0	0	0	0	0	-0.05	0	-0.05	0	0	0	-0.14	-0.18	0	-0.01	0

## Sheet: Soil water content
	Soil water content in control soil and pindstrup soil.
	Treatment	2023-05-01	2023-05-02	2023-05-03	2023-05-04	2023-05-05	2023-05-06	2023-05-07	2023-05-08	2023-05-09	2023-05-10	2023-05-11	2023-05-12	2023-05-13	2023-05-14	2023-05-15	2023-05-16
	Control soil	0.5004	0.5317	0.4519	0.3564	0.36	0.3468	0.2971	0.2593	0.2419	0.3404	0.2065	0.3946	0.1931	0.2112	0.3523	0.16
	Control soil	0.6072	0.3971	0.3537	0.3495	0.2628	0.3075	0.3074	0.233	0.2775	0.2865	0.3489	0.2108	0.1974	0.2816	0.2497	0.2133
	Control soil	0.5207	0.5097	0.442	0.2922	0.3806	0.2504	0.2337	0.3431	0.3386	0.2527	0.2006	0.2194	0.2297	0.3108	0.328	0.1899
	Control soil	0.6236	0.4122	0.358	0.2821	0.2404	0.2663	0.2587	0.2492	0.2764	0.2983	0.2977	0.3013	0.2851	0.1979	0.2292	0.1581
	Pindstrup soil	0.5954	0.5449	0.6028	0.6767	0.5301	0.6327	0.6582	0.576	0.5582	0.4362	0.4212	0.4497	0.5438	0.5412	0.5249	0.3853
	Pindstrup soil	0.7272	0.6767	0.7136	0.5994	0.5912	0.5515	0.5924	0.5627	0.3892	0.5188	0.5868	0.6815	0.4907	0.4804	0.5258	0.5224
	Pindstrup soil	0.6212	0.6222	0.5815	0.6236	0.4833	0.4415	0.5893	0.5493	0.6143	0.5432	0.5419	0.4282	0.4875	0.4454	0.489	0.5311
	Pindstrup soil	0.7386	0.7624	0.6816	0.651	0.5224	0.4264	0.548	0.6277	0.5641	0.6834	0.6235	0.4771	0.5465	0.5017	0.4263	0.5454

## Sheet: Soil elements
	Soil physical and cheical properties in control soil and pindstrup soil.
	Treatment	pH	Mn (mg.kg-1)	Fe (g.kg-1)	Cu (mg.kg-1)	Zn (mg.kg-1)	Mo (mg.kg-1)	Mg (g.kg-1)	K (g.kg-1)	Ca (g.kg-1)	TN (%)	TP (g.kg-1)
	Control soil	7.19	855	31.64	84.3	257	2.05	7.41	19.87	14.94	1.98	0.93
	Control soil	7.24	819	36.51	68.7	184	2.15	8.18	21.79	13.25	1.91	0.87
	Control soil	7.25	856	37.13	70.4	182	2.36	7.89	21.15	12.27	1.88	0.86
	Control soil	7.37	869	39.23	84.8	229	2.39	8.29	23.12	13.99	2.57	0.92
	Pindstrup soil	7.4	897	35.8	109	348	4.16	8.27	19.95	28.28	1.97	1.12
	Pindstrup soil	7.49	956	36.03	117	398	3.99	8.22	19.6	31.97	1.92	1.02
	Pindstrup soil	7.64	822	26.43	105	225	4.47	7.37	15.73	34.74	1.87	1.03
	Pindstrup soil	7.68	614	19.28	68.8	265	2.82	5.58	11.74	29.56	1.91	0.94

## Sheet: Plant elements
		Root in one-year G. sinensis seedlings growing in control soil and pindstrup soil
		Treatment	Mn (mg.kg-1)	Fe (g.kg-1)	Cu (mg.kg-1)	Zn (mg.kg-1)	Mo (mg.kg-1)	Mg (g.kg-1)	K (g.kg-1)	Ca (g.kg-1)
		Control soil	134	5.06	51.4	43.1	4.57	1.78	7.01	8.74
		Control soil	266	6.46	40.3	65.9	3.47	1.69	5.75	10.3
		Control soil	209	8.23	64.6	53.6	3.83	1.85	6.91	9.14
		Control soil	179	5.45	45.2	57.8	5.97	1.24	5.59	10.67
		Pindstrup soil	93.6	2.74	271	82.4	56.6	1.65	7.06	11.65
		Pindstrup soil	86.1	2.43	248	93.1	56.3	1.54	6.86	10.83
		Pindstrup soil	118	3.64	240	77.9	62.3	1.55	2.47	11.04
		Pindstrup soil	47.8	1.37	80.7	42.5	31.3	1.98	12.45	5.95
		Stem in one-year G. sinensis seedlings growing in control soil and pindstrup soil
		Treatment	Mn (mg.kg-1)	Fe (g.kg-1)	Cu (mg.kg-1)	Zn (mg.kg-1)	Mo (mg.kg-1)	Mg (g.kg-1)	K (g.kg-1)	Ca (g.kg-1)
		Control soil	9.46	0.1	7.67	16.4	0.39	0.98	12.09	5.5
		Control soil	11.5	0.06	11.2	14.9	0.4	0.83	11.13	4.99
		Control soil	8.21	0.05	5.68	9.9	0.27	0.79	8.87	4
		Control soil	8.9	0.06	6.78	13	0.33	0.62	10.1	4.58
		Pindstrup soil	9.11	0.11	10.5	16.5	1.93	0.98	6.84	6.66
		Pindstrup soil	8.38	0.08	7.67	14.9	1.84	0.96	9.82	5.59
		Pindstrup soil	7.22	0.1	7	12.5	1.74	0.8	5.64	3.68
		Pindstrup soil	9.76	0.11	8.9	17.2	2.6	0.84	7.89	5.31
		Leaf in one-year G. sinensis seedlings growing in control soil and pindstrup soil
		Treatment	Mn (mg.kg-1)	Fe (g.kg-1)	Cu (mg.kg-1)	Zn (mg.kg-1)	Mo (mg.kg-1)	Mg (g.kg-1)	K (g.kg-1)	Ca (g.kg-1)
		Control soil	39.2	0.14	8.98	15.6	0.7	2.37	6.46	14.26
		Control soil	20.3	0.21	8.51	12.4	2.98	1.59	11.36	11.96
		Control soil	56.7	0.27	7.22	15.9	1.07	2.27	6.83	15.54
		Control soil	53.6	0.34	10.8	18.8	0.76	2.42	2.64	16.05
		Pindstrup soil	30.6	0.16	10.5	16.5	4.14	2.45	2.37	15.79
		Pindstrup soil	26.6	0.12	8.87	13.5	3.84	2.18	9.91	12.18
		Pindstrup soil	25.4	0.15	8.36	20	2.77	2.08	5.85	13.81
		Pindstrup soil	44.4	0.2	8.41	18	0.83	2.22	6.12	14.32

## Sheet: Seeding biomass
	Biomass of seedlings grown in control soil and pindstrup soil
	Treatment	Plant height (cm)	Leaflet number (N)	Stem diameter (cm)	Leaf fresh weight (g)	Stem fresh weight (g)	Root fresh weight (g)	Thorn length (cm)	Leaf dry weight (g)	Stem dry weight (g)	Root dry weight (g)
	Control soil	101	10	0.64	15.8	24.1	18.2	2.24	4.96	9.8	5.4
	Control soil	116	16	0.89	18.5	40.1	26.9	2.72	6.35	16.3	8.5
	Control soil	88.4	13	0.7	11	22.6	15.5	2.24	3.88	9.1	6.7
	Control soil	116.7	16	0.65	14.6	23.7	18	2.24	4.24	8.6	4.5
	Pindstrup soil	77.6	11	0.67	12.6	16.3	13	2.28	2.46	6	4.3
	Pindstrup soil	60.1	16	0.61	7	9.6	10.6	1.62	2.57	4.5	2.8
	Pindstrup soil	82.2	15	0.76	12.4	19.6	15.7	2.44	4.38	7.9	4.2
	Pindstrup soil	62.8	12	0.56	8.3	9.4	9.1	1.59	3.45	3.5	2.2
