# Supplementary material for: Waterlogging in soil restricts the growth of Gleditsia sinensis seedlings and inhibits the accumulation of lignans and phenolic acids in thorns
Source: PeerJ journal article supplement (doi:10.7717/peerj.17137), 2024-03-22
Supplement: Supplementary_Figure.pdf [file Supplementary_Figure.pdf]

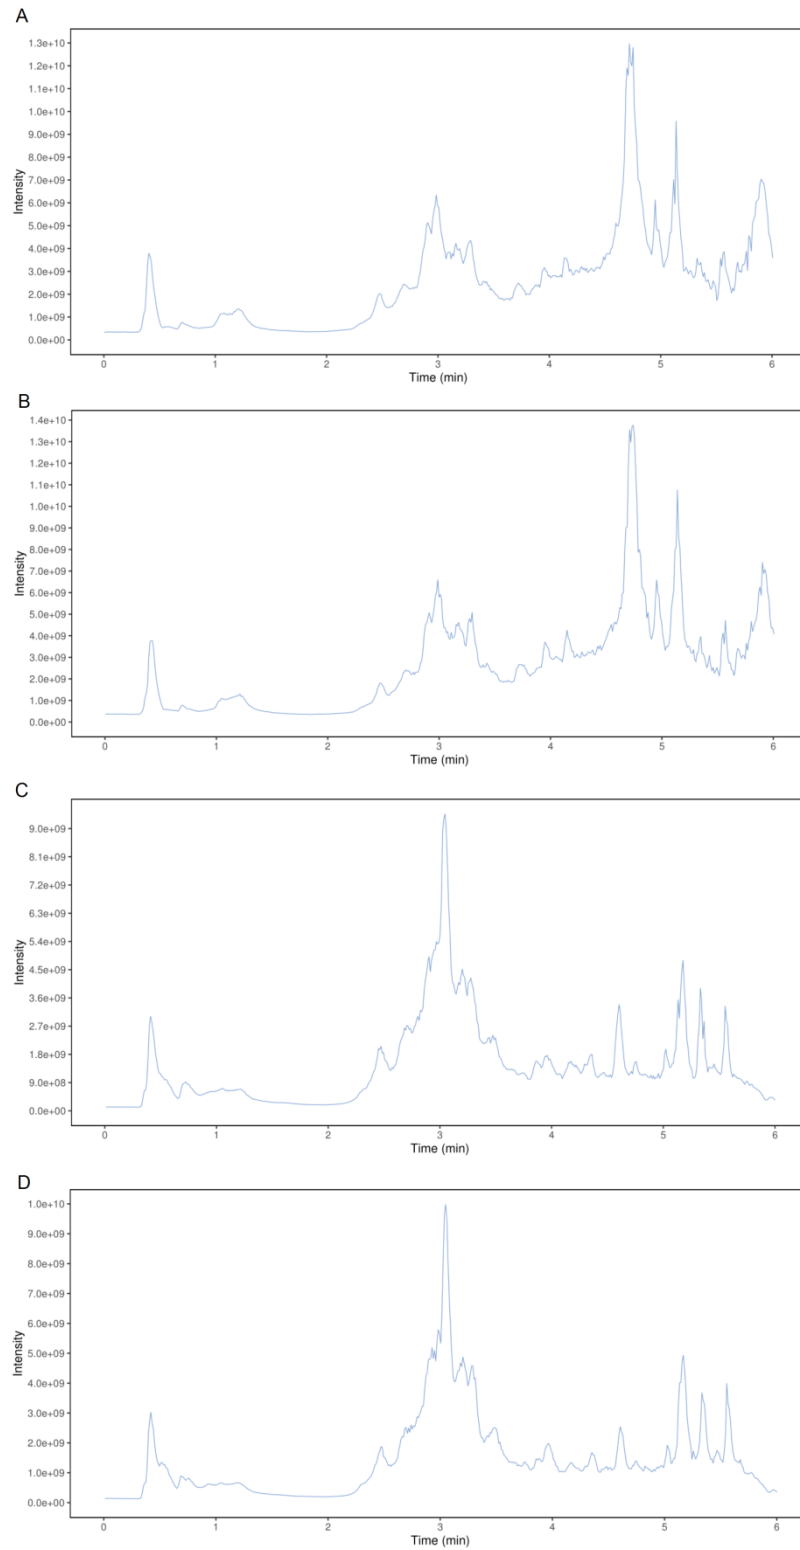

**Figure S1.** TIC chromatogram of thorn in *G. sinensis* growing in control soil and pindstrup soil. (A) positive ion mode in control soil; (B) positive ion mode in pindstrup soil; (C) negative ion mode in control soil; (D) negative ion mode in pindstrup soil.
